# Supplementary material
Source: publisher figshare collection journal article supplement (https://tandf.figshare.com/articles/dataset/_/5982280)
Supplement: Supplementary file 3 [file 1]

[illegible]



| TYPE OF INFRASTRUCTURES | REFERENCE                                                                                                                                                                     | ORIGINITY                     | TARGETED INDIVIDUALS                    | AIM / OBJECTIVES / HYPOTHESES                                                                                                                                                                                                                                                                                                                                                                                                                                                                                                                                                                   | JUSTIFICATION                                                                                                                                                                                                                                                                                                                                                                                                                                                                                                                                                                                                                                                                                                                      | PARTICIPANTS                                                                                                                                                                                                                                          | METHODOLOGY / SET UP                                                                                                                                                                                                                                                                                                                                                                                                                                                                                                                                                                                                                                                                                                                                                                                                                                                                                                                                                                                                                                                                                                                                                                                                                                                                                                                                                                                                                                                                                                                                                                                                                                                                                                                                                                                                                                                                                                                                                                                                                                                                                                                                                                                                                                                                                                                                                                                                                                                                                                                                                                                                                                                                                                                                                                                                                                                                                                                                                                                                                                                                                                                                                                                                                                                                                                                                                                                                                                                                                  | RESEARCH TOOLS                                                                                                                                                                                                                                                                                                                                                                                                                                                                                                                                                                                                             | VARIABLES / INDICATORS STUDIED                                                                                                                                                                                                                                                                                                                                                                                                                                                                                                                                                                                                                                                                                                                                                                                                                                                                                                                                                                                                                                                                                                                                                                                                                                                                                                                                                                                                                                                                                                                                                                                                                                                                                                                                                                                                                                                                                                                                                                                                                                                                                                | ANALYSIS / INTERPRETATION                                                                                                                                                                                                                                                                                                                                                                                                                                                                                                                                                                                                                                                                                                                                                                                                                                                                                                                                                                                                                                                                                                                                                                                                                                                                                                                                                                                                                                                                                                                                                                                                                                                                                                                                                                                                                                                                                                                                                                                                                                                                                                                                                                                                                                                                                                                                                                                                                                                                                                                                                                                                                                                                                                                                                                                                                                                                                                                                                                                                                                                                                                                                                                                                                                                                                                                                                                                                                                                               | RESULTS                                                                                                                                                                                                                                                                                                                                                                                                                                                                                                                                                                                   | STATED LIMITS                                                                                                                                                                                                                                              | CONCLUSION (THE BEST INFRASTRUCTURE/PRACTICE)                                                                                                                                                                                                                                                                                                                                                                                                                                                                                                                                                                                                                                                                                                                                                                                                                                                                                                                                                                                                                                                                                                                                                                                                                                                                                                                                                                                                                                                                | QUALITY                                                                                                                                                                                                                                                                                                                                                                                                                                                                                                                                                                                                                                                                                                            |                                                                                                                                                                                                                                                                                                                                                                                                                                                                                                                                                                                                                                                                                                                  |                                                                                                                                                                                                                                                                                                                                                                                                                                                                                                                                                                                                                                                                                                                                                                                                                                                                                                                                                                                    |                                                                                                                                                                                                                                                                                                                                                                                                                    |                                                                                                                                                                                                                                                                                                                                                                                                                                                                                                          |                                                                                                                                                                                                                                                                                                                                                                                                                                                                                                                                                                                                                                                                                                                                                                                                                                                                                                                                                                                                                                                                                                                                                                                                                                                                                                                                                                                                                                                                                                                                                                                                                       |       |                                                                                                                                    |                                                   |                                                                                                                 |                                                                                                                                                                                                                                                                                                                                                                                                                                                                                                                                                                                                                                                                                                                                                                                                                                                                                                                                                                                                                                                    |                                                                                                                                                                                                                                                                                                                                                                                                                                                                                                                                                                                                                                                                                                                                                                                                                                                                                                                                                                                                                                                                                                                                                                                                                                                                                                                                                                                                                                                                                                                                                                                                                                                                                                                                                                                                                                                                                                                                                                                                                                                                                                                                                                                                                                                                                                                                                                                                                                                                                                                                                                                                                                                                                                                                                                                                                                                                                                                                                                                                                                                                                                                                                                                                                                                                                                                                                                                                                                                                                                                                                                                                                                                                                                                                                                                                                                                                                                                                                                                                                                                                                                                                                                                                                                                                                                                                                                                                                                                                                                                                                                                                                                                                                                                                                                                                                                                                                                                                                                                                                                                                                                                                                                                                                                                                                                                                                                                                                                                                                                                                                                                                                                                                                                                                                                                                                                                                                                                                                                                                                                                                                                                                                                                                                                                                                                                                                                                                                                                                                                                                                                                                                                                                                                                                                                                                                                                                                                                                                                                                                                                                                                                                                                                                                                                                                                                                                                                                                                                                                                                                                                                                                                                                                                                                                                                                                                                                                                                                                                                                                                                                                                                                                                                                                                                                                                                                                                                                                                                                                                                                                                                                                                                                                                                                                                                                                                                                                                                                                                                                                                                                                                                                                                                                                                                                                                                                                                                                                                                                                                                                                                                                                                                                                                                                                                                                                                                                                                                                                                                                                                                                                                                                                                                                                                                                                                                                                                                                                                                                                                                                                                                                                                                                                                                                                                                                                                                                                                                                                                                                                                                                                                                                                                                                                                                                                                                                                                                                                                                                                                                                                                                                                                                                                                                                                                                                                                                                                                                                                                                                                                                                                                                                                                                                                                                                                                                                                                                                                                                                                                                                                                                                                                                                                                                                                                                                                                                                                                                                                                                                                                                                                                                                                                                                                                                                                                                                                                                                                                                                                                                                                                                                                                                                                                                                                                                                                                                                                                                                                                                                                                                                                                                                                                                                                                                                                                                                                                                                                                                                                                                                                                                                                                                                                                                                                                                                                                                                                                                                                                                                                                                                                                                                                                                                                                                                                                                                                                                                                                                                                                                                                                                                                                                                                                                                                                                                                                                                                                                                                                                                                                                                                                                                                                                                                                                                                                                                                                                                                                                                                                                                                                                                                                                                                                                                                                                                                                                                                                                                                                                                                                                                                                                                                                                                                                                                                                                                                                                                                                                                                                                                                                                                                                                                                                                                                                                                                                                                                                                                                                                                                                                                                                                                                                                                                                                                                                                                                                                                                                                                                                                                                                                                                                                                                                                                                                                                                                                                                                                                                                                                                                                                                                                                                                                                                                                                                                                                                                                                                                                                                                                                                                                                                                                                                                                                                                                                                                                                                                                                                                                                                                                                                                                                                                                                                                                                                                                                                                                                                                                                                                                                                                                                                                                                                                                                                                                                                                                                                                                                                                                                                                                                                                                                                                                                                                                                                                                                                                                                                                                                                                                                                                                                                                                                                                                                                                                                                                                                                                                                                                                                                                                                                                                                                                                                                                                                                                                                                                                                                                                                                                                                                                                                                                                                                                                                                                                                                                                                                                                                                                                                                                                                                                                                                                                                                                                                                                                                                                                                                                                                                                                                                                                                                                                                                                                                                                                                                                                                                                                                                                                                                                                                                                                                                                                                                                                                                                                                                                                                                                                                                                                                                                                                                                                                                                                                                                                                                                                                                                                                                                                                                                                                                                                                                                                                                                                                                                                                                                                                                                                                                                                                                                                                                                                                                                                                                                                                                                                                                                                                                                                                                                                                                                                                                                                                                                                                                                                                                                                                                                                                                                                                                                                                                                                                                                                                                                                                                                                                                                                                                                                                                                                                                                                                                                                                                                                                                                                                                                                                                                                                                                                                                                                                                                                                                                                                                                                                                                                                                                                                                                                                                                                                                                                                                                                                                                                                                                                                                                                                                                                                                                                                                                                                                                                                                                                                                                                                                                                                                                                                                                                                                                                                                                                                                                                                                                                                                                                                                                                                                                                                                                                                                                                                                                                                                                                                                                                                                                                                                                                                                                                                                                                                                                                                                                                                                                                                                                                                                                                                                                                                                                                                                                                                                                                                                                                                                                                                                                                                                                                                                                                                                                                                                                                                                                                                                                                                                                                                                                                                                                                                                                                                                                                                                                                                                                                                                                                                                                                                                                                                                                                                                                                                                                                                                                                                                                                                                                                                                                                                                                                                                                                                                                                                                                                                                                                                                                                                                                                                                                                                                                                                                                                                                                                                                                                                                                                                                                                                                                                                                                                                                                                                                                                                                                                                                                                                                                                                                                                                                                                                                                                                                                                                                                                                                                                                                                                                                                                                                                                                                                                                                                                                                                                                                                                                                                                                                                                                                                                                                                                                                                                                                                                                                                                      |
|-------------------------|-------------------------------------------------------------------------------------------------------------------------------------------------------------------------------|-------------------------------|-----------------------------------------|-------------------------------------------------------------------------------------------------------------------------------------------------------------------------------------------------------------------------------------------------------------------------------------------------------------------------------------------------------------------------------------------------------------------------------------------------------------------------------------------------------------------------------------------------------------------------------------------------|------------------------------------------------------------------------------------------------------------------------------------------------------------------------------------------------------------------------------------------------------------------------------------------------------------------------------------------------------------------------------------------------------------------------------------------------------------------------------------------------------------------------------------------------------------------------------------------------------------------------------------------------------------------------------------------------------------------------------------|-------------------------------------------------------------------------------------------------------------------------------------------------------------------------------------------------------------------------------------------------------|-------------------------------------------------------------------------------------------------------------------------------------------------------------------------------------------------------------------------------------------------------------------------------------------------------------------------------------------------------------------------------------------------------------------------------------------------------------------------------------------------------------------------------------------------------------------------------------------------------------------------------------------------------------------------------------------------------------------------------------------------------------------------------------------------------------------------------------------------------------------------------------------------------------------------------------------------------------------------------------------------------------------------------------------------------------------------------------------------------------------------------------------------------------------------------------------------------------------------------------------------------------------------------------------------------------------------------------------------------------------------------------------------------------------------------------------------------------------------------------------------------------------------------------------------------------------------------------------------------------------------------------------------------------------------------------------------------------------------------------------------------------------------------------------------------------------------------------------------------------------------------------------------------------------------------------------------------------------------------------------------------------------------------------------------------------------------------------------------------------------------------------------------------------------------------------------------------------------------------------------------------------------------------------------------------------------------------------------------------------------------------------------------------------------------------------------------------------------------------------------------------------------------------------------------------------------------------------------------------------------------------------------------------------------------------------------------------------------------------------------------------------------------------------------------------------------------------------------------------------------------------------------------------------------------------------------------------------------------------------------------------------------------------------------------------------------------------------------------------------------------------------------------------------------------------------------------------------------------------------------------------------------------------------------------------------------------------------------------------------------------------------------------------------------------------------------------------------------------------------------------------|----------------------------------------------------------------------------------------------------------------------------------------------------------------------------------------------------------------------------------------------------------------------------------------------------------------------------------------------------------------------------------------------------------------------------------------------------------------------------------------------------------------------------------------------------------------------------------------------------------------------------|-------------------------------------------------------------------------------------------------------------------------------------------------------------------------------------------------------------------------------------------------------------------------------------------------------------------------------------------------------------------------------------------------------------------------------------------------------------------------------------------------------------------------------------------------------------------------------------------------------------------------------------------------------------------------------------------------------------------------------------------------------------------------------------------------------------------------------------------------------------------------------------------------------------------------------------------------------------------------------------------------------------------------------------------------------------------------------------------------------------------------------------------------------------------------------------------------------------------------------------------------------------------------------------------------------------------------------------------------------------------------------------------------------------------------------------------------------------------------------------------------------------------------------------------------------------------------------------------------------------------------------------------------------------------------------------------------------------------------------------------------------------------------------------------------------------------------------------------------------------------------------------------------------------------------------------------------------------------------------------------------------------------------------------------------------------------------------------------------------------------------------|-----------------------------------------------------------------------------------------------------------------------------------------------------------------------------------------------------------------------------------------------------------------------------------------------------------------------------------------------------------------------------------------------------------------------------------------------------------------------------------------------------------------------------------------------------------------------------------------------------------------------------------------------------------------------------------------------------------------------------------------------------------------------------------------------------------------------------------------------------------------------------------------------------------------------------------------------------------------------------------------------------------------------------------------------------------------------------------------------------------------------------------------------------------------------------------------------------------------------------------------------------------------------------------------------------------------------------------------------------------------------------------------------------------------------------------------------------------------------------------------------------------------------------------------------------------------------------------------------------------------------------------------------------------------------------------------------------------------------------------------------------------------------------------------------------------------------------------------------------------------------------------------------------------------------------------------------------------------------------------------------------------------------------------------------------------------------------------------------------------------------------------------------------------------------------------------------------------------------------------------------------------------------------------------------------------------------------------------------------------------------------------------------------------------------------------------------------------------------------------------------------------------------------------------------------------------------------------------------------------------------------------------------------------------------------------------------------------------------------------------------------------------------------------------------------------------------------------------------------------------------------------------------------------------------------------------------------------------------------------------------------------------------------------------------------------------------------------------------------------------------------------------------------------------------------------------------------------------------------------------------------------------------------------------------------------------------------------------------------------------------------------------------------------------------------------------------------------------------------------------|-------------------------------------------------------------------------------------------------------------------------------------------------------------------------------------------------------------------------------------------------------------------------------------------------------------------------------------------------------------------------------------------------------------------------------------------------------------------------------------------------------------------------------------------------------------------------------------------|------------------------------------------------------------------------------------------------------------------------------------------------------------------------------------------------------------------------------------------------------------|--------------------------------------------------------------------------------------------------------------------------------------------------------------------------------------------------------------------------------------------------------------------------------------------------------------------------------------------------------------------------------------------------------------------------------------------------------------------------------------------------------------------------------------------------------------------------------------------------------------------------------------------------------------------------------------------------------------------------------------------------------------------------------------------------------------------------------------------------------------------------------------------------------------------------------------------------------------------------------------------------------------------------------------------------------------------------------------------------------------------------------------------------------------------------------------------------------------------------------------------------------------------------------------------------------------------------------------------------------------------------------------------------------------------------------------------------------------------------------------------------------------|--------------------------------------------------------------------------------------------------------------------------------------------------------------------------------------------------------------------------------------------------------------------------------------------------------------------------------------------------------------------------------------------------------------------------------------------------------------------------------------------------------------------------------------------------------------------------------------------------------------------------------------------------------------------------------------------------------------------|------------------------------------------------------------------------------------------------------------------------------------------------------------------------------------------------------------------------------------------------------------------------------------------------------------------------------------------------------------------------------------------------------------------------------------------------------------------------------------------------------------------------------------------------------------------------------------------------------------------------------------------------------------------------------------------------------------------|------------------------------------------------------------------------------------------------------------------------------------------------------------------------------------------------------------------------------------------------------------------------------------------------------------------------------------------------------------------------------------------------------------------------------------------------------------------------------------------------------------------------------------------------------------------------------------------------------------------------------------------------------------------------------------------------------------------------------------------------------------------------------------------------------------------------------------------------------------------------------------------------------------------------------------------------------------------------------------|--------------------------------------------------------------------------------------------------------------------------------------------------------------------------------------------------------------------------------------------------------------------------------------------------------------------------------------------------------------------------------------------------------------------|----------------------------------------------------------------------------------------------------------------------------------------------------------------------------------------------------------------------------------------------------------------------------------------------------------------------------------------------------------------------------------------------------------------------------------------------------------------------------------------------------------|-----------------------------------------------------------------------------------------------------------------------------------------------------------------------------------------------------------------------------------------------------------------------------------------------------------------------------------------------------------------------------------------------------------------------------------------------------------------------------------------------------------------------------------------------------------------------------------------------------------------------------------------------------------------------------------------------------------------------------------------------------------------------------------------------------------------------------------------------------------------------------------------------------------------------------------------------------------------------------------------------------------------------------------------------------------------------------------------------------------------------------------------------------------------------------------------------------------------------------------------------------------------------------------------------------------------------------------------------------------------------------------------------------------------------------------------------------------------------------------------------------------------------------------------------------------------------------------------------------------------------|-------|------------------------------------------------------------------------------------------------------------------------------------|---------------------------------------------------|-----------------------------------------------------------------------------------------------------------------|----------------------------------------------------------------------------------------------------------------------------------------------------------------------------------------------------------------------------------------------------------------------------------------------------------------------------------------------------------------------------------------------------------------------------------------------------------------------------------------------------------------------------------------------------------------------------------------------------------------------------------------------------------------------------------------------------------------------------------------------------------------------------------------------------------------------------------------------------------------------------------------------------------------------------------------------------------------------------------------------------------------------------------------------------|----------------------------------------------------------------------------------------------------------------------------------------------------------------------------------------------------------------------------------------------------------------------------------------------------------------------------------------------------------------------------------------------------------------------------------------------------------------------------------------------------------------------------------------------------------------------------------------------------------------------------------------------------------------------------------------------------------------------------------------------------------------------------------------------------------------------------------------------------------------------------------------------------------------------------------------------------------------------------------------------------------------------------------------------------------------------------------------------------------------------------------------------------------------------------------------------------------------------------------------------------------------------------------------------------------------------------------------------------------------------------------------------------------------------------------------------------------------------------------------------------------------------------------------------------------------------------------------------------------------------------------------------------------------------------------------------------------------------------------------------------------------------------------------------------------------------------------------------------------------------------------------------------------------------------------------------------------------------------------------------------------------------------------------------------------------------------------------------------------------------------------------------------------------------------------------------------------------------------------------------------------------------------------------------------------------------------------------------------------------------------------------------------------------------------------------------------------------------------------------------------------------------------------------------------------------------------------------------------------------------------------------------------------------------------------------------------------------------------------------------------------------------------------------------------------------------------------------------------------------------------------------------------------------------------------------------------------------------------------------------------------------------------------------------------------------------------------------------------------------------------------------------------------------------------------------------------------------------------------------------------------------------------------------------------------------------------------------------------------------------------------------------------------------------------------------------------------------------------------------------------------------------------------------------------------------------------------------------------------------------------------------------------------------------------------------------------------------------------------------------------------------------------------------------------------------------------------------------------------------------------------------------------------------------------------------------------------------------------------------------------------------------------------------------------------------------------------------------------------------------------------------------------------------------------------------------------------------------------------------------------------------------------------------------------------------------------------------------------------------------------------------------------------------------------------------------------------------------------------------------------------------------------------------------------------------------------------------------------------------------------------------------------------------------------------------------------------------------------------------------------------------------------------------------------------------------------------------------------------------------------------------------------------------------------------------------------------------------------------------------------------------------------------------------------------------------------------------------------------------------------------------------------------------------------------------------------------------------------------------------------------------------------------------------------------------------------------------------------------------------------------------------------------------------------------------------------------------------------------------------------------------------------------------------------------------------------------------------------------------------------------------------------------------------------------------------------------------------------------------------------------------------------------------------------------------------------------------------------------------------------------------------------------------------------------------------------------------------------------------------------------------------------------------------------------------------------------------------------------------------------------------------------------------------------------------------------------------------------------------------------------------------------------------------------------------------------------------------------------------------------------------------------------------------------------------------------------------------------------------------------------------------------------------------------------------------------------------------------------------------------------------------------------------------------------------------------------------------------------------------------------------------------------------------------------------------------------------------------------------------------------------------------------------------------------------------------------------------------------------------------------------------------------------------------------------------------------------------------------------------------------------------------------------------------------------------------------------------------------------------------------------------------------------------------------------------------------------------------------------------------------------------------------------------------------------------------------------------------------------------------------------------------------------------------------------------------------------------------------------------------------------------------------------------------------------------------------------------------------------------------------------------------------------------------------------------------------------------------------------------------------------------------------------------------------------------------------------------------------------------------------------------------------------------------------------------------------------------------------------------------------------------------------------------------------------------------------------------------------------------------------------------------------------------------------------------------------------------------------------------------------------------------------------------------------------------------------------------------------------------------------------------------------------------------------------------------------------------------------------------------------------------------------------------------------------------------------------------------------------------------------------------------------------------------------------------------------------------------------------------------------------------------------------------------------------------------------------------------------------------------------------------------------------------------------------------------------------------------------------------------------------------------------------------------------------------------------------------------------------------------------------------------------------------------------------------------------------------------------------------------------------------------------------------------------------------------------------------------------------------------------------------------------------------------------------------------------------------------------------------------------------------------------------------------------------------------------------------------------------------------------------------------------------------------------------------------------------------------------------------------------------------------------------------------------------------------------------------------------------------------------------------------------------------------------------------------------------------------------------------------------------------------------------------------------------------------------------------------------------------------------------------------------------------------------------------------------------------------------------------------------------------------------------------------------------------------------------------------------------------------------------------------------------------------------------------------------------------------------------------------------------------------------------------------------------------------------------------------------------------------------------------------------------------------------------------------------------------------------------------------------------------------------------------------------------------------------------------------------------------------------------------------------------------------------------------------------------------------------------------------------------------------------------------------------------------------------------------------------------------------------------------------------------------------------------------------------------------------------------------------------------------------------------------------------------------------------------------------------------------------------------------------------------------------------------------------------------------------------------------------------------------------------------------------------------------------------------------------------------------------------------------------------------------------------------------------------------------------------------------------------------------------------------------------------------------------------------------------------------------------------------------------------------------------------------------------------------------------------------------------------------------------------------------------------------------------------------------------------------------------------------------------------------------------------------------------------------------------------------------------------------------------------------------------------------------------------------------------------------------------------------------------------------------------------------------------------------------------------------------------------------------------------------------------------------------------------------------------------------------------------------------------------------------------------------------------------------------------------------------------------------------------------------------------------------------------------------------------------------------------------------------------------------------------------------------------------------------------------------------------------------------------------------------------------------------------------------------------------------------------------------------------------------------------------------------------------------------------------------------------------------------------------------------------------------------------------------------------------------------------------------------------------------------------------------------------------------------------------------------------------------------------------------------------------------------------------------------------------------------------------------------------------------------------------------------------------------------------------------------------------------------------------------------------------------------------------------------------------------------------------------------------------------------------------------------------------------------------------------------------------------------------------------------------------------------------------------------------------------------------------------------------------------------------------------------------------------------------------------------------------------------------------------------------------------------------------------------------------------------------------------------------------------------------------------------------------------------------------------------------------------------------------------------------------------------------------------------------------------------------------------------------------------------------------------------------------------------------------------------------------------------------------------------------------------------------------------------------------------------------------------------------------------------------------------------------------------------------------------------------------------------------------------------------------------------------------------------------------------------------------------------------------------------------------------------------------------------------------------------------------------------------------------------------------------------------------------------------------------------------------------------------------------------------------------------------------------------------------------------------------------------------------------------------------------------------------------------------------------------------------------------------------------------------------------------------------------------------------------------------------------------------------------------------------------------------------------------------------------------------------------------------------------------------------------------------------------------------------------------------------------------------------------------------------------------------------------------------------------------------------------------------------------------------------------------------------------------------------------------------------------------------------------------------------------------------------------------------------------------------------------------------------------------------------------------------------------------------------------------------------------------------------------------------------------------------------------------------------------------------------------------------------------------------------------------------------------------------------------------------------------------------------------------------------------------------------------------------------------------------------------------------------------------------------------------------------------------------------------------------------------------------------------------------------------------------------------------------------------------------------------------------------------------------------------------------------------------------------------------------------------------------------------------------------------------------------------------------------------------------------------------------------------------------------------------------------------------------------------------------------------------------------------------------------------------------------------------------------------------------------------------------------------------------------------------------------------------------------------------------------------------------------------------------------------------------------------------------------------------------------------------------------------------------------------------------------------------------------------------------------------------------------------------------------------------------------------------------------------------------------------------------------------------------------------------------------------------------------------------------------------------------------------------------------------------------------------------------------------------------------------------------------------------------------------------------------------------------------------------------------------------------------------------------------------------------------------------------------------------------------------------------------------------------------------------------------------------------------------------------------------------------------------------------------------------------------------------------------------------------------------------------------------------------------------------------------------------------------------------------------------------------------------------------------------------------------------------------------------------------------------------------------------------------------------------------------------------------------------------------------------------------------------------------------------------------------------------------------------------------------------------------------------------------------------------------------------------------------------------------------------------------------------------------------------------------------------------------------------------------------------------------------------------------------------------------------------------------------------------------------------------------------------------------------------------------------------------------------------------------------------------------------------------------------------------------------------------------------------------------------------------------------------------------------------------------------------------------------------------------------------------------------------------------------------------------------------------------------------------------------------------------------------------------------------------------------------------------------------------------------------------------------------------------------------------------------------------------------------------------------------------------------------------------------------------------------------------------------------------------------------------------------------------------------------------------------------------------------------------------------------------------------------------------------------------------------------------------------------------------------------------------------------------------------------------------------------------------------------------------------------------------------------------------------------------------------------------------------------------------------------------------------------------------------------------------------------------------------------------------------------------------------------------------------------------------------------------------------------------------------------------------------------------------------------------------------------------------------------------------------------------------------------------------------------------------------------------------------------------------------------------------------------------------------------------------------------------------------------------------------------------------------------------------------------------------------------------------------------------------------------------------------------------------------------------------------------------------------------------------------------------------------------------------------------------------------------------------------------------------------------------------------------------------------------------------------------------------------------------------------------------------------------------------------------------------------------------------------------------------------------------------------------------------------------------------------------------------------------------------------------------------------------------------------------------------------------------------------------------------------------------------------------------------------------------------------------------------------------------------------------------------------------------------------------------------------------------------------------------------------------------------------------------------------------------------------------------------------------------------------------------------------------------------------------------------------------------------------------------------------------------------------------------------------------------------------------------------------------------------------------------------------------------------------------------------------------------------------------------------------------------------------------------------------------------------------------------------------------------------------------------------------------------------------------------------------------------------------------------------------------------------------------------------------------------------------------------------------------------------------------------------------------------------------------------------------------------------------------------------------------------------------------------------------------------------------------------------------------------------------------------------------------------------------------------------------------------------------------------------------------------------------------------------------------------------------------------------------------------------------------------------------------------------------------------------------------------------------------------------------------------------------------------------------------------------------------------------------------------------------------------------------------------------------------------------------------------------------------------------------------------------------------------------------------------------------------------------------------------------------------------------------------------------------------------------------------------------------------------------------------------------------------------------------------------------------------------------------------------------------------------------------------------------------------------------------------------------------------------------------------------------------------------------------------------------------------------------------------------------------------------------------------------------------------------------------------------------------------------------------------------------------------------------------------------------------------------------------------------------------------------------------------------------------------------------------------------------------------------------------------------------------------------------------------------------------------------------------------------------------------------------------------------------------------------------------------------------------------------------------------------------------------------------------------------------------------------------------------------------------------------------------------------------------------------------------------------------------------------------------------------------------------------------------------------------------------------------------------------------------------------------------------------------------------------------------------------------------------------------------------------------------------------------------------------------------------------------------------------------------------------------------------------------------------------------------------------------------------------------------------------------------------------------------------------------------------------------------------------------------------------------------------------------------------------------------------------------------------------------------------------------------------------------------------------------------------------------------------------------------------------------------------------------------------------------------------------------------------------------------------------------------------------------------------------------------------------------------------------------------------------------------------------------------------------------------------------------------------------------------------------------------------------------------------------------------------------------------------------------------------------------------------------------------------------------------------------------------------------------------------------------------------------------------------------------------------------------------------------------------------------------------------------------------------------------------------------------------------------------------------------------------------------------------------------------------------------------------------------------------------------------------------------------------------------------------------------------------------------------------------------------------------------------------------------------------------------------------------------------------------------------------------------------------------------------------------------------------------------------------------------------------------------------------------------------------------------------------------------------------------------------------------------------------------------------------------------------------------------------------------------------------------------------------------------------------------------------------------------------------------------------------------------------------------------------------------------------------------------------------------------------------------------------------------------------------------------------------------------------------------------------------------------------------------------------------------------------------------------------------------------------------------------------------------------------------------------------------------------------------------------------------------------------------------------------------------------------------------------------------------------------------------------------------------------------------------------------------------------------------------------------------------------------------------------------------------------------------------------------------------------------------------------------------------------------------------------------------------------------------------------------------------------------------------------------------------------------------------------------------------------------------------------------------------------------------------------------------------------------------------------------------------------------------------------------------------------------------------------------------------------------------------------------------------------------------------------------------------------------------------------------------------------------------------------------------------------------------------------------------------------------------------------------------------------------------------------------------------------------------------------------------------------------------------------------------------------------------------------------------------------------------------------------------------------------------------------------------------------------------------------------------------------------------------------------------------------------------------------------------------------------------------------------------------------------------------------------------------------------------------------------------------------------------------------------------------------------------------------------------------------------------------------------------------------------------------------------------------------------------------------------------------------------------------------------------------------------------------------------------------------------------------------------------------------------------------------------------------------------------------------------------------------------------------------------------------------------------------------------------------------------------------------------------------------------------------------------------------------------------------------------------------------------------------------------------------------------------------------------------------------------------------------------------------------------------------------------------------------------------------------------------------------------------------------------------------------------------------------------------------------------------------------------------------------------------------------------------------------------------------------------------------------------------------------------------------------------------------------------------------------------------------------------------------------------------------------------------------------------------------------------------------------------------------------------------------------------------------------------------------------------------------------------------------------------------------------------------------------------------------------------------------------------------------------------------------------------------------------------------------------------------------------------------------------------------------------------------------------------------------------------------------------------------------------------------------------------------------------------------------------------------------------------------------------------------------------------------------------------------------------------------------------------------------------------------------------------------------------------------------------------------------------------------------------------------------------------------------------------------------------------------------------------------------------------------------------------------------------------------------------------------------------------------------------------------------------------------------------------------------------------------------------------------------------------------------------------------------------------------------------------------------------------------------------------------------------------------------------------------------------------------------------------------------------------------------------------------------------------------------------------------------------------------------------------------------------------------------------------------------------------------------------------------------------------------------------------------------------------------------------------------------------------------------------------------------------------------------------------------------------------------------------------------------------------------------------------------------------------------------------------------------------------------------------------------------------------------------------------------------------------------------------------------------------------------------------------------------------------------------------------------------------------------------------------------------------------------------------|
|                         | Gallon, C. (1992). Tactile surfaces in the pedestrian environment: experiments in Wolverhampton. <i>Transport and Road Research Laboratory, Contractor Report 317</i> , 1-47. | Wolverhampton, United Kingdom | Visually impaired and mobility impaired | <p>The uncontrolled road crossing: To find out whether the tactile surface could be detected and if the layout was useful for visually impaired pedestrians. To establish whether blind people encountered any problems when negotiating a non-parallel crossing.</p> <p>Coseley Railway Station: To ascertain whether visually impaired people could detect a train platform edge warning surface. To find out whether the warning surface was loud enough and how far from the platform edge the surface should be installed. To assess a rubber version of the warning of steps surface.</p> | Tactile surfaces are special footway surfaces designed to provide visually impaired pedestrians with information regarding their immediate environment. In November 1988, the Centre for Transport Studies (CTS), under contract to the Transport and Road Research Laboratory, conducted research to determine how many different tactile patterns could be detected and distinguished by visually impaired people. The output from this research was the recommendation of a number of different tactile surfaces, each with a different message for the pedestrian (warning, guidance or information), each distinguishable by all or virtually all visually handicapped people and none causing problems to other pedestrians. | There was a fairly even distribution between the type of mobility aid people used. Only 6 people did not use any form of aid. All the people who used guide dogs had been trained. Only 40% of the remaining subjects had received mobility training. | <p>Chapel Ash-Road Crossing Site. The tactile pattern was moulded on the surface of concrete paving and each slab measured 400mm x 400mm. The variation of profile height (room - 4mm) was attributed to the effects of coating the slabs with 'Day-Glow Yellow' paint, applied to enhance the visual quality of the surface. On one side of the road the dropped kerb was rectangular wide brick pavers. All this area was coloured yellow. On the opposite side of the road, a dropped kerb had been installed on a curve that fed into the middle of the junction. The central reservation was level with the highway and three rows of tactile paving, measuring 1.2 m in total width were installed. The tactile area was edged with brick pavers measuring 100 mm in width, and the whole area was painted yellow. ... Subjects were positioned approximately 10m from the tactile surface and asked to walk to the edge of the road and stop. They were asked if they had detected a tactile surface. A series of questions regarding the surface and layout were asked. Subjects were instructed to cross the road only when a researcher said proceed. Whilst crossing the road, a researcher walked on each side of the subject. If the person began to veer away from the central reservation he/she was guided in the right direction. Once on the central reservation, subjects were asked 'where are you now?' When it was safe to cross to the other side of the highway, subjects were told to proceed.</p> <p>Coseley Railway Station. The station platform were marked with a yellow painted line (the turbulence line) beyond which it was not advisable to stand because of fast through trains. On the platform that was only accessible by steps, designated platform A, a single row of rubber tiles was laid 910 mm from the edge onto concrete surface. On platform B, the tiles were laid 610 mm from the edge on granite paving. The rubber tiles measured 300 mm x 300 mm and had a pattern profile of 5 mm. ... Subjects were allocated to either platform A or platform B and positioned either at the top of the steps (platform A access) or the top of the steps (platform B access). They were asked to proceed to the railway platform and to stop when it was reached. At this stage, all subjects were asked, 'where are you now?'. Those subjects allocated to platform A were asked whether they had detected a tactile surface at the bottom of the steps. Those who had not were guided to the surface and each subject was asked a series of questions about it. Subjects were then told that said that the tactile surface had been laid to warn that they were close to the edge of the railway platform, and that we were testing whether this worked. Each subject was positioned approximately 10m from the platform edge and told they were facing the platform edge, located below the edge there is a tactile surface, please proceed forward when I tell you, to stop when you feel the tactile surface and move back. If I tell you to stop, you must stop immediately. The researcher positioned him or herself on the tactile surface to one side of the subject's direct path and asked the subject to proceed. Any subject who failed to detect the tactile surface was stopped immediately by researchers. Subjects were positioned away from the platform edge whilst they answered a series of questions about the surface and layout.</p> | Video recordings were made of pedestrian movement across St Peter's Square to assess whether the tactile guidance path influenced people's walking behaviour in any way. The recordings were made on Friday, 23 February and Monday, 10 March from 11.30 to 13.45. The analysis of the video recordings involved detailed monitoring of pedestrians walking across the square every tenth minute. Pedestrian behaviour was classified in three ways: people who walked along the guidance path across the square; people who walked along the path partially across the square and those who did not walk the path at all. | Most subjects (82%) knew when they had reached the station platform. However, 7 people, 2 of whom were totally blind, did not know where they were. 5 of these subjects travelled uncompromised and 2 of them travelled by rail alone. Over half the subjects who were allocated to site A (82%), detected the rubber corridor at dropped kerbs at the bottom of the steps to the platform. All 21 people were asked if they could feel the tactile pattern, and most (81%) said yes. A substantial proportion of subjects (71%) said that this surface was useful. Nearly all the subjects (82%) detected the tactile surface warning of the platform edge. The 2 people who located the surface before stepping on it were both long cane users. All the subjects said they could feel the pattern of the surface, and most (82%) correctly described it as concave bumps or dots. However, only half the subjects said the surface felt rather than the ordinary flat surface. Most of the 27 subjects with residual vision (82%) said they could see the contrast between the platform and surface. 35 people (12%) said that the surface was useful. However, a high percentage of subjects (63%) said that the tactile surface was not useful. Nearly all the subjects who tested the railway platform edge said that it did not resent them with a problem. Fewer people detected the rubber version of the warning of steps surface installed at Coseley Station than the concrete slabs at Chapel Ash. The main reason for this difference is that at Coseley the 100mm x 200mm rubber tiles were installed only 3mm from the bottom of the steps and people tended to step completely over the surface. At Chapel Ash 400mm x 400mm slabs were installed 110mm from the bottom of one set of steps, and the additional 100mm of rubber surface appears to have ensured subjects did not step over it. The most frequently detected surface at Chapel Ash was installed 400mm from the top edge of the steps; this distance allowed people enough time to locate the first step after detecting the warning surface. | A high percentage of the sample (42%) said that they were concerned about not locating roads because of dropped kerbs installed at crossings points. Although most subjects (82%) said the warning surface at dropped kerbs was useful, the results suggest that the pattern was too indistinct and the layout was not helpful. It is not surprising the people found that the tactile markings were indistinct, since the recommended height of the blisters is 5mm and those tested were only 1mm to 3mm high. This illustrates again the importance of manufacturers providing more robust recommended specifications and authorities ensuring that tactile markings meet the required standards prior to installation. Although 38% of the subjects (14 people) said that the layout of the surface would be improved if enlarged, this may not be necessary if the blisters are 5mm high. In other words, the effectiveness of layout size was probably undermined because of the poor tactile quality of the installation. Nevertheless, it may well be prudent to undertake further trials with this (correctly manufactured) surface to find out the most appropriate width for dropped kerbs at road crossings. The findings suggest that visually handicapped people use the edges of tactile paving to orientate themselves in order to cross the road in a straight line. Consequently, if the edge of the blistered paving sorts into the centre of a junction, there is a risk that some visually handicapped people, in particular totally blind long cane users, will walk into the middle of the junction and not reach the other side of the road. The risk of this occurring is increased when the crossing is non-parallel. More research is required to establish whether alternative forms of tactile layouts, most especially ones which do not follow the apex of drop kerbs installed at curved crossing points, may be more appropriate. Also, attention should be given to assessing the usefulness of guidance strips to provide orientation across the highway. Of the 36 subjects, 19% (7 people) did not know what sort of road crossing they were at. Similarly, 3 people said they were on the edge of a pedestrian crossing and one person at a pelican. These results clearly support the Department of Transport's decision to investigate the use of a 'locking' mechanism to identify roads with audio indication of pelican crossings, and a tactile 'Z' marking on the apex at pelican crossings, to distinguish pedestrian crossings. It is of concern that if subjects were unaware that they were standing on a central reservation, clearly, it is not always possible to install 'steep part' style barriers at central reservations, but the finding does call into question the practice of installing blistered paving completely covering the central reservation area. The reduced pattern height of the blistered paving may well have contributed to guide dog owners' failure to stop on the central reservation. However, the reservation was only 1.2m wide, and researchers observed that large dogs could not safely stand on or sit in the limited space. Finally, the research does suggest that the surface warning of railway platform edges is very useful for visually handicapped people. However, the width of the surface should be greater than 300mm and also, the tiles should be no less than 90mm from the edge. | Further experimental work with visually handicapped people to evaluate the effectiveness of a guidance path of the appropriate dimensions should be conducted to determine the full effect of such installations.                                                                                                                                                                                                                                                                                                                                                                         | The research does suggest that the surface warning of railway platform edges is also useful for visually handicapped people. However, the width of the surface should be greater than 300mm and also, the tiles should be no less than 90mm from the edge. | Although this study has shown that the information surface installed at a bus stop is extremely useful for visually handicapped people, the height of the installation created problems for wheelchair users. It is, therefore, recommended that this surface be installed flush with the surrounding area, and tested to ensure that its high detection rate, found in previous research, remains.                                                                                                                                                                                                                                                                                                                                                                                                                                                                                                                                                                                                                                                                                                                                                                                                                                                                                                                                                                                                                                                                                                          | The study has shown that the surface to indicate steps is useful for visually handicapped people and does not present a problem to ambulant disabled individuals. In the interests of other footpath users, it is recommended that the installed surface be 400mm wide. This will allow wheelchair users to avoid encountering the surface and ensure ambulant disabled people walk a minimum distance upon it. The surface should be installed 400mm from the first step, allowing visually handicapped people a reasonable amount of time to detect the edge of the step. Finally, the layout of the surface should be wider than the actual steps to allow those approaching at an angle to detect the surface. | The edge of blistered paving is used by some blind people to provide orientation when crossing the highway. If this surface is installed to indicate a dropped kerb that points into the middle of a junction, there is a risk that visually handicapped people who use the edge for orientation will walk into the middle of the junction. This risk is increased when the crossing is parallel and also if a curved corner has been completely covered. More research is required to establish whether alternative forms of tactile surface layout can overcome this problem. Consideration should be given to evaluate the usefulness of guidance strips laid on the highway at non-parallel crossing points. | The study has shown that the tactile surface installed on Coseley Station platform was very effective in warning visually handicapped people that they were near to the edge. However, the general view was that the surface should be wider and further away from the edge. It is therefore, recommended that this surface should be a minimum of 400 mm wide. As mentioned earlier, a yellow line was painted on the platform at the station, to indicate that waiting passengers should not stand beyond it because of turbulence created by fast moving trains. During the research, debate occurred as to whether the warning surface should be laid adjacent to this line or remain near to the platform edge. However, not all station platforms have turbulence indicators, and consequently this could result in layout of the warning surface being inconsistent. A blind person would not know whether the surface was indicating a turbulence line or a platform edge. | The study has shown that tactile surfaces do provide blind people with important environmental clues even when the full impact has been lost because of incorrect layout. Further, the importance of training in order that visually handicapped people can fully utilise the tactile surfaces and also learn to distinguish the different meanings, must be emphasized.                                           | The information surface was laid completely across the rather narrow footpath, and experimental subjects had no option but to walk over it. Clearly in some circumstances it is feasible for the layout to completely cover the footpath. In order to protect authorities with the most appropriate layout for installing the information surface on outdoor footpaths, further research regarding this surface must involve an evaluation of its installation on a wider footpath, or pedestrian areas. | The findings indicate that the guidance path surface is generally acceptable to people with mobility handicaps. However, it must be remembered that the surface profile was only 2mm high, and not the recommended 5mm. Nevertheless, as the tactile marking is for use by pedestrianized areas, people without visual handicaps do not need to walk or wheel on it except when and if they have to cross the surface. People in wheelchairs had particular difficulties going uphill over the information surface installed at the bus stop. This 25mm deep surface had been installed with built up edges instead of the recommended gradual sloping edges and depth of 10mm. Installing this material to exact specifications could offer difficulty; it might be more appropriate if this surface was raised and flush with the surrounding pavement. Most people were found to have no problems when walking or wheeling on the surface to indicate steps. However, 2 people in wheelchairs did experience steering difficulties. 2 ambulant disabled people who had said the surface did not present them with problems, said that they preferred the 400mm wide surface. It may, therefore, be appropriate to install the narrower version (100mm wide) of this surface, allowing at least part of the ordinary pavement to be hazard free for wheelchair users and reducing the surface walking distance to be covered by ambulant disabled people. The material which was found unsuitable. The findings show that the railway platform edge surface does not present problems for ambulant disabled people. |       |                                                                                                                                    |                                                   |                                                                                                                 |                                                                                                                                                                                                                                                                                                                                                                                                                                                                                                                                                                                                                                                                                                                                                                                                                                                                                                                                                                                                                                                    |                                                                                                                                                                                                                                                                                                                                                                                                                                                                                                                                                                                                                                                                                                                                                                                                                                                                                                                                                                                                                                                                                                                                                                                                                                                                                                                                                                                                                                                                                                                                                                                                                                                                                                                                                                                                                                                                                                                                                                                                                                                                                                                                                                                                                                                                                                                                                                                                                                                                                                                                                                                                                                                                                                                                                                                                                                                                                                                                                                                                                                                                                                                                                                                                                                                                                                                                                                                                                                                                                                                                                                                                                                                                                                                                                                                                                                                                                                                                                                                                                                                                                                                                                                                                                                                                                                                                                                                                                                                                                                                                                                                                                                                                                                                                                                                                                                                                                                                                                                                                                                                                                                                                                                                                                                                                                                                                                                                                                                                                                                                                                                                                                                                                                                                                                                                                                                                                                                                                                                                                                                                                                                                                                                                                                                                                                                                                                                                                                                                                                                                                                                                                                                                                                                                                                                                                                                                                                                                                                                                                                                                                                                                                                                                                                                                                                                                                                                                                                                                                                                                                                                                                                                                                                                                                                                                                                                                                                                                                                                                                                                                                                                                                                                                                                                                                                                                                                                                                                                                                                                                                                                                                                                                                                                                                                                                                                                                                                                                                                                                                                                                                                                                                                                                                                                                                                                                                                                                                                                                                                                                                                                                                                                                                                                                                                                                                                                                                                                                                                                                                                                                                                                                                                                                                                                                                                                                                                                                                                                                                                                                                                                                                                                                                                                                                                                                                                                                                                                                                                                                                                                                                                                                                                                                                                                                                                                                                                                                                                                                                                                                                                                                                                                                                                                                                                                                                                                                                                                                                                                                                                                                                                                                                                                                                                                                                                                                                                                                                                                                                                                                                                                                                                                                                                                                                                                                                                                                                                                                                                                                                                                                                                                                                                                                                                                                                                                                                                                                                                                                                                                                                                                                                                                                                                                                                                                                                                                                                                                                                                                                                                                                                                                                                                                                                                                                                                                                                                                                                                                                                                                                                                                                                                                                                                                                                                                                                                                                                                                                                                                                                                                                                                                                                                                                                                                                                                                                                                                                                                                                                                                                                                                                                                                                                                                                                                                                                                                                                                                                                                                                                                                                                                                                                                                                                                                                                                                                                                                                                                                                                                                                                                                                                                                                                                                                                                                                                                                                                                                                                                                                                                                                                                                                                                                                                                                                                                                                                                                                                                                                                                                                                                                                                                                                                                                                                                                                                                                                                                                                                                                                                                                                                                                                                                                                                                                                                                                                                                                                                                                                                                                                                                                                                                                                                                                                                                                                                                                                                                                                                                                                                                                                                                                                                                                                                                                                                                                                                                                                                                                                                                                                                                                                                                                                                                                                                                                                                                                                                                                                                                                                                                                                                                                                                                                                                                                                                                                                                                                                                                                                                                                                                                                                                                                                                                                                                                                                                                                                                                                                                                                                                                                                                                                                                                                                                                                                                                                                                                                                                                                                                                                                                                                                                                                                                                                                                                                                                                                                                                                                                                                                                                                                                                                                                                                                                                                                                                                                                                                                                                                                                                                                                                                                                                                                                                                                                                                                                                                                                                                                                                                                                                                                                                                                                                                                                                                                                                                                                                                                                                                                                                                                                                                                                                                                                                                                                                                                                                                                                                                                                                                                                                                                                                                                                                                                                                                                                                                                                                                                                                                                                                                                                                                                                                                                                                                                                                                                                                                                                                                                                                                                                                                                                                                                                                                                                                                                                                                                                                                                                                                                                                                                                                                                                                                                                                                                                                                                                                                                                                                                                                                                                                                                                                                                                                                                                                                                                                                                                                                                                                                                                                                                                                                                                                                                                                                                                                                                                                                                                                                                                                                                                                                                                                                                                                                                                                                                                                                                                                                                                                                                                                                                                                                                                                                                                                                                                                                                                                                                                                                                                                                                                                                                                                                                                                                                                                                                                                                                                                                                                                                                                                                                                                                                                                                                                                                                                                                                                                                                                                                                                                                                                                                                                                                                                                                                                                                                                                                                                                                                                                                                                                                                                                                                                                                                                                                                                                                                                                                                                                                                                                                                                                                                                                                                                                                                                                                                                                                                                                                                                                                                                                                                                                                                                                                                                                                                                                                                                                                                                                                                                                                                                                                                                                                                                                                                                                                                                                                                                                                                                                                                                                                                                                                                                                                                                                                                                                                                                                                                                                                                                                                                                                                                                                                                                                                                                                                                                                                                                                                                                                                                                                                                                                                                                                                                                                                                                                                                                                                                                                                                                                                                                                                                                                                                                                                                                                                                                                                                                                                                                                                                                                                                                                                                                                                                                                                                                                                                                                                                                                                                                                                                                                                                                                                                                                                                                                                                                                                                                                                                                                                                                                                                                                                                                                                                                                                                                                                                                                                                                                                                                                                                                                                                                                                                      |
| Sidewalk                |                                                                                                                                                                               |                               |                                         | Part 3. A study to establish the public's view of the pedestrian traffic across St Peter's Square, where a guidance path had been laid, to assess whether the tactile surface was useful for visually handicapped people. To find out the general public's opinion of the tactile surface, a survey was conducted from 17th to 21st September at all the sites. One in five people in the area of each of the tactile surfaces were stopped and asked their views regarding the surface.                                                                                                        | The majority of subjects (88%) said that they travelled alone. However, when asked how they would approach a new route, just over half of guards.<br><br>49 subjects were asked whether they had ever been in accidents involving plate glass windows, pavement works, steps, crossing roads, railway platform edges or had been hit by a cycle on a footpath or shared cycleway. High proportions of people said that they had been hurt in these kinds of accidents.                                                                                                                                                                                                                                                             | Questionnaires                                                                                                                                                                                                                                        | At the site where the surface to warn of steps was located, a total of 51 people completed questionnaires. 10 people (20%) already knew that the surface was to warn visually handicapped people that they were near a flight of steps. When the intention of the surface was explained to them, six people were indifferent to the concept, and the remainder said that the idea was good or very good (35% and 53%, respectively). Most of the comments people made about the surface were positive, however, 3 people said that the pattern could cause people to trip.                                                                                                                                                                                                                                                                                                                                                                                                                                                                                                                                                                                                                                                                                                                                                                                                                                                                                                                                                                                                                                                                                                                                                                                                                                                                                                                                                                                                                                                                                                                                                                                                                                                                                                                                                                                                                                                                                                                                                                                                                                                                                                                                                                                                                                                                                                                                                                                                                                                                                                                                                                                                                                                                                                                                                                                                                                                                                                                            | Colour of the tactile surface                                                                                                                                                                                                                                                                                                                                                                                                                                                                                                                                                                                              | At the site where the surface to warn of steps was located, a total of 51 people completed questionnaires. 10 people (20%) already knew that the surface was to warn visually handicapped people that they were near a flight of steps. When the intention of the surface was explained to them, six people were indifferent to the concept, and the remainder said that the idea was good or very good (35% and 53%, respectively). Most of the comments people made about the surface were positive, however, 3 people said that the pattern could cause people to trip.                                                                                                                                                                                                                                                                                                                                                                                                                                                                                                                                                                                                                                                                                                                                                                                                                                                                                                                                                                                                                                                                                                                                                                                                                                                                                                                                                                                                                                                                                                                                                    | A total of 49 people participated in the survey regarding the use of tactile surfaces to indicate road crossings. 14 people (29%) said that the surface was to assist visually handicapped people. When advised what the purpose of the surface was, 48 people said that the concept was good or very good (51% and 47%, respectively). One person said that the idea of a tactile surface at a road crossing was bad because he thought visually handicapped people would not understand its meaning. Generally, all the comments made were positive and 13 people specifically mentioned the improved road safety aspects of such installations.                                                                                                                                                                                                                                                                                                                                                                                                                                                                                                                                                                                                                                                                                                                                                                                                                                                                                                                                                                                                                                                                                                                                                                                                                                                                                                                                                                                                                                                                                                                                                                                                                                                                                                                                                                                                                                                                                                                                                                                                                                                                                                                                                                                                                                                                                                                                                                                                                                                                                                                                                                                                                                                                                                                                                                                                                                      | 66 people were interviewed on the platform at Coseley Railway station. 10 people (15%) knew that the surface was to warn visually handicapped people that they were approaching the platform. When advised what the purpose of the surface was, 55 people said that the idea was good or very good (68% and 30%, respectively). Only one thought that the concept was bad because he thought there was a risk of tripping on the edge of the surface onto the track. Most of the comments made about the surface were positive, however, 6 people said that it should be coloured yellow. | Detectability of the tactile surface                                                                                                                                                                                                                       | Most people (82%) said that the guidance path did not present them with a mobility problem. 2 people in wheelchairs said that the path made the curb vibrations, and 1 person who used a frame said that he felt uneasy on the surface. 6 subjects, 3 of whom used wheelchairs and one a stick, were more concerned about the drainage gullies that are laid at intervals right across St Peter's Square. The information surface caused most problems (7%). 5 people using wheelchairs, 1 person using a frame and 1 person who used a stick said that the edge of the surface was too high. All of the 5 people in wheelchairs experienced difficulties in wheeling onto the surface, particularly in an uphill direction. Most subjects (82%) said that the surface used to indicate steps did not present them with any problems. However, 2 people using wheelchairs said that steering on the surface was difficult, and 1 person who used a walking frame felt uneasy. Although 2 ambulant disabled subjects said that the surface did not create any mobility problems, 1 mentioned that it hurt her feet slightly and the other said she preferred the narrower layout. Nearly all the subjects who tested the railway platform edge said that it did notresent them with a problem. The only subject who mentioned that the surface created a mobility problem said that the actual pattern did not worry her but she was concerned about tripping over the edge of the tile, which was 22mm high. | Power (torque)                                                                                                                                                                                                                                                                                                                                                                                                                                                                                                                                                                                                                                                                                                     | The average manual power output differed greatly by gender. Even so, there were men whose maximum manual power output was among the lower values.                                                                                                                                                                                                                                                                                                                                                                                                                                                                                                                                                                | Length of the sidewalk                                                                                                                                                                                                                                                                                                                                                                                                                                                                                                                                                                                                                                                                                                                                                                                                                                                                                                                                                             | There were no significant differences in the mean discomfort ratings between the high and the low maximum manual power output groups for tracks 29, 30 and 31 (distances 150mm, height of unevenness 20mm, and 10mm, respectively). Therefore, the 11 patterns of the uneven tracks other than that with Pattern 3-2 and tracks with gradients of 1%, 2%, 3%, and 4% were analyzed for mean subjective discomfort. | Height of unevenness                                                                                                                                                                                                                                                                                                                                                                                                                                                                                     | The mean discomfort ratings for 2%, 3%, and 4% longitudinal gradients plot as a nearly straight line. However, when the longitudinal gradient is 1%, the subjective discomfort is 0.8 unit greater than the corresponding rating for a 1% gradient on the line. When the longitudinal gradient is more than 2%, the subjective discomforts are the same as the ratings corresponding to the gradient on the line. This indicates that the subjective discomfort has a linear relation to the longitudinal gradient except for gradients less than 2%. When the gradient is less than 2%, the subjective discomfort tended to be greater than that estimated by the linear relation.                                                                                                                                                                                                                                                                                                                                                                                                                                                                                                                                                                                                                                                                                                                                                                                                                                                                                                                                   | Bumps | In all sections of Survey 1, the longitudinal profile was measured with a desktop profilometer with a sampling interval of 250 mm. | Cumulative level difference of points 500mm apart | The mean subjective discomfort increases with an increase in cumulative level difference of points 500mm apart. | Most correctly detected with cane: Non-slip grit + Square concrete pavers (F=21, V=91.3%). Concrete + Slate tile (F=20, V=87%). Cobblestone (F=20, V=87%).<br>Least correctly detected with cane: Slate tile + Square concrete pavers (F=12, V=52.2%). Square concrete pavers + Cobblestone (F=10, V=52.2%). Stamped concrete + Cobblestone (F=10, V=45.5%).<br>Most correctly detected with foot: Concrete + Cobblestone (F=21, V=91.3%). Slate tile + Non-slip grit (F=20, V=87%). Concrete + Slate tile (F=20, V=87%).<br>Least correctly detected with foot: Square concrete pavers + Brick pavers (F=11, V=47.8%). Square concrete pavers + Cobblestone (F=11, V=47.8%). A matching pattern test was performed by comparing matched pairs of the sidewalk materials in 23 combinations and was conducted in a semi-controlled environment to limit distractions. The researcher designed the sidewalk to allow for all materials to be arranged in such a way that 21 unique combinations of adjacent materials were provided, allowing for 2 | 1) Investigate and compare 7 construction materials often used for sidewalks. 2) Determine the best combination of "material adjacency" to produce the greatest level of detection. 3) Determine the best combination of "material adjacency" to produce the greatest level of detection. 4) Determine the best combination of "material adjacency" to produce the greatest level of detection. 5) Determine the best combination of "material adjacency" to produce the greatest level of detection. 6) Determine the best combination of "material adjacency" to produce the greatest level of detection. 7) Determine the best combination of "material adjacency" to produce the greatest level of detection. 8) Determine the best combination of "material adjacency" to produce the greatest level of detection. 9) Determine the best combination of "material adjacency" to produce the greatest level of detection. 10) Determine the best combination of "material adjacency" to produce the greatest level of detection. 11) Determine the best combination of "material adjacency" to produce the greatest level of detection. 12) Determine the best combination of "material adjacency" to produce the greatest level of detection. 13) Determine the best combination of "material adjacency" to produce the greatest level of detection. 14) Determine the best combination of "material adjacency" to produce the greatest level of detection. 15) Determine the best combination of "material adjacency" to produce the greatest level of detection. 16) Determine the best combination of "material adjacency" to produce the greatest level of detection. 17) Determine the best combination of "material adjacency" to produce the greatest level of detection. 18) Determine the best combination of "material adjacency" to produce the greatest level of detection. 19) Determine the best combination of "material adjacency" to produce the greatest level of detection. 20) Determine the best combination of "material adjacency" to produce the greatest level of detection. 21) Determine the best combination of "material adjacency" to produce the greatest level of detection. 22) Determine the best combination of "material adjacency" to produce the greatest level of detection. 23) Determine the best combination of "material adjacency" to produce the greatest level of detection. 24) Determine the best combination of "material adjacency" to produce the greatest level of detection. 25) Determine the best combination of "material adjacency" to produce the greatest level of detection. 26) Determine the best combination of "material adjacency" to produce the greatest level of detection. 27) Determine the best combination of "material adjacency" to produce the greatest level of detection. 28) Determine the best combination of "material adjacency" to produce the greatest level of detection. 29) Determine the best combination of "material adjacency" to produce the greatest level of detection. 30) Determine the best combination of "material adjacency" to produce the greatest level of detection. 31) Determine the best combination of "material adjacency" to produce the greatest level of detection. 32) Determine the best combination of "material adjacency" to produce the greatest level of detection. 33) Determine the best combination of "material adjacency" to produce the greatest level of detection. 34) Determine the best combination of "material adjacency" to produce the greatest level of detection. 35) Determine the best combination of "material adjacency" to produce the greatest level of detection. 36) Determine the best combination of "material adjacency" to produce the greatest level of detection. 37) Determine the best combination of "material adjacency" to produce the greatest level of detection. 38) Determine the best combination of "material adjacency" to produce the greatest level of detection. 39) Determine the best combination of "material adjacency" to produce the greatest level of detection. 40) Determine the best combination of "material adjacency" to produce the greatest level of detection. 41) Determine the best combination of "material adjacency" to produce the greatest level of detection. 42) Determine the best combination of "material adjacency" to produce the greatest level of detection. 43) Determine the best combination of "material adjacency" to produce the greatest level of detection. 44) Determine the best combination of "material adjacency" to produce the greatest level of detection. 45) Determine the best combination of "material adjacency" to produce the greatest level of detection. 46) Determine the best combination of "material adjacency" to produce the greatest level of detection. 47) Determine the best combination of "material adjacency" to produce the greatest level of detection. 48) Determine the best combination of "material adjacency" to produce the greatest level of detection. 49) Determine the best combination of "material adjacency" to produce the greatest level of detection. 50) Determine the best combination of "material adjacency" to produce the greatest level of detection. 51) Determine the best combination of "material adjacency" to produce the greatest level of detection. 52) Determine the best combination of "material adjacency" to produce the greatest level of detection. 53) Determine the best combination of "material adjacency" to produce the greatest level of detection. 54) Determine the best combination of "material adjacency" to produce the greatest level of detection. 55) Determine the best combination of "material adjacency" to produce the greatest level of detection. 56) Determine the best combination of "material adjacency" to produce the greatest level of detection. 57) Determine the best combination of "material adjacency" to produce the greatest level of detection. 58) Determine the best combination of "material adjacency" to produce the greatest level of detection. 59) Determine the best combination of "material adjacency" to produce the greatest level of detection. 60) Determine the best combination of "material adjacency" to produce the greatest level of detection. 61) Determine the best combination of "material adjacency" to produce the greatest level of detection. 62) Determine the best combination of "material adjacency" to produce the greatest level of detection. 63) Determine the best combination of "material adjacency" to produce the greatest level of detection. 64) Determine the best combination of "material adjacency" to produce the greatest level of detection. 65) Determine the best combination of "material adjacency" to produce the greatest level of detection. 66) Determine the best combination of "material adjacency" to produce the greatest level of detection. 67) Determine the best combination of "material adjacency" to produce the greatest level of detection. 68) Determine the best combination of "material adjacency" to produce the greatest level of detection. 69) Determine the best combination of "material adjacency" to produce the greatest level of detection. 70) Determine the best combination of "material adjacency" to produce the greatest level of detection. 71) Determine the best combination of "material adjacency" to produce the greatest level of detection. 72) Determine the best combination of "material adjacency" to produce the greatest level of detection. 73) Determine the best combination of "material adjacency" to produce the greatest level of detection. 74) Determine the best combination of "material adjacency" to produce the greatest level of detection. 75) Determine the best combination of "material adjacency" to produce the greatest level of detection. 76) Determine the best combination of "material adjacency" to produce the greatest level of detection. 77) Determine the best combination of "material adjacency" to produce the greatest level of detection. 78) Determine the best combination of "material adjacency" to produce the greatest level of detection. 79) Determine the best combination of "material adjacency" to produce the greatest level of detection. 80) Determine the best combination of "material adjacency" to produce the greatest level of detection. 81) Determine the best combination of "material adjacency" to produce the greatest level of detection. 82) Determine the best combination of "material adjacency" to produce the greatest level of detection. 83) Determine the best combination of "material adjacency" to produce the greatest level of detection. 84) Determine the best combination of "material adjacency" to produce the greatest level of detection. 85) Determine the best combination of "material adjacency" to produce the greatest level of detection. 86) Determine the best combination of "material adjacency" to produce the greatest level of detection. 87) Determine the best combination of "material adjacency" to produce the greatest level of detection. 88) Determine the best combination of "material adjacency" to produce the greatest level of detection. 89) Determine the best combination of "material adjacency" to produce the greatest level of detection. 90) Determine the best combination of "material adjacency" to produce the greatest level of detection. 91) Determine the best combination of "material adjacency" to produce the greatest level of detection. 92) Determine the best combination of "material adjacency" to produce the greatest level of detection. 93) Determine the best combination of "material adjacency" to produce the greatest level of detection. 94) Determine the best combination of "material adjacency" to produce the greatest level of detection. 95) Determine the best combination of "material adjacency" to produce the greatest level of detection. 96) Determine the best combination of "material adjacency" to produce the greatest level of detection. 97) Determine the best combination of "material adjacency" to produce the greatest level of detection. 98) Determine the best combination of "material adjacency" to produce the greatest level of detection. 99) Determine the best combination of "material adjacency" to produce the greatest level of detection. 100) Determine the best combination of "material adjacency" to produce the greatest level of detection. 101) Determine the best combination of "material adjacency" to produce the greatest level of detection. 102) Determine the best combination of "material adjacency" to produce the greatest level of detection. 103) Determine the best combination of "material adjacency" to produce the greatest level of detection. 104) Determine the best combination of "material adjacency" to produce the greatest level of detection. 105) Determine the best combination of "material adjacency" to produce the greatest level of detection. 106) Determine the best combination of "material adjacency" to produce the greatest level of detection. 107) Determine the best combination of "material adjacency" to produce the greatest level of detection. 108) Determine the best combination of "material adjacency" to produce the greatest level of detection. 109) Determine the best combination of "material adjacency" to produce the greatest level of detection. 110) Determine the best combination of "material adjacency" to produce the greatest level of detection. 111) Determine the best combination of "material adjacency" to produce the greatest level of detection. 112) Determine the best combination of "material adjacency" to produce the greatest level of detection. 113) Determine the best combination of "material adjacency" to produce the greatest level of detection. 114) Determine the best combination of "material adjacency" to produce the greatest level of detection. 115) Determine the best combination of "material adjacency" to produce the greatest level of detection. 116) Determine the best combination of "material adjacency" to produce the greatest level of detection. 117) Determine the best combination of "material adjacency" to produce the greatest level of detection. 118) Determine the best combination of "material adjacency" to produce the greatest level of detection. 119) Determine the best combination of "material adjacency" to produce the greatest level of detection. 120) Determine the best combination of "material adjacency" to produce the greatest level of detection. 121) Determine the best combination of "material adjacency" to produce the greatest level of detection. 122) Determine the best combination of "material adjacency" to produce the greatest level of detection. 123) Determine the best combination of "material adjacency" to produce the greatest level of detection. 124) Determine the best combination of "material adjacency" to produce the greatest level of detection. 125) Determine the best combination of "material adjacency" to produce the greatest level of detection. 126) Determine the best combination of "material adjacency" to produce the greatest level of detection. 127) Determine the best combination of "material adjacency" to produce the greatest level of detection. 128) Determine the best combination of "material adjacency" to produce the greatest level of detection. 129) Determine the best combination of "material adjacency" to produce the greatest level of detection. 130) Determine the best combination of "material adjacency" to produce the greatest level of detection. 131) Determine the best combination of "material adjacency" to produce the greatest level of detection. 132) Determine the best combination of "material adjacency" to produce the greatest level of detection. 133) Determine the best combination of "material adjacency" to produce the greatest level of detection. 134) Determine the best combination of "material adjacency" to produce the greatest level of detection. 135) Determine the best combination of "material adjacency" to produce the greatest level of detection. 136) Determine the best combination of "material adjacency" to produce the greatest level of detection. 137) Determine the best combination of "material adjacency" to produce the greatest level of detection. 138) Determine the best combination of "material adjacency" to produce the greatest level of detection. 139) Determine the best combination of "material adjacency" to produce the greatest level of detection. 140) Determine the best combination of "material adjacency" to produce the greatest level of detection. 141) Determine the best combination of "material adjacency" to produce the greatest level of detection. 142) Determine the best combination of "material adjacency" to produce the greatest level of detection. 143) Determine the best combination of "material adjacency" to produce the greatest level of detection. 144) Determine the best combination of "material adjacency" to produce the greatest level of detection. 145) Determine the best combination of "material adjacency" to produce the greatest level of detection. 146) Determine the best combination of "material adjacency" to produce the greatest level of detection. 147) Determine the best combination of "material adjacency" to produce the greatest level of detection. 148) Determine the best combination of "material adjacency" to produce the greatest level of detection. 149) Determine the best combination of "material adjacency" to produce the greatest level of detection. 150) Determine the best combination of "material adjacency" to produce the greatest level of detection. 151) Determine the best combination of "material adjacency" to produce the greatest level of detection. 152) Determine the best combination of "material adjacency" to produce the greatest level of detection. 153) Determine the best combination of "material adjacency" to produce the greatest level of detection. 154) Determine the best combination of "material adjacency" to produce the greatest level of detection. 155) Determine the best combination of "material adjacency" to produce the greatest level of detection. 156) Determine the best combination of "material adjacency" to produce the greatest level of detection. 157) Determine the best combination of "material adjacency" to produce the greatest level of detection. 158) Determine the best combination of "material adjacency" to produce the greatest level of detection. 159) Determine the best combination of "material adjacency" to produce the greatest level of detection. 160) Determine the best combination of "material adjacency" to produce the greatest level of detection. 161) Determine the best combination of "material adjacency" to produce the greatest level of detection. 162) Determine the best combination of "material adjacency" to produce the greatest level of detection. 163) Determine the best combination of "material adjacency" to produce the greatest level of detection. 164) Determine the best combination of "material adjacency" to produce the greatest level of detection. 165) Determine the best combination of "material adjacency" to produce the greatest level of detection. 166) Determine the best combination of "material adjacency" to produce the greatest level of detection. 167) Determine the best combination of "material adjacency" to produce the greatest level of detection. 168) Determine the best combination of "material adjacency" to produce the greatest level of detection. 169) Determine the best combination of "material adjacency" to produce the greatest level of detection. 170) Determine the best combination of "material adjacency" to produce the greatest level of detection. 171) Determine the best combination of "material adjacency" to produce the greatest level of detection. 172) Determine the best combination of "material adjacency" to produce the greatest level of detection. 173) Determine the best combination of "material adjacency" to produce the greatest level of detection. 174) Determine the best combination of "material adjacency" to produce the greatest level of detection. 175) Determine the best combination of "material adjacency" to produce the greatest level of detection. 176) Determine the best combination of "material adjacency" to produce the greatest level of detection. 177) Determine the best combination of "material adjacency" to produce the greatest level of detection. 178) Determine the best combination of "material adjacency" to produce the greatest level of detection. 179) Determine the best combination of "material adjacency" to produce the greatest level of detection. 180) Determine the best combination of "material adjacency" to produce the greatest level of detection. 181) Determine the best combination of "material adjacency" to produce the greatest level of detection. 182) Determine the best combination of "material adjacency" to produce the greatest level of detection. 183) Determine the best combination of "material adjacency" to produce the greatest level of detection. 184) Determine the best combination of "material adjacency" to produce the greatest level of detection. 185) Determine the best combination of "material adjacency" to produce the greatest level of detection. 186) Determine the best combination of "material adjacency" to produce the greatest level of detection. 187) Determine the best combination of "material adjacency" to produce the greatest level of detection. 188) Determine the best combination of "material adjacency" to produce the greatest level of detection. 189) Determine the best combination of "material adjacency" to produce the greatest level of detection. 190) Determine the best combination of "material adjacency" to produce the greatest level of detection. 191) Determine the best combination of "material adjacency" to produce the greatest level of detection. 192) Determine the best combination of "material adjacency" to produce the greatest level of detection. 193) Determine the best combination of "material adjacency" to produce the greatest level of detection. 194) Determine the best combination of "material adjacency" to produce the greatest level of detection. 195) Determine the best combination of "material adjacency" to produce the greatest level of detection. 196) Determine the best combination of "material adjacency" to produce the greatest level of detection. 197) Determine the best combination of "material adjacency" to produce the greatest level of detection. 198) Determine the best combination of "material adjacency" to produce the greatest level of detection. 199) Determine the best combination of "material adjacency" to produce the greatest level of detection. 200) Determine the best combination of "material adjacency" to produce the greatest level of detection. 201) Determine the best combination of "material adjacency" to produce the greatest level of detection. 202) Determine the best combination of "material adjacency" to produce the greatest level of detection. 203) Determine the best combination of "material adjacency" to produce the greatest level of detection. 204) Determine the best combination of "material adjacency" to produce the greatest level of detection. 205) Determine the best combination of "material adjacency" to produce the greatest level of detection. 206) Determine the best combination of "material adjacency" to produce the greatest level of detection. 207) Determine the best combination of "material adjacency" to produce the greatest level of detection. 208) Determine the best combination of "material adjacency" to produce the greatest level of detection. 209) Determine the best combination of "material adjacency" to produce the greatest level of detection. 210) Determine the best combination of "material adjacency" to produce the greatest level of detection. 211) Determine the best combination of "material adjacency" to produce the greatest level of detection. 212) Determine the best combination of "material adjacency" to produce the greatest level of detection. 213) Determine the best combination of "material adjacency" to produce the greatest level of detection. 214) Determine the best combination of "material adjacency" to produce the greatest level of detection. 215) Determine the best combination of "material adjacency" to produce the greatest level of detection. 216) Determine the best combination of "material adjacency" to produce the greatest level of detection. 217) Determine the best combination of "material adjacency" to produce the greatest level of detection. 218) Determine the best combination of "material adjacency" to produce the greatest level of detection. 219) Determine the best combination of "material adjacency" to produce the greatest level of detection. 220) Determine the best combination of "material adjacency" to produce the greatest level of detection. 221) Determine the best combination of "material adjacency" to produce the greatest level of detection. 222) Determine the best combination of "material adjacency" to produce the greatest level of detection. 223) Determine the best combination of "material adjacency" to produce the greatest level of detection. 224) Determine the best combination of "material adjacency" to produce the greatest level of detection. 225) Determine the best combination of "material adjacency" to produce the greatest level of detection. 226) Determine the best combination of "material adjacency" to produce the greatest level of detection. 227) Determine the best combination of "material adjacency" to produce the greatest level of detection. 228) Determine the best combination of "material adjacency" to produce the greatest level of detection. 229) Determine the best combination of "material adjacency" to produce the greatest level of detection. 230) Determine the best combination of "material adjacency" to produce the greatest level of detection. 231) Determine the best combination of "material adjacency" to produce the greatest level of detection. 232) Determine the best combination of "material adjacency" to produce the greatest level of detection. 233) Determine the best combination of "material adjacency" to produce the greatest level of detection. 234) Determine the best combination of "material adjacency" to produce the greatest level of detection. 235) Determine the best combination of "material adjacency" to produce the greatest level of detection. 236) Determine the best combination of "material adjacency" to produce the greatest level of detection. 237) Determine the best combination of "material adjacency" to produce the greatest level of detection. 238) Determine the best combination of "material adjacency" to produce the greatest level of detection. 239) Determine the best combination of "material adjacency" to produce the greatest level of detection. 240) Determine the best combination of "material adjacency" to produce the greatest level of detection. 241) Determine the best combination of "material adjacency" to produce the greatest level of detection. 242) Determine the best combination of "material adjacency" to produce the greatest level of detection. 243) Determine the best combination of "material adjacency" to produce the greatest level of detection. 244) Determine the best combination of "material adjacency" to produce the greatest level of detection. 245) Determine the best combination of "material adjacency" to produce the greatest level of detection. 246) Determine the best combination of "material adjacency" to produce the greatest level of detection. 247) Determine the best combination of "material adjacency" to produce the greatest level of detection. 248) Determine the best combination of "material adjacency" to produce the greatest level of detection. 249) Determine the best combination of "material adjacency" to produce the greatest level of detection. 250) Determine the best combination of "material adjacency" to produce the greatest level of detection. 251) Determine the best combination of "material adjacency" to produce the greatest level of detection. 252) Determine the best combination of "material adjacency" to produce the greatest level of detection. 253) Determine the best combination of "material adjacency" to produce the greatest level of detection. 254) Determine the best combination of "material adjacency" to produce the greatest level of detection. 255) Determine the best combination of "material adjacency" to produce the greatest level of detection. 256) Determine the best combination of "material adjacency" to produce the greatest level of detection. 257) Determine the best combination of "material adjacency" to produce the greatest level of detection. 258) Determine the best combination of "material adjacency" to produce the greatest level of detection. 259) Determine the best combination of "material adjacency" to produce the greatest level of detection. 260) Determine the best combination of "material adjacency" to produce the greatest level of detection. 261) Determine the best combination of "material adjacency" to produce the greatest level of detection. 262) Determine the best combination of "material adjacency" to produce the greatest level of detection. 263) Determine the best combination of "material adjacency" to produce the greatest level of detection. 264) Determine the best combination of "material adjacency" to produce the greatest level of detection. 265) Determine the best combination of "material adjacency" to produce the greatest level of detection. 266) Determine the best combination of "material adjacency" to produce the greatest level of detection. 267) Determine the best combination of "material adjacency" to produce the greatest level of detection. 268) Determine the best combination of "material adjacency" to produce the greatest level of detection. 269) Determine the best combination of "material adjacency" to produce the greatest level of detection. 270) Determine the best combination of "material adjacency" to produce the greatest level of detection. 271) Determine the best combination of "material adjacency" to produce the greatest level of detection. 272) Determine the best combination of "material adjacency" to produce the greatest level of detection. 273) Determine the best combination of "material adjacency" to produce the greatest level of detection. 274) Determine the best combination of "material adjacency" to produce the greatest level of detection. 275) Determine the best combination of "material adjacency" to produce the greatest level of detection. 276) Determine the best combination of "material adjacency" to produce the greatest level of detection. 277) Determine the best combination of "material adjacency" to produce the greatest level of detection. 278) Determine the best combination of "material adjacency" to produce the greatest level of detection. 279) Determine the best combination of "material adjacency" to produce the greatest level of detection. 280) Determine the best combination of "material adjacency" to produce the greatest level of detection. 281) Determine the best combination of "material adjacency" to produce the greatest level of detection. 282) Determine the best combination of "material adjacency" to produce the greatest level of detection. 283) Determine the best combination of "material adjacency" to produce the greatest level of detection. 284) Determine the best combination of "material adjacency" to produce the greatest level of detection. 285) Determine the best combination of "material adjacency" to produce the greatest level of detection. 286) Determine the best combination of "material adjacency" to produce the greatest level of detection. 287) Determine the best combination of "material adjacency" to produce the greatest level of detection. 288) Determine the best combination of "material adjacency" to produce the greatest level of detection. 289) Determine the best combination of "material adjacency" to produce the greatest level of detection. 290) Determine the best combination of "material adjacency" to produce the greatest level of detection. 291) Determine the best combination of "material adjacency" to produce the greatest level of detection. 292) Determine the best combination of "material adjacency" to produce the greatest level of detection. 293) Determine the best combination of "material adjacency" to produce the greatest level of detection. 294) Determine the best combination of "material adjacency" to produce the greatest level of detection. 295) Determine the best combination of "material adjacency" to produce the greatest level of detection. 296) Determine the best combination of "material adjacency" to produce the greatest level of detection. 297) Determine the best combination of "material adjacency" to produce the greatest level of detection. 298) Determine the best combination of "material adjacency" to produce the greatest level of detection. 299) Determine the best combination of "material adjacency" to produce the greatest level of detection. 300) Determine the best combination of "material adjacency" to produce the greatest level of detection. 301) Determine the best combination of "material adjacency" to produce the greatest level of detection. 302) Determine the best combination of "material adjacency" to produce the greatest level of detection. 303) Determine the best combination of "material adjacency" to produce the greatest level of detection. 304) Determine the best combination of "material adjacency" to produce the greatest level of detection. 305) Determine the best combination of "material adjacency" to produce the greatest level of detection. 306) Determine the best combination of "material adjacency" to produce the greatest level of detection. 307) Determine the best combination of "material adjacency" to produce the greatest level of detection. 308) Determine the best combination of "material adjacency" to produce the greatest level of detection. 309) Determine the best combination of "material adjacency" to produce the greatest level of detection. 310) Determine the best combination of "material adjacency" to produce the greatest level of detection. 311) Determine the best combination of "material adjacency" to produce the greatest level of detection. 312) Determine the best combination of "material adjacency" to produce the greatest level of detection. 313) Determine the best combination of "material adjacency" to produce the greatest level of detection. 314) Determine the best combination of "material adjacency" to produce the greatest level of detection. 315) Determine the best combination of "material adjacency" to produce the greatest level of detection. 316) Determine the best combination of "material adjacency" to produce the greatest level of detection. 317) Determine the best combination of "material adjacency" to produce the greatest level of detection. 318) Determine the best combination of "material adjacency" to produce the greatest level of detection. 319) Determine the best combination of "material adjacency" to produce the greatest level of detection. 320) Determine the best combination of "material adjacency" to produce the greatest level of detection. 321) Determine the best combination of "material adjacency" to produce the greatest level of detection. 322) Determine the best combination of "material adjacency" to produce the greatest level of detection. 323) Determine the best combination of "material adjacency" to produce the greatest level of detection. 324) Determine the best combination of "material adjacency" to produce the greatest level of detection. 325) Determine the best combination of "material adjacency" to produce the greatest level of detection. 326) Determine the best combination of "material |
