# Supplementary material
Source: publisher figshare collection journal article supplement (https://tandf.figshare.com/articles/dataset/_/5982280)
Supplement: Supplementary file 4 [file 1]

| TYPE OF INFRASTRUCTURES              | REFERENCE                                                                                                                                                                                                                                         | ORIGIN/CITY                                                                             | TARGETED INDIVIDUALS                     | AIM / OBJECTIVES / HYPOTHESES                                                                                                                                                                                                                                                                                                                                                                                                                                                                                                                                                                                                                                                                                                               | JUSTIFICATION                                                                                                                                                                                                                                                                                                                                                                                                                                                                                                                                                                                                                                                                                                                                                                                                                                                                                                                                                                                                                                          | PARTICIPANTS                                                                                                                                                                                                                                                                                                                                                                                                                                                                                                                                                                                                                                                                                                                                                                                    | METHODOLOGY / SET UP                                                                                                                                                                                                                                                                                                                                                                                                                                                                                                                                                         | RESEARCH TOOLS                                                                                                                                                                                                                                                                                                                                                                                                                                                                                                                                | VARIABLES / INDICATORS STUDIED                                                                                                                                                                                                                                                                                                                                                                                                                                                                                                                                                                                                                                                                                                                                                                                                                                                                                                                                                                                                                                                                                                                                                                  | ANALYSIS / INTERPRETATION                                                                                                                                                                                                                                                                                                                                                 | RESULTS                                                                                                                                                                                                                                                                                                                                                                                                                                                                                                                                                                                                              | STATED LIMITS                                                                                                                                                                                                                                                                                                                                                                                                                                                                                                                      | CONCLUSION (THE BEST INFRASTRUCTURE/PRACTICE)                                                                                                                                                                                                                                                  | QUALITY                                                                                                                                                                                                                                                                                                                                                                                                                                                                                                                              |                                                                                                                                                                                                                                                                                                                                                           |    |
|--------------------------------------|---------------------------------------------------------------------------------------------------------------------------------------------------------------------------------------------------------------------------------------------------|-----------------------------------------------------------------------------------------|------------------------------------------|---------------------------------------------------------------------------------------------------------------------------------------------------------------------------------------------------------------------------------------------------------------------------------------------------------------------------------------------------------------------------------------------------------------------------------------------------------------------------------------------------------------------------------------------------------------------------------------------------------------------------------------------------------------------------------------------------------------------------------------------|--------------------------------------------------------------------------------------------------------------------------------------------------------------------------------------------------------------------------------------------------------------------------------------------------------------------------------------------------------------------------------------------------------------------------------------------------------------------------------------------------------------------------------------------------------------------------------------------------------------------------------------------------------------------------------------------------------------------------------------------------------------------------------------------------------------------------------------------------------------------------------------------------------------------------------------------------------------------------------------------------------------------------------------------------------|-------------------------------------------------------------------------------------------------------------------------------------------------------------------------------------------------------------------------------------------------------------------------------------------------------------------------------------------------------------------------------------------------------------------------------------------------------------------------------------------------------------------------------------------------------------------------------------------------------------------------------------------------------------------------------------------------------------------------------------------------------------------------------------------------|------------------------------------------------------------------------------------------------------------------------------------------------------------------------------------------------------------------------------------------------------------------------------------------------------------------------------------------------------------------------------------------------------------------------------------------------------------------------------------------------------------------------------------------------------------------------------|-----------------------------------------------------------------------------------------------------------------------------------------------------------------------------------------------------------------------------------------------------------------------------------------------------------------------------------------------------------------------------------------------------------------------------------------------------------------------------------------------------------------------------------------------|-------------------------------------------------------------------------------------------------------------------------------------------------------------------------------------------------------------------------------------------------------------------------------------------------------------------------------------------------------------------------------------------------------------------------------------------------------------------------------------------------------------------------------------------------------------------------------------------------------------------------------------------------------------------------------------------------------------------------------------------------------------------------------------------------------------------------------------------------------------------------------------------------------------------------------------------------------------------------------------------------------------------------------------------------------------------------------------------------------------------------------------------------------------------------------------------------|---------------------------------------------------------------------------------------------------------------------------------------------------------------------------------------------------------------------------------------------------------------------------------------------------------------------------------------------------------------------------|----------------------------------------------------------------------------------------------------------------------------------------------------------------------------------------------------------------------------------------------------------------------------------------------------------------------------------------------------------------------------------------------------------------------------------------------------------------------------------------------------------------------------------------------------------------------------------------------------------------------|------------------------------------------------------------------------------------------------------------------------------------------------------------------------------------------------------------------------------------------------------------------------------------------------------------------------------------------------------------------------------------------------------------------------------------------------------------------------------------------------------------------------------------|------------------------------------------------------------------------------------------------------------------------------------------------------------------------------------------------------------------------------------------------------------------------------------------------|--------------------------------------------------------------------------------------------------------------------------------------------------------------------------------------------------------------------------------------------------------------------------------------------------------------------------------------------------------------------------------------------------------------------------------------------------------------------------------------------------------------------------------------|-----------------------------------------------------------------------------------------------------------------------------------------------------------------------------------------------------------------------------------------------------------------------------------------------------------------------------------------------------------|----|
|                                      | Amosun, S. L. Burgess, T., Groenewald, L. & Hodgson, T. (2007). Are elderly pedestrians allowed enough time at pedestrian crossings in Cape Town, South Africa? <i>Physiotherapy Theory and Practice</i> , 23(3), 322-332.                        | Cape Town, South Africa                                                                 | Elderly                                  | 1) Determine the walking speed required to safely clear pedestrian crossings controlled by traffic lights close to selected homes for older persons in the Cape Metropole of Cape Town, South Africa. 2) Determine the maximal walking speed to unloaded and loaded conditions of residents in the selected homes. 3) Determine if there is a difference between the two conditions of unloaded and loaded walking. 4) Descriptively compare the required walking speeds to actual walking speeds in unloaded and loaded conditions. 5) Assess the reported emotions of the residents and compare those individuals who walked slower than the recommended velocity of 1.2 m/s (unloaded condition) with those residents who walked faster. | Among older persons aged 65 years and over, the reports revealed that motor vehicle accidents involving pedestrians have been the highest causes of non-natural death from 2001 (19.6%) to 2004 (46.5%). The National Department of Transport of South Africa developed a road safety strategy titled "The Road to Safety 2005-2005." This is a five year plan aimed at reducing road traffic accidents, fatalities, and injuries. The time allowed by the Traffic Department in Cape Town, South Africa, for pedestrians to cross a road at traffic-light-controlled pedestrian crossings was based on a walking speed of 1.2 m/s, similar to the walking speed of 1.2 m/s recommended by the Department of Transportation in the United States of America. Paying attention to research reports that the walking speeds of elderly pedestrians were often slower for the time interval allowed at pedestrian crossings controlled by traffic lights in some countries, the elderly population in South Africa may be at risk when crossing the road. | n=147 living in 4 homes, for older persons (chosen for their closeness to shopping malls). Mean age: 78.8 ± 7 years (65-93 years); 2 of them did not walk outside their home. 9 once a week, 4 twice a week, 4 more than twice a week, 17 once a day, 4 twice a day, 7 more than twice a day. Inclusion criteria: ≥ 65 years and ability to walk independently. Exclusion criteria: wheelchair users, existing neurological deficit, visual acuity score of 6/18 or lower on the Snellen Chart. The study was advertised through leaflets, posters, and information sessions at day residents, mPv volunteers, n=13 residents, who did not comply and/or illness. The participants were interviewed to obtain information on age, current medical history and medication, and surgical history. | A questionnaire was administered by interview                                                                                                                                                                                                                                                                                                                                                                                                                                                                                                                                | Emotions regarding their own safety when crossing the road                                                                                                                                                                                                                                                                                                                                                                                                                                                                                    | Statistical analyses were performed by using Statistica Software (StatSoft Inc., 2002). The first, second and fourth arms were accomplished through determination of the means and standard deviations. The third arm was accomplished through a t-test with a level of significance p < 0.05. Finally, the fifth arm was accomplished through a chi-square test with the level of significance once again at p < 0.05.                                                                                                                                                                                                                                                                                                                                                                                                                                                                                                                                                                                                                                                                                                                                                                         | The mean maximal walking speed of the participants was faster than that recommended at pedestrian crossings, and there was no significant difference between the mean walking speeds of the participants and the objective measurements of pedestrian clearance intervals and maximal walking speed.                                                                      | Though the measured pedestrian crossing intervals were inconsistent, enough time was allowed for elderly pedestrians at most of the selected pedestrian crossings.                                                                                                                                                                                                                                                                                                                                                                                                                                                   | 43                                                                                                                                                                                                                                                                                                                                                                                                                                                                                                                                 |                                                                                                                                                                                                                                                                                                |                                                                                                                                                                                                                                                                                                                                                                                                                                                                                                                                      |                                                                                                                                                                                                                                                                                                                                                           |    |
|                                      | Barlow, J. M., Bentzen, B.L., & Bond, T. (2005). Blind pedestrian and the changing technology and geometry of signalized intersections: Safety, orientation, and independence. <i>Journal of Visual Impairment and Blindness</i> 99 (10), 1-9     | Portland (Oregon), Cambridge (Massachusetts), Charlotte (North Carolina), United States | Visually impaired (wheelchair users)     | Investigate the safety, orientation, and independence of pedestrians who are blind while crossing at complex, signalized intersections. Provide a descriptive analysis of broad measures of safety, orientation, and the need for assistance or intervention for safety in crossing, and implications for orientation and mobility (OSM) instruction.                                                                                                                                                                                                                                                                                                                                                                                       | Intersection geometry and signalization are designed to move vehicles as rapidly and efficiently as possible, but pay minimal attention to the movement of pedestrians (including the visually impaired). Intersections are wide, commonly more than four lanes, often with designated lanes for right-turning or left-turning. In addition, fluctuations in the flow and volume of traffic and the lack of vehicular lanes parallel to some crosswalks may contribute to disorientation, since the sounds of vehicles are used to determine the location of crosswalks, to establish a heading toward the opposite side of the street, and to travel straight across the street.                                                                                                                                                                                                                                                                                                                                                                      | n = 16 for 8 or 9 crossings in the 3 cities (in total n = 48, 30 men, mean age = 41.60 years, range age 46- 207.90 years old) using a cane. They were not used and were unfamiliar with the tested streets.                                                                                                                                                                                                                                                                                                                                                                                                                                                                                                                                                                                     | Experimental design                                                                                                                                                                                                                                                                                                                                                                                                                                                                                                                                                          | Find and use pushbuttons                                                                                                                                                                                                                                                                                                                                                                                                                                                                                                                      | Participants looked for, found, and pushed the button on only 16.3% of the crossings in Portland and not on one in Charlotte.                                                                                                                                                                                                                                                                                                                                                                                                                                                                                                                                                                                                                                                                                                                                                                                                                                                                                                                                                                                                                                                                   | Participants use pushbuttons only when they know they are there and where to find them. Proposed strategy: travel to the edge of the street, maintain alignment, assess street crossing and locate tactile cue for realignment, use systematic search patterns to determine if there is a pushbutton, and then return to the predetermined location and tactile cue.      | Updated techniques for evaluating intersections, using pedestrian pushbuttons, aligning to cross, and determining the appropriate crossing time are needed.                                                                                                                                                                                                                                                                                                                                                                                                                                                          | Participants were more successful in starting to cross within the crosswalk when they used the location of curb ramps to indicate the location of the crosswalk (need for a cane for alignment).                                                                                                                                                                                                                                                                                                                                   | Most participants fail to push the buttons or, when they don't exist, they don't realize it is their turn to cross. Pedestrian phase on recall might be more effective for visually impaired individuals.                                                                                      | 35                                                                                                                                                                                                                                                                                                                                                                                                                                                                                                                                   |                                                                                                                                                                                                                                                                                                                                                           |    |
|                                      | Bennett, S., Kirby, R.L., & MacDonald, B. (2009). Wheelchair accessibility: Descriptive survey of curb ramps in an urban area. <i>Disability and Rehabilitation: Assistive Technology</i> 4(1): 17-23.                                            | Halifax, Nova Scotia, Canada                                                            | Mobility impaired (wheelchair dependent) | Determine the extent to which curb ramps in an urban area of curb ramp met a set of wheelchair accessibility guidelines.                                                                                                                                                                                                                                                                                                                                                                                                                                                                                                                                                                                                                    | At road intersections, existing guidelines suggest that there should be a means to ease the transition from the elevated sidewalk to the road for pedestrians and wheelchair users. Among the options available, the curb ramp is a common one. Most often in a curb ramp, the surface gradually slopes downward to the sidewalk to the gutter level. The curb ramp may be perpendicular, parallel or diagonal to the curb. Despite the widespread recognition of the importance of curb ramps and the availability of comprehensive guidelines regarding their design, we have observed a number of intersections in our city (and other cities we have visited) with a variety of design or maintenance problems that might present barriers to wheelchair users.                                                                                                                                                                                                                                                                                    | N/A                                                                                                                                                                                                                                                                                                                                                                                                                                                                                                                                                                                                                                                                                                                                                                                             | For each of the 79 evaluated intersections, the measurements of distance and slope were performed and each criterion was evaluated with a score of 1 if the intersection met the criterion and 0 if it did not. Digital photographs were taken. Qualitative measurements were based on the consensus of two investigators (SB, BM).                                                                                                                                                                                                                                          | Descriptive statistics were calculated. Percent compliance was determined for each criterion and for a combination of all eight characteristics. The scores for each of the eight criteria were also summed to produce an overall score (0-8) for each curb ramp. Statistics related to Criteria 2-9 were only assessed for intersections where there was a curb ramp.                                                                                                                                                                        | Mean starting delay (3 cities) = 6.4s. Across the 3 cities, 48.6% of the crossings started during the walk interval, and 26.0% of all independent crossings ended after the onset of the perpendicular traffic. Portland and Charlotte: 19.2% began crossing during the walk interval of the pedestrian-actuated crossings compared to 71.7% where the pedestrian phase was on recall. Portland: 24.6% began crossing during the walk interval of pedestrian-actuated crossings, and 50.0% of those crossings, they failed to complete their crossings before the onset of perpendicular traffic. When the pedestrian phase was on recall, 82.1% started during the walk interval, and 37.8% completed crossing after the onset of perpendicular traffic. Charlotte: Pedestrian-actuated crossings resulted in 11.4% of the crossings starting during the walk interval, with only 6.1% completed crossing after the onset of perpendicular traffic, compared with 78.8% of the crossings ending after the onset of perpendicular traffic, with an overall score (0-8) for each curb ramp. Statistics related to Criteria 2-9 were only assessed for intersections where there was a curb ramp. | 80.9% of the choices to cross the street were made independently. Requests for assistance: 53% for starting location, 60% for alignment, and 73% for determining when to start crossing. Once the participants were in the street, interventions were much more common than requests, with only 7% of the assistance occurring as a result of the participants' requests. | Although the criteria selected had excellent content an concurrent validity, the reliability and construct validity for the criteria are unknown. The guidelines on which they base their criteria were from North American ones. These data must be generalized with caution in other parts of the world.                                                                                                                                                                                                                                                                                                           | The mean (+SD) overall score was 5.6 (+/- 1.1). Only 2 (2.6%) of the intersections met all eight criteria. However, 61% of the intersections scored more than 6 of a possible 8 and the mean score was 5.6. For most wheelchair users, even a curb ramp with some problems is preferable to missing a curb (usually 15 cm high in our city without a ramp).                                                                                                                                                                        | This was often because the curb ramp was of the diagonal type, with two sidewalks sharing the access to the same curb ramp. Even with very wide diagonal curbs that wrapped around a corner, a wheelchair user would need to change direction to approach the ramp-gutter transition squarely. | 34                                                                                                                                                                                                                                                                                                                                                                                                                                                                                                                                   |                                                                                                                                                                                                                                                                                                                                                           |    |
| Pedestrian crossing                  |                                                                                                                                                                                                                                                   |                                                                                         |                                          |                                                                                                                                                                                                                                                                                                                                                                                                                                                                                                                                                                                                                                                                                                                                             |                                                                                                                                                                                                                                                                                                                                                                                                                                                                                                                                                                                                                                                                                                                                                                                                                                                                                                                                                                                                                                                        |                                                                                                                                                                                                                                                                                                                                                                                                                                                                                                                                                                                                                                                                                                                                                                                                 |                                                                                                                                                                                                                                                                                                                                                                                                                                                                                                                                                                              |                                                                                                                                                                                                                                                                                                                                                                                                                                                                                                                                               |                                                                                                                                                                                                                                                                                                                                                                                                                                                                                                                                                                                                                                                                                                                                                                                                                                                                                                                                                                                                                                                                                                                                                                                                 |                                                                                                                                                                                                                                                                                                                                                                           |                                                                                                                                                                                                                                                                                                                                                                                                                                                                                                                                                                                                                      |                                                                                                                                                                                                                                                                                                                                                                                                                                                                                                                                    |                                                                                                                                                                                                                                                                                                |                                                                                                                                                                                                                                                                                                                                                                                                                                                                                                                                      |                                                                                                                                                                                                                                                                                                                                                           |    |
|                                      | Boatard, E. & Fleming, H. (2013). A study to investigate the walking speed of elderly adults with relation to pedestrian crossings. <i>Physiotherapy Theory and Practice</i> , 29 (2): 142-149.                                                   | Kilkenny, Ireland                                                                       | Mobility impaired and elderly            | Investigate the walking speed of elderly Irish people and to establish if it is within the safe clearance of pedestrian crossings (consideration of the acceleration phase of the subsequent steady state speed).                                                                                                                                                                                                                                                                                                                                                                                                                                                                                                                           | In 2007, 81 pedestrians were killed and 884 were injured on Irish roads. [...] The total casualty rate of pedestrians is highest among both males and females over the age of 75 years (data dating from 2004-2006). "Traffic Management Guidelines" recommended that the green pedestrian aspect time is fixed at 6s and that the amber pedestrian aspect varies with the width of the road, allowing a second for each 1.2m of road width that pedestrian's cross.                                                                                                                                                                                                                                                                                                                                                                                                                                                                                                                                                                                   | n = 52 community-dwelling adults aged 65 years without unreported neurological conditions (recruited from the local community). Average age 75.5 years, 28 with no walking aid, 24 with a walking stick, 2 using 2 walking sticks and 3 using a roller Zimmer frame.                                                                                                                                                                                                                                                                                                                                                                                                                                                                                                                            | 20 pedestrian crossings were identified within a 1km radius of the day care centers of the roller Zimmer frame.                                                                                                                                                                                                                                                                                                                                                                                                                                                              | Time                                                                                                                                                                                                                                                                                                                                                                                                                                                                                                                                          | Mean acceleration in the 2.5m: 0.20 ± 0.15m/s <sup>2</sup> (range 0.0-0.67 m/s-2). Mean steady-state walking speed: 0.82 ± 0.27 m/s (range 0.38-1.41 m/s). 49 participants (94.2%) had a steady state walking speed of less than 1.2 m/s.                                                                                                                                                                                                                                                                                                                                                                                                                                                                                                                                                                                                                                                                                                                                                                                                                                                                                                                                                       | Descriptive analysis: describe data concerning the participants and the characteristics of the pedestrian crossings (mean, standard deviation, minimum, and maximum).                                                                                                                                                                                                     | 1) The sample size and the geographic area were quite small, 2) Participants walked on a level surface, with no obstacles or distractions. 3) Participants were walking at a normal and comfortable walking speed, 2) cannot be determined if they would have been able to clear the pedestrian crossings, given the limitations, at a maximum safe walking speed. 4) An assessment of balance, muscle performance, and strength could contribute to the findings of this kind of study. 5) The results would not be generalizable to the elderly community-dwelling adults as focused on day care center attendees. | The steady-walking speed considered by the "Traffic Management Guidelines" of 1.2m/s is too high for much of the participants. An average steady-walking speed to consider should be around 0.8-0.9 m/s.                                                                                                                                                                                                                                                                                                                           | It is important to take into consideration acceleration in the first 2.5m and the steady-state walking speed in the remaining distance individualized to each pedestrian crossing.                                                                                                             | 45                                                                                                                                                                                                                                                                                                                                                                                                                                                                                                                                   |                                                                                                                                                                                                                                                                                                                                                           |    |
|                                      | Hoxie, R. E. & Rubenstein, L. Z. (1994). Are older pedestrians allowed enough time to cross intersections safely? <i>Journal of the American Geriatrics Society</i> , 42(3), 241-244.                                                             | Los Angeles, California, United States                                                  | Elderly                                  | To characterize and describe the pedestrian traffic flow at a busy urban intersection and to determine the percentage of older pedestrians who are injured because of reduced walking speeds.                                                                                                                                                                                                                                                                                                                                                                                                                                                                                                                                               | To characterize and describe the pedestrian traffic flow at a busy urban intersection and to determine the percentage of older pedestrians who are injured because of reduced walking speeds.                                                                                                                                                                                                                                                                                                                                                                                                                                                                                                                                                                                                                                                                                                                                                                                                                                                          | n = 1220 pedestrians who legally started to cross the intersection by placing one foot in contact with the street while the "walk" display was shown during the 10.5 s of the survey were included in the study. This included 592 (48%) older adults (65 years old) and 637 (52%) younger individuals (<65 years old). 43 of the older pedestrians (7%) used an assistive device.                                                                                                                                                                                                                                                                                                                                                                                                              | Location: Intersection of Third Street and Halifax Avenue (area with a high concentration of older residents and pedestrians, a large number of senior apartments and board and care homes, and several senior citizen centers and shopping centers). The intersection was a T-intersection with the street while the "walk" display was shown during the 10.5 s of the survey were included in the study. This included 592 (48%) older adults (65 years old) and 637 (52%) younger individuals (<65 years old). 43 of the older pedestrians (7%) used an assistive device. | Data were recorded by one observer who was standing on the sidewalk of the intersection. All pedestrians who legally started to cross by placing one foot in contact with the street while the "walk" display was shown were entered into the study. The observer counted and classified all such pedestrians before they entered the intersection by sex, apparent age group, noted whether they used an assistive device, and determined whether they were able to reach the opposite curb before opposing vehicles received a green light. | Percentages of the observations                                                                                                                                                                                                                                                                                                                                                                                                                                                                                                                                                                                                                                                                                                                                                                                                                                                                                                                                                                                                                                                                                                                                                                 | 27% were unable to reach the opposite curb before the light changed to allow cross traffic to enter the intersection. 23% were stranded by a stop all traffic lane away from the safety of the curb when the light turned green on the opposing traffic.                                                                                                                  | The duration of the study was short. Observing a 6.5-hour period for three separate days may not give an adequately representative picture, even though these were the hours of peak traffic by older pedestrians. The observations were limited to one intersection, which may not adequately reflect the situation at other intersections. The definition of age was an observational guess.                                                                                                                                                                                                                       | 27% of older pedestrians were unable to cross in the legally acceptable time. 23% of older pedestrians were stranded by a stop all traffic lane away from the safety of the curb when the light turned green on the opposing traffic. Even though these were the hours of peak traffic by older pedestrians, the observations were limited to one intersection, which may not adequately reflect the situation at other intersections. Timing of the pedestrian signal should be adjusted to allow pedestrians more time to cross. | Many older people in the community seem to have lost some of their ability to walk in an adequate rate to cross the and other intersections in the allotted time.                                                                                                                              | 40                                                                                                                                                                                                                                                                                                                                                                                                                                                                                                                                   |                                                                                                                                                                                                                                                                                                                                                           |    |
|                                      | Schroeder, B. J., Roupahl, N. M., & Hughes, R. G. (2010). Working concept of accessibility: Performance measures for usability of crosswalks by pedestrians with vision impairments. <i>Transportation Research Record</i> , 2140 (2009), 100-110 | Charlotte and Raleigh, North Carolina, United States                                    | Visually impaired                        | To develop measures to describe the decision of the safest moment to cross for blind pedestrians. It is about identifying crossing opportunities in a conflicting traffic stream. It is important to propose metrics that can be used to compare the crossing ability across sites before and after a crossing treatment is installed or even from one pedestrian to another. Hypotheses: both site geometry and conflicting traffic volume contribute to the accessibility of a site but that ultimately driver and pedestrian behavior may play the most crucial role in rendering a site accessible to and usable by pedestrians who are blind.                                                                                          | To develop measures to describe the decision of the safest moment to cross for blind pedestrians. It is about identifying crossing opportunities in a conflicting traffic stream. It is important to propose metrics that can be used to compare the crossing ability across sites before and after a crossing treatment is installed or even from one pedestrian to another. Hypotheses: both site geometry and conflicting traffic volume contribute to the accessibility of a site but that ultimately driver and pedestrian behavior may play the most crucial role in rendering a site accessible to and usable by pedestrians who are blind.                                                                                                                                                                                                                                                                                                                                                                                                     | n = 200, 100 older and 100 younger pedestrians                                                                                                                                                                                                                                                                                                                                                                                                                                                                                                                                                                                                                                                                                                                                                  | Assessment of vehicle operations.                                                                                                                                                                                                                                                                                                                                                                                                                                                                                                                                            | Observed delay = time elapsed from the pedestrian arrival at the crosswalk until the crossing is initiated, 2 seconds. Delay/Min = delay beyond first opportunity, defined as the difference between the observed delay and the delay, assuming the pedestrian had crossed at the first crossing opportunity.                                                                                                                                                                                                                                 | P(Yield) = probability of "Yield" given a yield, defined as the ratio of yields that resulted in a crossing opportunity to "Go" decision. All yields encountered during the observation period.                                                                                                                                                                                                                                                                                                                                                                                                                                                                                                                                                                                                                                                                                                                                                                                                                                                                                                                                                                                                 | There is a higher yielding rate at the PS-RAL roundabout, which may be related to the proximity to a major college campus. Both sites further exhibit a range of yielding percentages. For participants at PS-RAL, the yielding rates varied from 9.4% to 70% (mean 37.2%) with a smaller range evident at DAV-CLT (0% to 33%, mean 11.3%).                               | A lower overall yield utilization rate is evident at DAV-CLT (67.4%) than at PS-RAL (85.4%). Both sites support a slightly higher utilization rate at the exit leg. By combining yielding and the yield utilization rates, it can be stated that the PS-RAL site exhibits a higher likelihood of crossing in a yield than DAV-CLT.                                                                                                                                                                                                                                                                                   | The minimum crossable gaps for DAV-CLT and PS-RAL are approximately 7.0 and 8.0 s respectively. To allow for a direct comparison across sites, the results for PS-RAL are shown for minimum gap thresholds of 6.0 s as well as 7.0 s. DAV-CLT (61.6%) has a slightly higher overall rate of gaps greater than the crossable gap than PS-RAL does (51.8% for the 6-s gap). The differing gap availability is of course greater if the threshold for "crossable" is increased to 7.0 s at PS-RAL.                                    | There are gap utilization rates at DAV-CLT of approximately 60%. At PS-RAL the gap utilization rates are higher for the exit leg with 65.0% and 50.1% utilization rates respectively. When the crossable gap definition is increased to 7.0 s, the utilization rate increases, as expected.    | Although the analysis framework represents a tool to quantify crossing opportunities, it is recognized here that it is not to be used directly by U.S. Access Board or engineering agencies, since it does not take crosswalk usability to specific geometric configurations or factors into account. In other words, crosswalk usability is not defined in terms of metrics that are available to agencies faced with making decisions about roundabout construction or about pedestrian treatments to be installed at roundabouts. | The analysis showed that our site is more usable from a delay perspective, whereas the other is more usable because of safety. It can be argued that pedestrian safety outweighs delay, especially if actual crossings are infrequent. At the same time, there is some limit to how much delay is acceptable even if a crossing is attempted only rarely. | 32 |
|                                      | Duncan-Jones, B. (2001). Modern road crossing designs and visually impaired people. <i>Municipal Engineer</i> , 145 (2), 185.                                                                                                                     |                                                                                         |                                          |                                                                                                                                                                                                                                                                                                                                                                                                                                                                                                                                                                                                                                                                                                                                             |                                                                                                                                                                                                                                                                                                                                                                                                                                                                                                                                                                                                                                                                                                                                                                                                                                                                                                                                                                                                                                                        |                                                                                                                                                                                                                                                                                                                                                                                                                                                                                                                                                                                                                                                                                                                                                                                                 |                                                                                                                                                                                                                                                                                                                                                                                                                                                                                                                                                                              |                                                                                                                                                                                                                                                                                                                                                                                                                                                                                                                                               |                                                                                                                                                                                                                                                                                                                                                                                                                                                                                                                                                                                                                                                                                                                                                                                                                                                                                                                                                                                                                                                                                                                                                                                                 |                                                                                                                                                                                                                                                                                                                                                                           |                                                                                                                                                                                                                                                                                                                                                                                                                                                                                                                                                                                                                      |                                                                                                                                                                                                                                                                                                                                                                                                                                                                                                                                    |                                                                                                                                                                                                                                                                                                |                                                                                                                                                                                                                                                                                                                                                                                                                                                                                                                                      |                                                                                                                                                                                                                                                                                                                                                           |    |
| See also "Descriptive Comprehensive" |                                                                                                                                                                                                                                                   |                                                                                         |                                          |                                                                                                                                                                                                                                                                                                                                                                                                                                                                                                                                                                                                                                                                                                                                             |                                                                                                                                                                                                                                                                                                                                                                                                                                                                                                                                                                                                                                                                                                                                                                                                                                                                                                                                                                                                                                                        |                                                                                                                                                                                                                                                                                                                                                                                                                                                                                                                                                                                                                                                                                                                                                                                                 |                                                                                                                                                                                                                                                                                                                                                                                                                                                                                                                                                                              |                                                                                                                                                                                                                                                                                                                                                                                                                                                                                                                                               |                                                                                                                                                                                                                                                                                                                                                                                                                                                                                                                                                                                                                                                                                                                                                                                                                                                                                                                                                                                                                                                                                                                                                                                                 |                                                                                                                                                                                                                                                                                                                                                                           |                                                                                                                                                                                                                                                                                                                                                                                                                                                                                                                                                                                                                      |                                                                                                                                                                                                                                                                                                                                                                                                                                                                                                                                    |                                                                                                                                                                                                                                                                                                |                                                                                                                                                                                                                                                                                                                                                                                                                                                                                                                                      |                                                                                                                                                                                                                                                                                                                                                           |    |

[illegible]
