# Supplementary material
Source: publisher figshare collection journal article supplement (https://tandf.figshare.com/articles/dataset/_/5982280)
Supplement: Supplementary file 7 [file 1]

| TYPE OF INFRASTRUCTURES | REFERENCE                                                                                                                                                                                        | ORIGIN/CITY                    | TARGETED INDIVIDUALS                                      | AIM / OBJECTIVES / HYPOTHESES                                                                                                                                                                                                                                                                                                                                                                                                                                                                                         | JUSTIFICATION                                                                                                                                                                                                                                                                                                                                                          | PARTICIPANTS                                                                                                                                                                                                                                                                                                                                                                               | METHODOLOGY / SET UP                                                                                                                                                                                                                                                                                                                                                                         | RESEARCH TOOLS                                                                                               | VARIABLES / INDICATORS STUDIED                                                                                                                                                                                                                                                       | ANALYSIS / INTERPRETATION                                                                                                                                                                                                                                                                                                                                                                                                                                                                                                                                            | RESULTS                                                                                                                                                                                                                                                                                                                                                                                                                                                                                                                                                                                                                                                          | STATED LIMITS                                                                                                                                    | CONCLUSION (THE BEST INFRASTRUCTURE/PRACTICE)                                                                                                                                                                                                                                                                                                                                                                                                                                                        | QUALITY |  |
|-------------------------|--------------------------------------------------------------------------------------------------------------------------------------------------------------------------------------------------|--------------------------------|-----------------------------------------------------------|-----------------------------------------------------------------------------------------------------------------------------------------------------------------------------------------------------------------------------------------------------------------------------------------------------------------------------------------------------------------------------------------------------------------------------------------------------------------------------------------------------------------------|------------------------------------------------------------------------------------------------------------------------------------------------------------------------------------------------------------------------------------------------------------------------------------------------------------------------------------------------------------------------|--------------------------------------------------------------------------------------------------------------------------------------------------------------------------------------------------------------------------------------------------------------------------------------------------------------------------------------------------------------------------------------------|----------------------------------------------------------------------------------------------------------------------------------------------------------------------------------------------------------------------------------------------------------------------------------------------------------------------------------------------------------------------------------------------|--------------------------------------------------------------------------------------------------------------|--------------------------------------------------------------------------------------------------------------------------------------------------------------------------------------------------------------------------------------------------------------------------------------|----------------------------------------------------------------------------------------------------------------------------------------------------------------------------------------------------------------------------------------------------------------------------------------------------------------------------------------------------------------------------------------------------------------------------------------------------------------------------------------------------------------------------------------------------------------------|------------------------------------------------------------------------------------------------------------------------------------------------------------------------------------------------------------------------------------------------------------------------------------------------------------------------------------------------------------------------------------------------------------------------------------------------------------------------------------------------------------------------------------------------------------------------------------------------------------------------------------------------------------------|--------------------------------------------------------------------------------------------------------------------------------------------------|------------------------------------------------------------------------------------------------------------------------------------------------------------------------------------------------------------------------------------------------------------------------------------------------------------------------------------------------------------------------------------------------------------------------------------------------------------------------------------------------------|---------|--|
| Ramp and steps          | Bochsler, T. M., Legge, G.E., Gage, R., & Kallie, G.S. (2013). Recognition of ramps and steps by people with low vision. <i>Investigative Ophthalmology and Visual Science</i> , 54 (1) 288-294. | Minneapolis, MN, United States | Visually impaired                                         | Assess the impact of viewing conditions and environmental factors on the recognition of ramps and steps by people with low vision and determine if results from previous studies of normally sighted subjects, wearing acuity-reducing goggles, would generalize to low vision.                                                                                                                                                                                                                                       | As of 2004, there were about 3.3 million Americans over the age of 40 years with impaired vision, with the number expected to increase to 5.7 million by 2020. Visual impairment is a risk factor for both falls and fractures in the elderly. Obstacles on the ground or discontinuities in the ground plane, such as steps, pose hazards for people with low vision. | n = 16 (mean age 49) with heterogeneous forms of low vision (from moderate to severe, being 20/200 to 20/2000) (for experiment #3 n = 13). <b>Exclusion criteria:</b> being 86 years old (participants are asked to climb a 16-inch step). <b>Comparison group:</b> n = 48 normally sighted individuals (mean age of 22), wearing blurring goggles (effective acuity to 20/135 or 20/900). | <b>Experimental design:</b> 3 experiments: 1) Large, windowless, 33.25 x 16.58m basement classroom was used. A uniform gray sidewalk (1.3 x7.5m) was built. <b>5 possible targets:</b> single step up or down (7-inch high), ramp up or down (7-inch change of height over 8ft), and flat surface. <b>Target:</b> A 4x8ft, 2-inch-thick regular panel of expanded polystyrene, painted gray. | Acuity, Target recognition, Distance                                                                         | Lighting, Target recognition                                                                                                                                                                                                                                                         | Descriptive analysis (percentage of correct responses), confusion matrices, ANOVAs and t-tests to compare experimental groups                                                                                                                                                                                                                                                                                                                                                                                                                                        | Low-vision performance tended to decrease with lower acuity. Significant main effects of viewing distance and target type. Low-vision and comparison groups performed better at the shorter distances (2 and 10ft), but both did not show significant differences in performance between 5 and 10ft. A step up was more recognizable than a step down for both groups (perhaps because of the high contrast between the top of the step and the floor). The most important recognition biases happened when the subject viewed the ramp down target and confused it with a flat surface or when he viewed the ramp up target and confused it for a flat surface. | The study is not representative of the population since it excluded elderly people, a target group that commonly experiences vision impairments. | Locomotion and viewing distance strongly influence performance, while background contrast and lighting arrangement have weaker effects. Since ramps are less recognizable, it is important to provide additional visual and tactile cues to support their recognition.                                                                                                                                                                                                                               | 43      |  |
|                         |                                                                                                                                                                                                  |                                |                                                           |                                                                                                                                                                                                                                                                                                                                                                                                                                                                                                                       |                                                                                                                                                                                                                                                                                                                                                                        |                                                                                                                                                                                                                                                                                                                                                                                            | <b>#1 Targetbackground contrast and viewing distance:</b> subjects viewed the gray targets against a gray (contrast = 0.25) or black (contrast = 0.82) background with standard overhead room lighting on 3 distances (5, 10, and 20 ft). 4 trials were performed.                                                                                                                           |                                                                                                              |                                                                                                                                                                                                                                                                                      |                                                                                                                                                                                                                                                                                                                                                                                                                                                                                                                                                                      |                                                                                                                                                                                                                                                                                                                                                                                                                                                                                                                                                                                                                                                                  |                                                                                                                                                  |                                                                                                                                                                                                                                                                                                                                                                                                                                                                                                      |         |  |
|                         |                                                                                                                                                                                                  |                                |                                                           |                                                                                                                                                                                                                                                                                                                                                                                                                                                                                                                       |                                                                                                                                                                                                                                                                                                                                                                        |                                                                                                                                                                                                                                                                                                                                                                                            | <b>#2 Lighting arrangement:</b> 2 different lighting arrangements: a light box simulated a window to the rear left or left; 40 trials (2 windows x 5 targets x 4 trials/target) at a distance of 10ft were performed.                                                                                                                                                                        |                                                                                                              |                                                                                                                                                                                                                                                                                      |                                                                                                                                                                                                                                                                                                                                                                                                                                                                                                                                                                      |                                                                                                                                                                                                                                                                                                                                                                                                                                                                                                                                                                                                                                                                  |                                                                                                                                                  |                                                                                                                                                                                                                                                                                                                                                                                                                                                                                                      |         |  |
|                         |                                                                                                                                                                                                  |                                |                                                           |                                                                                                                                                                                                                                                                                                                                                                                                                                                                                                                       |                                                                                                                                                                                                                                                                                                                                                                        |                                                                                                                                                                                                                                                                                                                                                                                            | <b>#3 Locomotion:</b> comparison of stationary (recognition distance 10ft from target) and walking (starting at 20ft) conditions for recognition performance.                                                                                                                                                                                                                                | Walking or stationary condition, Target recognition                                                          |                                                                                                                                                                                                                                                                                      |                                                                                                                                                                                                                                                                                                                                                                                                                                                                                                                                                                      |                                                                                                                                                                                                                                                                                                                                                                                                                                                                                                                                                                                                                                                                  |                                                                                                                                                  |                                                                                                                                                                                                                                                                                                                                                                                                                                                                                                      |         |  |
|                         | Canale, I., Felici, F., Marchetti, M., & Ricci, B. (1991). Ramp length/grade prescriptions for wheelchair-dependent individuals. <i>Paraplegia</i> , 29, 479-485.                                | Lazio, Italy                   | Mobility impaired, wheelchair-dependent individuals (WDI) | Identify the most propitious relationship length/grade to be adopted in ramp construction for wheelchair-dependent individuals. 1) Measurement of maximal voluntary isometric contraction (MVC). 2) Correlation of MVC with significant parameters such as age, sex, or subjects, etc. 3) Verification of prescriptions using a specified length/grade test ramp to be traversed by a consistent number of WDI.                                                                                                       | The quality of life of WDI is dependent upon a number of factors. One of the most frequent difficulty is represented by gradients, thus the necessity to provide WDI with facilities that can help them in managing such architectural barriers.                                                                                                                       | n = 140 (86 males, 54 females). <b>Exclusion criteria:</b> subjects unable to attain the minimum force application levels in 21 of the 3 basic, pre-selected, wheel rim positions.                                                                                                                                                                                                         | <b>Experimental design with mixed methods:</b> Questionnaire and MVC were measured. <b>Set up:</b> 2 ramps of 3 and 6m length and 12 and 10% incline respectively had been assembled in the gymnasium of Santa Lucia Center.                                                                                                                                                                 | Questionnaire: information related to self-sufficiency outside home (SSOH) and active sport experience (ASE) | A mathematical simulation of kinetics and kinematics of WDI ramp ascent was incorporated into a computer program to illustrate the relationship between ramp-length transversability and individual maximal voluntary isometric contraction (MVC) exerted by WDI on both wheel rims. | -80% of the subjects were able to climb ramps of 8% grade for a 3m length and 7% grade for a 6m length. 80% of the subjects who were active in sports were able to ascend ramp inclines of 15%, slightly more than double the achievement of the 80% of subjects. There are negligible differences in force obtained by WDI with different placement of the hands on the wheel hand-rim. Not all the WDI who attempted to traverse, and subsequently successfully completed the task, pertained to the ASE group, although they pertained to the SSOH group as well. |                                                                                                                                                                                                                                                                                                                                                                                                                                                                                                                                                                                                                                                                  |                                                                                                                                                  | Ramp length/grade relationships: 1) When we have no reasons to force the incline of a ramp, a wise solution would be represented by an 8% incline. This incline, which poses no practical limitations in terms of ramp length, can be easily traversed by the majority of WDI population. 2) When we are faced with public buildings that can not be easily altered in their structure, a maximum ramp length of 15% for a ramp length of 1 m, 12% for 3m and 10% for 6m ramp length can be allowed. |         |  |
|                         | Cappozzo, A., Felici, F., Figura, F., Marchetti, M., & Ricci, B. (1991). Prediction of ramp traversability for wheelchair-dependent individuals. <i>Paraplegia</i> , 29, 470-478.                | Lazio, Italy                   | Mobility impaired, wheelchair-dependent individuals (WDI) | Obtain a single, objective criterion, based on easily-obtainable and reliable measurements, which permits the prediction of allowable limits of length and grade for ramps that can be adopted for any special categories of wheelchair-dependent individuals (WDI). <b>Hypothesis:</b> the maximum voluntary force (MVC) that a subject can exert in pushing a wheel rim is the most important determinant of the limits of possible ascent. MVC can be assumed to be a sufficient predictor of WDI ascent capacity. | Ramps are commonly used to provide opportunities for WDI to overcome differences between grade levels. Yet, the limits of allowable grades have not been based upon stated scientific criteria. This is reflected in widely differing standards among various countries.                                                                                               | n = 12 WDI who all had become paraplegic as a consequence of traumatic events. (5 were selected as being representative of different levels of spinal lesions for kinetic and kinematic measurements)                                                                                                                                                                                      | <b>Experimental design. Set up:</b> Adjustable grade ramp (6-m long and 1.50 m wide).                                                                                                                                                                                                                                                                                                        | Accelerometer (placed horizontally on the midpoint of the wheelchair axle)                                   | CG kinematics. Maximum voluntary force (MVC) and velocity                                                                                                                                                                                                                            | Kinematics measurements. Displacement                                                                                                                                                                                                                                                                                                                                                                                                                                                                                                                                | Quite the same modality of pushing was observed in each of the 6 male subjects tested. Irrespective of ramp grade, each subject consistently used the same amount of force which varied between 75 and 85% of MVC. When grade was augmented, the mean speed of progression and the time interval between pushings decreased.                                                                                                                                                                                                                                                                                                                                     |                                                                                                                                                  |                                                                                                                                                                                                                                                                                                                                                                                                                                                                                                      |         |  |
|                         |                                                                                                                                                                                                  |                                |                                                           |                                                                                                                                                                                                                                                                                                                                                                                                                                                                                                                       |                                                                                                                                                                                                                                                                                                                                                                        |                                                                                                                                                                                                                                                                                                                                                                                            |                                                                                                                                                                                                                                                                                                                                                                                              |                                                                                                              |                                                                                                                                                                                                                                                                                      |                                                                                                                                                                                                                                                                                                                                                                                                                                                                                                                                                                      |                                                                                                                                                                                                                                                                                                                                                                                                                                                                                                                                                                                                                                                                  |                                                                                                                                                  |                                                                                                                                                                                                                                                                                                                                                                                                                                                                                                      |         |  |
|                         |                                                                                                                                                                                                  |                                |                                                           |                                                                                                                                                                                                                                                                                                                                                                                                                                                                                                                       |                                                                                                                                                                                                                                                                                                                                                                        |                                                                                                                                                                                                                                                                                                                                                                                            |                                                                                                                                                                                                                                                                                                                                                                                              |                                                                                                              |                                                                                                                                                                                                                                                                                      |                                                                                                                                                                                                                                                                                                                                                                                                                                                                                                                                                                      |                                                                                                                                                                                                                                                                                                                                                                                                                                                                                                                                                                                                                                                                  |                                                                                                                                                  |                                                                                                                                                                                                                                                                                                                                                                                                                                                                                                      |         |  |
|                         |                                                                                                                                                                                                  |                                |                                                           |                                                                                                                                                                                                                                                                                                                                                                                                                                                                                                                       |                                                                                                                                                                                                                                                                                                                                                                        |                                                                                                                                                                                                                                                                                                                                                                                            |                                                                                                                                                                                                                                                                                                                                                                                              |                                                                                                              |                                                                                                                                                                                                                                                                                      |                                                                                                                                                                                                                                                                                                                                                                                                                                                                                                                                                                      |                                                                                                                                                                                                                                                                                                                                                                                                                                                                                                                                                                                                                                                                  |                                                                                                                                                  |                                                                                                                                                                                                                                                                                                                                                                                                                                                                                                      |         |  |
|                         |                                                                                                                                                                                                  |                                |                                                           |                                                                                                                                                                                                                                                                                                                                                                                                                                                                                                                       |                                                                                                                                                                                                                                                                                                                                                                        |                                                                                                                                                                                                                                                                                                                                                                                            |                                                                                                                                                                                                                                                                                                                                                                                              |                                                                                                              |                                                                                                                                                                                                                                                                                      |                                                                                                                                                                                                                                                                                                                                                                                                                                                                                                                                                                      |                                                                                                                                                                                                                                                                                                                                                                                                                                                                                                                                                                                                                                                                  |                                                                                                                                                  |                                                                                                                                                                                                                                                                                                                                                                                                                                                                                                      |         |  |
|                         |                                                                                                                                                                                                  |                                |                                                           |                                                                                                                                                                                                                                                                                                                                                                                                                                                                                                                       |                                                                                                                                                                                                                                                                                                                                                                        |                                                                                                                                                                                                                                                                                                                                                                                            |                                                                                                                                                                                                                                                                                                                                                                                              |                                                                                                              |                                                                                                                                                                                                                                                                                      |                                                                                                                                                                                                                                                                                                                                                                                                                                                                                                                                                                      |                                                                                                                                                                                                                                                                                                                                                                                                                                                                                                                                                                                                                                                                  |                                                                                                                                                  |                                                                                                                                                                                                                                                                                                                                                                                                                                                                                                      |         |  |
|                         |                                                                                                                                                                                                  |                                |                                                           |                                                                                                                                                                                                                                                                                                                                                                                                                                                                                                                       |                                                                                                                                                                                                                                                                                                                                                                        |                                                                                                                                                                                                                                                                                                                                                                                            |                                                                                                                                                                                                                                                                                                                                                                                              |                                                                                                              |                                                                                                                                                                                                                                                                                      |                                                                                                                                                                                                                                                                                                                                                                                                                                                                                                                                                                      |                                                                                                                                                                                                                                                                                                                                                                                                                                                                                                                                                                                                                                                                  |                                                                                                                                                  |                                                                                                                                                                                                                                                                                                                                                                                                                                                                                                      |         |  |
|                         |                                                                                                                                                                                                  |                                |                                                           |                                                                                                                                                                                                                                                                                                                                                                                                                                                                                                                       |                                                                                                                                                                                                                                                                                                                                                                        |                                                                                                                                                                                                                                                                                                                                                                                            |                                                                                                                                                                                                                                                                                                                                                                                              |                                                                                                              |                                                                                                                                                                                                                                                                                      |                                                                                                                                                                                                                                                                                                                                                                                                                                                                                                                                                                      |                                                                                                                                                                                                                                                                                                                                                                                                                                                                                                                                                                                                                                                                  |                                                                                                                                                  |                                                                                                                                                                                                                                                                                                                                                                                                                                                                                                      |         |  |
|                         |                                                                                                                                                                                                  |                                |                                                           |                                                                                                                                                                                                                                                                                                                                                                                                                                                                                                                       |                                                                                                                                                                                                                                                                                                                                                                        |                                                                                                                                                                                                                                                                                                                                                                                            |                                                                                                                                                                                                                                                                                                                                                                                              |                                                                                                              |                                                                                                                                                                                                                                                                                      |                                                                                                                                                                                                                                                                                                                                                                                                                                                                                                                                                                      |                                                                                                                                                                                                                                                                                                                                                                                                                                                                                                                                                                                                                                                                  |                                                                                                                                                  |                                                                                                                                                                                                                                                                                                                                                                                                                                                                                                      |         |  |
|                         |                                                                                                                                                                                                  |                                |                                                           |                                                                                                                                                                                                                                                                                                                                                                                                                                                                                                                       |                                                                                                                                                                                                                                                                                                                                                                        |                                                                                                                                                                                                                                                                                                                                                                                            |                                                                                                                                                                                                                                                                                                                                                                                              |                                                                                                              |                                                                                                                                                                                                                                                                                      |                                                                                                                                                                                                                                                                                                                                                                                                                                                                                                                                                                      |                                                                                                                                                                                                                                                                                                                                                                                                                                                                                                                                                                                                                                                                  |                                                                                                                                                  |                                                                                                                                                                                                                                                                                                                                                                                                                                                                                                      |         |  |
|                         |                                                                                                                                                                                                  |                                |                                                           |                                                                                                                                                                                                                                                                                                                                                                                                                                                                                                                       |                                                                                                                                                                                                                                                                                                                                                                        |                                                                                                                                                                                                                                                                                                                                                                                            |                                                                                                                                                                                                                                                                                                                                                                                              |                                                                                                              |                                                                                                                                                                                                                                                                                      |                                                                                                                                                                                                                                                                                                                                                                                                                                                                                                                                                                      |                                                                                                                                                                                                                                                                                                                                                                                                                                                                                                                                                                                                                                                                  |                                                                                                                                                  |                                                                                                                                                                                                                                                                                                                                                                                                                                                                                                      |         |  |
|                         |                                                                                                                                                                                                  |                                |                                                           |                                                                                                                                                                                                                                                                                                                                                                                                                                                                                                                       |                                                                                                                                                                                                                                                                                                                                                                        |                                                                                                                                                                                                                                                                                                                                                                                            |                                                                                                                                                                                                                                                                                                                                                                                              |                                                                                                              |                                                                                                                                                                                                                                                                                      |                                                                                                                                                                                                                                                                                                                                                                                                                                                                                                                                                                      |                                                                                                                                                                                                                                                                                                                                                                                                                                                                                                                                                                                                                                                                  |                                                                                                                                                  |                                                                                                                                                                                                                                                                                                                                                                                                                                                                                                      |         |  |
|                         |                                                                                                                                                                                                  |                                |                                                           |                                                                                                                                                                                                                                                                                                                                                                                                                                                                                                                       |                                                                                                                                                                                                                                                                                                                                                                        |                                                                                                                                                                                                                                                                                                                                                                                            |                                                                                                                                                                                                                                                                                                                                                                                              |                                                                                                              |                                                                                                                                                                                                                                                                                      |                                                                                                                                                                                                                                                                                                                                                                                                                                                                                                                                                                      |                                                                                                                                                                                                                                                                                                                                                                                                                                                                                                                                                                                                                                                                  |                                                                                                                                                  |                                                                                                                                                                                                                                                                                                                                                                                                                                                                                                      |         |  |
|                         |                                                                                                                                                                                                  |                                |                                                           |                                                                                                                                                                                                                                                                                                                                                                                                                                                                                                                       |                                                                                                                                                                                                                                                                                                                                                                        |                                                                                                                                                                                                                                                                                                                                                                                            |                                                                                                                                                                                                                                                                                                                                                                                              |                                                                                                              |                                                                                                                                                                                                                                                                                      |                                                                                                                                                                                                                                                                                                                                                                                                                                                                                                                                                                      |                                                                                                                                                                                                                                                                                                                                                                                                                                                                                                                                                                                                                                                                  |                                                                                                                                                  |                                                                                                                                                                                                                                                                                                                                                                                                                                                                                                      |         |  |
|                         |                                                                                                                                                                                                  |                                |                                                           |                                                                                                                                                                                                                                                                                                                                                                                                                                                                                                                       |                                                                                                                                                                                                                                                                                                                                                                        |                                                                                                                                                                                                                                                                                                                                                                                            |                                                                                                                                                                                                                                                                                                                                                                                              |                                                                                                              |                                                                                                                                                                                                                                                                                      |                                                                                                                                                                                                                                                                                                                                                                                                                                                                                                                                                                      |                                                                                                                                                                                                                                                                                                                                                                                                                                                                                                                                                                                                                                                                  |                                                                                                                                                  |                                                                                                                                                                                                                                                                                                                                                                                                                                                                                                      |         |  |
|                         |                                                                                                                                                                                                  |                                |                                                           |                                                                                                                                                                                                                                                                                                                                                                                                                                                                                                                       |                                                                                                                                                                                                                                                                                                                                                                        |                                                                                                                                                                                                                                                                                                                                                                                            |                                                                                                                                                                                                                                                                                                                                                                                              |                                                                                                              |                                                                                                                                                                                                                                                                                      |                                                                                                                                                                                                                                                                                                                                                                                                                                                                                                                                                                      |                                                                                                                                                                                                                                                                                                                                                                                                                                                                                                                                                                                                                                                                  |                                                                                                                                                  |                                                                                                                                                                                                                                                                                                                                                                                                                                                                                                      |         |  |
|                         |                                                                                                                                                                                                  |                                |                                                           |                                                                                                                                                                                                                                                                                                                                                                                                                                                                                                                       |                                                                                                                                                                                                                                                                                                                                                                        |                                                                                                                                                                                                                                                                                                                                                                                            |                                                                                                                                                                                                                                                                                                                                                                                              |                                                                                                              |                                                                                                                                                                                                                                                                                      |                                                                                                                                                                                                                                                                                                                                                                                                                                                                                                                                                                      |                                                                                                                                                                                                                                                                                                                                                                                                                                                                                                                                                                                                                                                                  |                                                                                                                                                  |                                                                                                                                                                                                                                                                                                                                                                                                                                                                                                      |         |  |
|                         |                                                                                                                                                                                                  |                                |                                                           |                                                                                                                                                                                                                                                                                                                                                                                                                                                                                                                       |                                                                                                                                                                                                                                                                                                                                                                        |                                                                                                                                                                                                                                                                                                                                                                                            |                                                                                                                                                                                                                                                                                                                                                                                              |                                                                                                              |                                                                                                                                                                                                                                                                                      |                                                                                                                                                                                                                                                                                                                                                                                                                                                                                                                                                                      |                                                                                                                                                                                                                                                                                                                                                                                                                                                                                                                                                                                                                                                                  |                                                                                                                                                  |                                                                                                                                                                                                                                                                                                                                                                                                                                                                                                      |         |  |
|                         |                                                                                                                                                                                                  |                                |                                                           |                                                                                                                                                                                                                                                                                                                                                                                                                                                                                                                       |                                                                                                                                                                                                                                                                                                                                                                        |                                                                                                                                                                                                                                                                                                                                                                                            |                                                                                                                                                                                                                                                                                                                                                                                              |                                                                                                              |                                                                                                                                                                                                                                                                                      |                                                                                                                                                                                                                                                                                                                                                                                                                                                                                                                                                                      |                                                                                                                                                                                                                                                                                                                                                                                                                                                                                                                                                                                                                                                                  |                                                                                                                                                  |                                                                                                                                                                                                                                                                                                                                                                                                                                                                                                      |         |  |
|                         |                                                                                                                                                                                                  |                                |                                                           |                                                                                                                                                                                                                                                                                                                                                                                                                                                                                                                       |                                                                                                                                                                                                                                                                                                                                                                        |                                                                                                                                                                                                                                                                                                                                                                                            |                                                                                                                                                                                                                                                                                                                                                                                              |                                                                                                              |                                                                                                                                                                                                                                                                                      |                                                                                                                                                                                                                                                                                                                                                                                                                                                                                                                                                                      |                                                                                                                                                                                                                                                                                                                                                                                                                                                                                                                                                                                                                                                                  |                                                                                                                                                  |                                                                                                                                                                                                                                                                                                                                                                                                                                                                                                      |         |  |
|                         |                                                                                                                                                                                                  |                                |                                                           |                                                                                                                                                                                                                                                                                                                                                                                                                                                                                                                       |                                                                                                                                                                                                                                                                                                                                                                        |                                                                                                                                                                                                                                                                                                                                                                                            |                                                                                                                                                                                                                                                                                                                                                                                              |                                                                                                              |                                                                                                                                                                                                                                                                                      |                                                                                                                                                                                                                                                                                                                                                                                                                                                                                                                                                                      |                                                                                                                                                                                                                                                                                                                                                                                                                                                                                                                                                                                                                                                                  |                                                                                                                                                  |                                                                                                                                                                                                                                                                                                                                                                                                                                                                                                      |         |  |
|                         |                                                                                                                                                                                                  |                                |                                                           |                                                                                                                                                                                                                                                                                                                                                                                                                                                                                                                       |                                                                                                                                                                                                                                                                                                                                                                        |                                                                                                                                                                                                                                                                                                                                                                                            |                                                                                                                                                                                                                                                                                                                                                                                              |                                                                                                              |                                                                                                                                                                                                                                                                                      |                                                                                                                                                                                                                                                                                                                                                                                                                                                                                                                                                                      |                                                                                                                                                                                                                                                                                                                                                                                                                                                                                                                                                                                                                                                                  |                                                                                                                                                  |                                                                                                                                                                                                                                                                                                                                                                                                                                                                                                      |         |  |
|                         |                                                                                                                                                                                                  |                                |                                                           |                                                                                                                                                                                                                                                                                                                                                                                                                                                                                                                       |                                                                                                                                                                                                                                                                                                                                                                        |                                                                                                                                                                                                                                                                                                                                                                                            |                                                                                                                                                                                                                                                                                                                                                                                              |                                                                                                              |                                                                                                                                                                                                                                                                                      |                                                                                                                                                                                                                                                                                                                                                                                                                                                                                                                                                                      |                                                                                                                                                                                                                                                                                                                                                                                                                                                                                                                                                                                                                                                                  |                                                                                                                                                  |                                                                                                                                                                                                                                                                                                                                                                                                                                                                                                      |         |  |
|                         |                                                                                                                                                                                                  |                                |                                                           |                                                                                                                                                                                                                                                                                                                                                                                                                                                                                                                       |                                                                                                                                                                                                                                                                                                                                                                        |                                                                                                                                                                                                                                                                                                                                                                                            |                                                                                                                                                                                                                                                                                                                                                                                              |                                                                                                              |                                                                                                                                                                                                                                                                                      |                                                                                                                                                                                                                                                                                                                                                                                                                                                                                                                                                                      |                                                                                                                                                                                                                                                                                                                                                                                                                                                                                                                                                                                                                                                                  |                                                                                                                                                  |                                                                                                                                                                                                                                                                                                                                                                                                                                                                                                      |         |  |
|                         |                                                                                                                                                                                                  |                                |                                                           |                                                                                                                                                                                                                                                                                                                                                                                                                                                                                                                       |                                                                                                                                                                                                                                                                                                                                                                        |                                                                                                                                                                                                                                                                                                                                                                                            |                                                                                                                                                                                                                                                                                                                                                                                              |                                                                                                              |                                                                                                                                                                                                                                                                                      |                                                                                                                                                                                                                                                                                                                                                                                                                                                                                                                                                                      |                                                                                                                                                                                                                                                                                                                                                                                                                                                                                                                                                                                                                                                                  |                                                                                                                                                  |                                                                                                                                                                                                                                                                                                                                                                                                                                                                                                      |         |  |
|                         |                                                                                                                                                                                                  |                                |                                                           |                                                                                                                                                                                                                                                                                                                                                                                                                                                                                                                       |                                                                                                                                                                                                                                                                                                                                                                        |                                                                                                                                                                                                                                                                                                                                                                                            |                                                                                                                                                                                                                                                                                                                                                                                              |                                                                                                              |                                                                                                                                                                                                                                                                                      |                                                                                                                                                                                                                                                                                                                                                                                                                                                                                                                                                                      |                                                                                                                                                                                                                                                                                                                                                                                                                                                                                                                                                                                                                                                                  |                                                                                                                                                  |                                                                                                                                                                                                                                                                                                                                                                                                                                                                                                      |         |  |
|                         |                                                                                                                                                                                                  |                                |                                                           |                                                                                                                                                                                                                                                                                                                                                                                                                                                                                                                       |                                                                                                                                                                                                                                                                                                                                                                        |                                                                                                                                                                                                                                                                                                                                                                                            |                                                                                                                                                                                                                                                                                                                                                                                              |                                                                                                              |                                                                                                                                                                                                                                                                                      |                                                                                                                                                                                                                                                                                                                                                                                                                                                                                                                                                                      |                                                                                                                                                                                                                                                                                                                                                                                                                                                                                                                                                                                                                                                                  |                                                                                                                                                  |                                                                                                                                                                                                                                                                                                                                                                                                                                                                                                      |         |  |
|                         |                                                                                                                                                                                                  |                                |                                                           |                                                                                                                                                                                                                                                                                                                                                                                                                                                                                                                       |                                                                                                                                                                                                                                                                                                                                                                        |                                                                                                                                                                                                                                                                                                                                                                                            |                                                                                                                                                                                                                                                                                                                                                                                              |                                                                                                              |                                                                                                                                                                                                                                                                                      |                                                                                                                                                                                                                                                                                                                                                                                                                                                                                                                                                                      |                                                                                                                                                                                                                                                                                                                                                                                                                                                                                                                                                                                                                                                                  |                                                                                                                                                  |                                                                                                                                                                                                                                                                                                                                                                                                                                                                                                      |         |  |
|                         |                                                                                                                                                                                                  |                                |                                                           |                                                                                                                                                                                                                                                                                                                                                                                                                                                                                                                       |                                                                                                                                                                                                                                                                                                                                                                        |                                                                                                                                                                                                                                                                                                                                                                                            |                                                                                                                                                                                                                                                                                                                                                                                              |                                                                                                              |                                                                                                                                                                                                                                                                                      |                                                                                                                                                                                                                                                                                                                                                                                                                                                                                                                                                                      |                                                                                                                                                                                                                                                                                                                                                                                                                                                                                                                                                                                                                                                                  |                                                                                                                                                  |                                                                                                                                                                                                                                                                                                                                                                                                                                                                                                      |         |  |
|                         |                                                                                                                                                                                                  |                                |                                                           |                                                                                                                                                                                                                                                                                                                                                                                                                                                                                                                       |                                                                                                                                                                                                                                                                                                                                                                        |                                                                                                                                                                                                                                                                                                                                                                                            |                                                                                                                                                                                                                                                                                                                                                                                              |                                                                                                              |                                                                                                                                                                                                                                                                                      |                                                                                                                                                                                                                                                                                                                                                                                                                                                                                                                                                                      |                                                                                                                                                                                                                                                                                                                                                                                                                                                                                                                                                                                                                                                                  |                                                                                                                                                  |                                                                                                                                                                                                                                                                                                                                                                                                                                                                                                      |         |  |
|                         |                                                                                                                                                                                                  |                                |                                                           |                                                                                                                                                                                                                                                                                                                                                                                                                                                                                                                       |                                                                                                                                                                                                                                                                                                                                                                        |                                                                                                                                                                                                                                                                                                                                                                                            |                                                                                                                                                                                                                                                                                                                                                                                              |                                                                                                              |                                                                                                                                                                                                                                                                                      |                                                                                                                                                                                                                                                                                                                                                                                                                                                                                                                                                                      |                                                                                                                                                                                                                                                                                                                                                                                                                                                                                                                                                                                                                                                                  |                                                                                                                                                  |                                                                                                                                                                                                                                                                                                                                                                                                                                                                                                      |         |  |
|                         |                                                                                                                                                                                                  |                                |                                                           |                                                                                                                                                                                                                                                                                                                                                                                                                                                                                                                       |                                                                                                                                                                                                                                                                                                                                                                        |                                                                                                                                                                                                                                                                                                                                                                                            |                                                                                                                                                                                                                                                                                                                                                                                              |                                                                                                              |                                                                                                                                                                                                                                                                                      |                                                                                                                                                                                                                                                                                                                                                                                                                                                                                                                                                                      |                                                                                                                                                                                                                                                                                                                                                                                                                                                                                                                                                                                                                                                                  |                                                                                                                                                  |                                                                                                                                                                                                                                                                                                                                                                                                                                                                                                      |         |  |
|                         |                                                                                                                                                                                                  |                                |                                                           |                                                                                                                                                                                                                                                                                                                                                                                                                                                                                                                       |                                                                                                                                                                                                                                                                                                                                                                        |                                                                                                                                                                                                                                                                                                                                                                                            |                                                                                                                                                                                                                                                                                                                                                                                              |                                                                                                              |                                                                                                                                                                                                                                                                                      |                                                                                                                                                                                                                                                                                                                                                                                                                                                                                                                                                                      |                                                                                                                                                                                                                                                                                                                                                                                                                                                                                                                                                                                                                                                                  |                                                                                                                                                  |                                                                                                                                                                                                                                                                                                                                                                                                                                                                                                      |         |  |
|                         |                                                                                                                                                                                                  |                                |                                                           |                                                                                                                                                                                                                                                                                                                                                                                                                                                                                                                       |                                                                                                                                                                                                                                                                                                                                                                        |                                                                                                                                                                                                                                                                                                                                                                                            |                                                                                                                                                                                                                                                                                                                                                                                              |                                                                                                              |                                                                                                                                                                                                                                                                                      |                                                                                                                                                                                                                                                                                                                                                                                                                                                                                                                                                                      |                                                                                                                                                                                                                                                                                                                                                                                                                                                                                                                                                                                                                                                                  |                                                                                                                                                  |                                                                                                                                                                                                                                                                                                                                                                                                                                                                                                      |         |  |
|                         |                                                                                                                                                                                                  |                                |                                                           |                                                                                                                                                                                                                                                                                                                                                                                                                                                                                                                       |                                                                                                                                                                                                                                                                                                                                                                        |                                                                                                                                                                                                                                                                                                                                                                                            |                                                                                                                                                                                                                                                                                                                                                                                              |                                                                                                              |                                                                                                                                                                                                                                                                                      |                                                                                                                                                                                                                                                                                                                                                                                                                                                                                                                                                                      |                                                                                                                                                                                                                                                                                                                                                                                                                                                                                                                                                                                                                                                                  |                                                                                                                                                  |                                                                                                                                                                                                                                                                                                                                                                                                                                                                                                      |         |  |
|                         |                                                                                                                                                                                                  |                                |                                                           |                                                                                                                                                                                                                                                                                                                                                                                                                                                                                                                       |                                                                                                                                                                                                                                                                                                                                                                        |                                                                                                                                                                                                                                                                                                                                                                                            |                                                                                                                                                                                                                                                                                                                                                                                              |                                                                                                              |                                                                                                                                                                                                                                                                                      |                                                                                                                                                                                                                                                                                                                                                                                                                                                                                                                                                                      |                                                                                                                                                                                                                                                                                                                                                                                                                                                                                                                                                                                                                                                                  |                                                                                                                                                  |                                                                                                                                                                                                                                                                                                                                                                                                                                                                                                      |         |  |
|                         |                                                                                                                                                                                                  |                                |                                                           |                                                                                                                                                                                                                                                                                                                                                                                                                                                                                                                       |                                                                                                                                                                                                                                                                                                                                                                        |                                                                                                                                                                                                                                                                                                                                                                                            |                                                                                                                                                                                                                                                                                                                                                                                              |                                                                                                              |                                                                                                                                                                                                                                                                                      |                                                                                                                                                                                                                                                                                                                                                                                                                                                                                                                                                                      |                                                                                                                                                                                                                                                                                                                                                                                                                                                                                                                                                                                                                                                                  |                                                                                                                                                  |                                                                                                                                                                                                                                                                                                                                                                                                                                                                                                      |         |  |
|                         |                                                                                                                                                                                                  |                                |                                                           |                                                                                                                                                                                                                                                                                                                                                                                                                                                                                                                       |                                                                                                                                                                                                                                                                                                                                                                        |                                                                                                                                                                                                                                                                                                                                                                                            |                                                                                                                                                                                                                                                                                                                                                                                              |                                                                                                              |                                                                                                                                                                                                                                                                                      |                                                                                                                                                                                                                                                                                                                                                                                                                                                                                                                                                                      |                                                                                                                                                                                                                                                                                                                                                                                                                                                                                                                                                                                                                                                                  |                                                                                                                                                  |                                                                                                                                                                                                                                                                                                                                                                                                                                                                                                      |         |  |
|                         |                                                                                                                                                                                                  |                                |                                                           |                                                                                                                                                                                                                                                                                                                                                                                                                                                                                                                       |                                                                                                                                                                                                                                                                                                                                                                        |                                                                                                                                                                                                                                                                                                                                                                                            |                                                                                                                                                                                                                                                                                                                                                                                              |                                                                                                              |                                                                                                                                                                                                                                                                                      |                                                                                                                                                                                                                                                                                                                                                                                                                                                                                                                                                                      |                                                                                                                                                                                                                                                                                                                                                                                                                                                                                                                                                                                                                                                                  |                                                                                                                                                  |                                                                                                                                                                                                                                                                                                                                                                                                                                                                                                      |         |  |
|                         |                                                                                                                                                                                                  |                                |                                                           |                                                                                                                                                                                                                                                                                                                                                                                                                                                                                                                       |                                                                                                                                                                                                                                                                                                                                                                        |                                                                                                                                                                                                                                                                                                                                                                                            |                                                                                                                                                                                                                                                                                                                                                                                              |                                                                                                              |                                                                                                                                                                                                                                                                                      |                                                                                                                                                                                                                                                                                                                                                                                                                                                                                                                                                                      |                                                                                                                                                                                                                                                                                                                                                                                                                                                                                                                                                                                                                                                                  |                                                                                                                                                  |                                                                                                                                                                                                                                                                                                                                                                                                                                                                                                      |         |  |
|                         |                                                                                                                                                                                                  |                                |                                                           |                                                                                                                                                                                                                                                                                                                                                                                                                                                                                                                       |                                                                                                                                                                                                                                                                                                                                                                        |                                                                                                                                                                                                                                                                                                                                                                                            |                                                                                                                                                                                                                                                                                                                                                                                              |                                                                                                              |                                                                                                                                                                                                                                                                                      |                                                                                                                                                                                                                                                                                                                                                                                                                                                                                                                                                                      |                                                                                                                                                                                                                                                                                                                                                                                                                                                                                                                                                                                                                                                                  |                                                                                                                                                  |                                                                                                                                                                                                                                                                                                                                                                                                                                                                                                      |         |  |
|                         |                                                                                                                                                                                                  |                                |                                                           |                                                                                                                                                                                                                                                                                                                                                                                                                                                                                                                       |                                                                                                                                                                                                                                                                                                                                                                        |                                                                                                                                                                                                                                                                                                                                                                                            |                                                                                                                                                                                                                                                                                                                                                                                              |                                                                                                              |                                                                                                                                                                                                                                                                                      |                                                                                                                                                                                                                                                                                                                                                                                                                                                                                                                                                                      |                                                                                                                                                                                                                                                                                                                                                                                                                                                                                                                                                                                                                                                                  |                                                                                                                                                  |                                                                                                                                                                                                                                                                                                                                                                                                                                                                                                      |         |  |
|                         |                                                                                                                                                                                                  |                                |                                                           |                                                                                                                                                                                                                                                                                                                                                                                                                                                                                                                       |                                                                                                                                                                                                                                                                                                                                                                        |                                                                                                                                                                                                                                                                                                                                                                                            |                                                                                                                                                                                                                                                                                                                                                                                              |                                                                                                              |                                                                                                                                                                                                                                                                                      |                                                                                                                                                                                                                                                                                                                                                                                                                                                                                                                                                                      |                                                                                                                                                                                                                                                                                                                                                                                                                                                                                                                                                                                                                                                                  |                                                                                                                                                  |                                                                                                                                                                                                                                                                                                                                                                                                                                                                                                      |         |  |
|                         |                                                                                                                                                                                                  |                                |                                                           |                                                                                                                                                                                                                                                                                                                                                                                                                                                                                                                       |                                                                                                                                                                                                                                                                                                                                                                        |                                                                                                                                                                                                                                                                                                                                                                                            |                                                                                                                                                                                                                                                                                                                                                                                              |                                                                                                              |                                                                                                                                                                                                                                                                                      |                                                                                                                                                                                                                                                                                                                                                                                                                                                                                                                                                                      |                                                                                                                                                                                                                                                                                                                                                                                                                                                                                                                                                                                                                                                                  |                                                                                                                                                  |                                                                                                                                                                                                                                                                                                                                                                                                                                                                                                      |         |  |
|                         |                                                                                                                                                                                                  |                                |                                                           |                                                                                                                                                                                                                                                                                                                                                                                                                                                                                                                       |                                                                                                                                                                                                                                                                                                                                                                        |                                                                                                                                                                                                                                                                                                                                                                                            |                                                                                                                                                                                                                                                                                                                                                                                              |                                                                                                              |                                                                                                                                                                                                                                                                                      |                                                                                                                                                                                                                                                                                                                                                                                                                                                                                                                                                                      |                                                                                                                                                                                                                                                                                                                                                                                                                                                                                                                                                                                                                                                                  |                                                                                                                                                  |                                                                                                                                                                                                                                                                                                                                                                                                                                                                                                      |         |  |
|                         |                                                                                                                                                                                                  |                                |                                                           |                                                                                                                                                                                                                                                                                                                                                                                                                                                                                                                       |                                                                                                                                                                                                                                                                                                                                                                        |                                                                                                                                                                                                                                                                                                                                                                                            |                                                                                                                                                                                                                                                                                                                                                                                              |                                                                                                              |                                                                                                                                                                                                                                                                                      |                                                                                                                                                                                                                                                                                                                                                                                                                                                                                                                                                                      |                                                                                                                                                                                                                                                                                                                                                                                                                                                                                                                                                                                                                                                                  |                                                                                                                                                  |                                                                                                                                                                                                                                                                                                                                                                                                                                                                                                      |         |  |
|                         |                                                                                                                                                                                                  |                                |                                                           |                                                                                                                                                                                                                                                                                                                                                                                                                                                                                                                       |                                                                                                                                                                                                                                                                                                                                                                        |                                                                                                                                                                                                                                                                                                                                                                                            |                                                                                                                                                                                                                                                                                                                                                                                              |                                                                                                              |                                                                                                                                                                                                                                                                                      |                                                                                                                                                                                                                                                                                                                                                                                                                                                                                                                                                                      |                                                                                                                                                                                                                                                                                                                                                                                                                                                                                                                                                                                                                                                                  |                                                                                                                                                  |                                                                                                                                                                                                                                                                                                                                                                                                                                                                                                      |         |  |
|                         |                                                                                                                                                                                                  |                                |                                                           |                                                                                                                                                                                                                                                                                                                                                                                                                                                                                                                       |                                                                                                                                                                                                                                                                                                                                                                        |                                                                                                                                                                                                                                                                                                                                                                                            |                                                                                                                                                                                                                                                                                                                                                                                              |                                                                                                              |                                                                                                                                                                                                                                                                                      |                                                                                                                                                                                                                                                                                                                                                                                                                                                                                                                                                                      |                                                                                                                                                                                                                                                                                                                                                                                                                                                                                                                                                                                                                                                                  |                                                                                                                                                  |                                                                                                                                                                                                                                                                                                                                                                                                                                                                                                      |         |  |
|                         |                                                                                                                                                                                                  |                                |                                                           |                                                                                                                                                                                                                                                                                                                                                                                                                                                                                                                       |                                                                                                                                                                                                                                                                                                                                                                        |                                                                                                                                                                                                                                                                                                                                                                                            |                                                                                                                                                                                                                                                                                                                                                                                              |                                                                                                              |                                                                                                                                                                                                                                                                                      |                                                                                                                                                                                                                                                                                                                                                                                                                                                                                                                                                                      |                                                                                                                                                                                                                                                                                                                                                                                                                                                                                                                                                                                                                                                                  |                                                                                                                                                  |                                                                                                                                                                                                                                                                                                                                                                                                                                                                                                      |         |  |
|                         |                                                                                                                                                                                                  |                                |                                                           |                                                                                                                                                                                                                                                                                                                                                                                                                                                                                                                       |                                                                                                                                                                                                                                                                                                                                                                        |                                                                                                                                                                                                                                                                                                                                                                                            |                                                                                                                                                                                                                                                                                                                                                                                              |                                                                                                              |                                                                                                                                                                                                                                                                                      |                                                                                                                                                                                                                                                                                                                                                                                                                                                                                                                                                                      |                                                                                                                                                                                                                                                                                                                                                                                                                                                                                                                                                                                                                                                                  |                                                                                                                                                  |                                                                                                                                                                                                                                                                                                                                                                                                                                                                                                      |         |  |
|                         |                                                                                                                                                                                                  |                                |                                                           |                                                                                                                                                                                                                                                                                                                                                                                                                                                                                                                       |                                                                                                                                                                                                                                                                                                                                                                        |                                                                                                                                                                                                                                                                                                                                                                                            |                                                                                                                                                                                                                                                                                                                                                                                              |                                                                                                              |                                                                                                                                                                                                                                                                                      |                                                                                                                                                                                                                                                                                                                                                                                                                                                                                                                                                                      |                                                                                                                                                                                                                                                                                                                                                                                                                                                                                                                                                                                                                                                                  |                                                                                                                                                  |                                                                                                                                                                                                                                                                                                                                                                                                                                                                                                      |         |  |

[illegible]
