# Supplementary material
Source: publisher figshare collection journal article supplement (https://tandf.figshare.com/articles/dataset/_/5982280)
Supplement: Supplementary file 8 [file 1]

| TYPE OF INFRASTRUCTURE AND DESCRIPTION                                                           | REFERENCE                                                                                                                                                                                                                                                                                                                                                                  | ORIGIN/CITY                         | TARGETED INDIVIDUALS                                                          | AIM / OBJECTIVES / HYPOTHESES                                                                                                                                                                                                                                                                                                                                                                                                                                                                                                                                                                                                                                                                                                                                                                                                                                                                                                                                                                                            | JUSTIFICATION                                                                                                                                                                                                                                                                                                                                                                                                                                                                                                                                                                                                                                                                                                                                                                                                                                                                                                                                                                                                                                                                                                             | STUDY DESIGN                                                                                                                                                                                                                                                                                                                                                                                                                                                                                                                                                                                        | VARIABLES AND INDICATORS STUDIED                      | SPECIFICATIONS ON THE FEATURES AND INFRASTRUCTURES                                                                                                                                                                                                                                                                                                                                                                                                                                                                                                                                                                                                                                                                                                                                                                                                                                                                                                                                                                                            | QUALITY |
|--------------------------------------------------------------------------------------------------|----------------------------------------------------------------------------------------------------------------------------------------------------------------------------------------------------------------------------------------------------------------------------------------------------------------------------------------------------------------------------|-------------------------------------|-------------------------------------------------------------------------------|--------------------------------------------------------------------------------------------------------------------------------------------------------------------------------------------------------------------------------------------------------------------------------------------------------------------------------------------------------------------------------------------------------------------------------------------------------------------------------------------------------------------------------------------------------------------------------------------------------------------------------------------------------------------------------------------------------------------------------------------------------------------------------------------------------------------------------------------------------------------------------------------------------------------------------------------------------------------------------------------------------------------------|---------------------------------------------------------------------------------------------------------------------------------------------------------------------------------------------------------------------------------------------------------------------------------------------------------------------------------------------------------------------------------------------------------------------------------------------------------------------------------------------------------------------------------------------------------------------------------------------------------------------------------------------------------------------------------------------------------------------------------------------------------------------------------------------------------------------------------------------------------------------------------------------------------------------------------------------------------------------------------------------------------------------------------------------------------------------------------------------------------------------------|-----------------------------------------------------------------------------------------------------------------------------------------------------------------------------------------------------------------------------------------------------------------------------------------------------------------------------------------------------------------------------------------------------------------------------------------------------------------------------------------------------------------------------------------------------------------------------------------------------|-------------------------------------------------------|-----------------------------------------------------------------------------------------------------------------------------------------------------------------------------------------------------------------------------------------------------------------------------------------------------------------------------------------------------------------------------------------------------------------------------------------------------------------------------------------------------------------------------------------------------------------------------------------------------------------------------------------------------------------------------------------------------------------------------------------------------------------------------------------------------------------------------------------------------------------------------------------------------------------------------------------------------------------------------------------------------------------------------------------------|---------|
| Sidewalk, pedestrian crossing                                                                    | Duncan-Jones, G. (2011). Modern road crossing designs and visually impaired people. <i>Municipal Engineer</i> , 146 (2): 185-190.                                                                                                                                                                                                                                          | London, United Kingdom              | Visually impaired                                                             | Describe and discuss the most suitable features and the best practices in order to achieve accessible urban environments for visually impaired and blind people.                                                                                                                                                                                                                                                                                                                                                                                                                                                                                                                                                                                                                                                                                                                                                                                                                                                         | Many visually impaired people withdraw from going out because they feel they cannot cope with the level of difficulties they encounter when out alone, especially at road crossings and obstacles on the footway.                                                                                                                                                                                                                                                                                                                                                                                                                                                                                                                                                                                                                                                                                                                                                                                                                                                                                                         | Descriptive study                                                                                                                                                                                                                                                                                                                                                                                                                                                                                                                                                                                   | Sidewalk kerbs                                        | They must be on both sides of the tactile paving and should have a detectable height (not specified) to delineate the sidewalk from the pedestrian crossing. Street corners that have lowered kerbs are hazardous. If the tactile paving is not provided and the crossing area is made flat and flush with the tarmac, a blind person who crosses across such a crossing cannot tell if they have stepped onto the road or if they are still on the highway.                                                                                                                                                                                                                                                                                                                                                                                                                                                                                                                                                                                  | 7       |
|                                                                                                  |                                                                                                                                                                                                                                                                                                                                                                            |                                     |                                                                               |                                                                                                                                                                                                                                                                                                                                                                                                                                                                                                                                                                                                                                                                                                                                                                                                                                                                                                                                                                                                                          |                                                                                                                                                                                                                                                                                                                                                                                                                                                                                                                                                                                                                                                                                                                                                                                                                                                                                                                                                                                                                                                                                                                           |                                                                                                                                                                                                                                                                                                                                                                                                                                                                                                                                                                                                     | Sidewalk delineation and pedestrian crossing          | The tactile paving should be correctly delineated by the kerb. The most dangerous junctions are the ones where a side road joins a main road at a point where the main road bends, visually impaired people are not able to read the gradual change of direction. Some crossings have tactile paving correctly laid but the dropped kerb extends beyond the tactile surface so that the area on both sides of the crossing is level and flush with the road. Visually impaired people are not navigated in a perfect safety on the footway. Color schemes that are easy to understand and are consistent with the national system of color-coded tactile paving can help such a person to locate the crossing.                                                                                                                                                                                                                                                                                                                                |         |
|                                                                                                  |                                                                                                                                                                                                                                                                                                                                                                            |                                     |                                                                               |                                                                                                                                                                                                                                                                                                                                                                                                                                                                                                                                                                                                                                                                                                                                                                                                                                                                                                                                                                                                                          |                                                                                                                                                                                                                                                                                                                                                                                                                                                                                                                                                                                                                                                                                                                                                                                                                                                                                                                                                                                                                                                                                                                           |                                                                                                                                                                                                                                                                                                                                                                                                                                                                                                                                                                                                     | Sidewalk pavement treatment                           | Contrast on surfaces by different materials should be ensured, for tactile detection with a long cane and for visual detection by vision-impaired pedestrians. If there is no raised kerb separating green fields from the crossing point and the tactile paving then the design is that the person may learn to perceive the tactile blocks as tactile paving and be unable to distinguish between the surfaces.                                                                                                                                                                                                                                                                                                                                                                                                                                                                                                                                                                                                                             |         |
|                                                                                                  |                                                                                                                                                                                                                                                                                                                                                                            |                                     |                                                                               |                                                                                                                                                                                                                                                                                                                                                                                                                                                                                                                                                                                                                                                                                                                                                                                                                                                                                                                                                                                                                          |                                                                                                                                                                                                                                                                                                                                                                                                                                                                                                                                                                                                                                                                                                                                                                                                                                                                                                                                                                                                                                                                                                                           |                                                                                                                                                                                                                                                                                                                                                                                                                                                                                                                                                                                                     | Sidewalk urban furniture                              | Benches are exceptionally hazardous and must cause people to trip and fall, whereas wheel-height bollards would not. Litter bins should not make the walkable portion of the sidewalk. These elements should not be positioned at a bus stop where people get on and off the bus, or at a street corner where it blocks the view of drivers. Obstacles protruding over the footpath at face level (signs attached to poles, trees, bushes, other items hung on lampposts) are very hazardous for blind pedestrians, both when and outside the users, as they cannot be warned of obstacles at face level.                                                                                                                                                                                                                                                                                                                                                                                                                                     |         |
|                                                                                                  |                                                                                                                                                                                                                                                                                                                                                                            |                                     |                                                                               |                                                                                                                                                                                                                                                                                                                                                                                                                                                                                                                                                                                                                                                                                                                                                                                                                                                                                                                                                                                                                          |                                                                                                                                                                                                                                                                                                                                                                                                                                                                                                                                                                                                                                                                                                                                                                                                                                                                                                                                                                                                                                                                                                                           |                                                                                                                                                                                                                                                                                                                                                                                                                                                                                                                                                                                                     | Refurbishment                                         | Serious problems can occur when the design of one crossing interferes with the design of another. The existence of an island in the middle can determine whether it is a single or a double crossing. A blind pedestrian would be confused as the auditory message would give a signal to proceed across the road without stopping, while the tactile paving on the island would reduce the need to stop at the center of the road. Regular inspections of protruding objects should be carried out by highway departments responsible for potholes and the general condition of the carriageways. Also, traffic wardens, who already walk the pavements, could report on the state of the footway.                                                                                                                                                                                                                                                                                                                                           |         |
| Maintenance                                                                                      | Tactile paving that delineates a controlled crossing should not be installed until the crossing is operational as it may encourage a blind person to use a site that is not safe.                                                                                                                                                                                          |                                     |                                                                               |                                                                                                                                                                                                                                                                                                                                                                                                                                                                                                                                                                                                                                                                                                                                                                                                                                                                                                                                                                                                                          |                                                                                                                                                                                                                                                                                                                                                                                                                                                                                                                                                                                                                                                                                                                                                                                                                                                                                                                                                                                                                                                                                                                           |                                                                                                                                                                                                                                                                                                                                                                                                                                                                                                                                                                                                     |                                                       |                                                                                                                                                                                                                                                                                                                                                                                                                                                                                                                                                                                                                                                                                                                                                                                                                                                                                                                                                                                                                                               |         |
| Sidewalk, ramp, public space, lighting                                                           | York, S.L. (2009). Recreational design and outdoor area visually impaired accessibility. <i>Northumbria University</i> , 25 (3): 201-208.                                                                                                                                                                                                                                  | Bloomington, Indiana, United States | Neurological impairments                                                      | Describe the characteristics of outdoor environments for them to be accessible to people with complex neurological conditions. Prepare technical features related to the infrastructures that make up outdoor environments.                                                                                                                                                                                                                                                                                                                                                                                                                                                                                                                                                                                                                                                                                                                                                                                              | Whether a person lives at home or in a residential facility, access to the outdoor environment can have many positive and therapeutic effects. Opportunities to experience the outdoors provide exposure to fresh air and sunlight, facilitate improved function through physical activities such as walking and gardening, foster socialization, and enable leisure pursuits.                                                                                                                                                                                                                                                                                                                                                                                                                                                                                                                                                                                                                                                                                                                                            | Descriptive study. The technical issues are based on "Accessibility Guidelines for Outdoor Developed Areas" and the seven Principles of Universal Design.                                                                                                                                                                                                                                                                                                                                                                                                                                           | Sidewalk design: Running steps, cross steps, width    | Running steps should not be greater than 5%, and cross steps should not be greater than 2% (if the running slope is greater than 5%, the sidewalk becomes a ramp) with between 3 and 3.6 ft. A width of 3 ft is the minimum but a 5-ft-wide sidewalk allows wheelchair users. Level walkways reduce the risk of falls and should provide enough space for drainage.                                                                                                                                                                                                                                                                                                                                                                                                                                                                                                                                                                                                                                                                           | 23      |
|                                                                                                  |                                                                                                                                                                                                                                                                                                                                                                            |                                     |                                                                               |                                                                                                                                                                                                                                                                                                                                                                                                                                                                                                                                                                                                                                                                                                                                                                                                                                                                                                                                                                                                                          |                                                                                                                                                                                                                                                                                                                                                                                                                                                                                                                                                                                                                                                                                                                                                                                                                                                                                                                                                                                                                                                                                                                           |                                                                                                                                                                                                                                                                                                                                                                                                                                                                                                                                                                                                     | Sidewalk pavement treatment                           | Flat, stable and slip resistant. Uniform surfaces, such as asphalt and concrete, are considered accessible surfaces, and paving bricks is also compliant with accessibility standards if appropriately applied and maintained. Recycled plastic lumber is colored and designed to have the look of natural wood without the long term maintenance needs of real wood. The edges of the pathway should be flush with the surrounding grade to accommodate use of a wheelchair. Recycled rubber or crushed stone on the path. Depending on the grade and drainage of the pathway, edge protection may be needed to reduce surface material wastage. For people with low vision or who are blind, the use of materials with different texture or contrasting colors placed across pathways are used to indicate the presence of obstacles or, when walking, other key points of information along the route. Accessible surfaces: asphalt, concrete, brick, wood, plastic.                                                                       |         |
|                                                                                                  |                                                                                                                                                                                                                                                                                                                                                                            |                                     |                                                                               |                                                                                                                                                                                                                                                                                                                                                                                                                                                                                                                                                                                                                                                                                                                                                                                                                                                                                                                                                                                                                          |                                                                                                                                                                                                                                                                                                                                                                                                                                                                                                                                                                                                                                                                                                                                                                                                                                                                                                                                                                                                                                                                                                                           |                                                                                                                                                                                                                                                                                                                                                                                                                                                                                                                                                                                                     | Ramp design: Running steps, cross steps, public space | Running steps should not be greater than 5%, and cross steps should not be greater than 2% or 1/20 (least possible running slope), handrails must provide a 3-ft-wide sidewalk. A ramp designed with the least possible running slope is considered the safest ramp of all.                                                                                                                                                                                                                                                                                                                                                                                                                                                                                                                                                                                                                                                                                                                                                                   |         |
|                                                                                                  |                                                                                                                                                                                                                                                                                                                                                                            |                                     |                                                                               |                                                                                                                                                                                                                                                                                                                                                                                                                                                                                                                                                                                                                                                                                                                                                                                                                                                                                                                                                                                                                          |                                                                                                                                                                                                                                                                                                                                                                                                                                                                                                                                                                                                                                                                                                                                                                                                                                                                                                                                                                                                                                                                                                                           |                                                                                                                                                                                                                                                                                                                                                                                                                                                                                                                                                                                                     | Public space: Sitting on benches                      | If benches are provided they should have backrests along the entire length and at least one end. Seating should always have adjacent space that allows shoulder-to-shoulder seating for someone using a wheelchair. Seat heights should be designed to allow easy standing (19 inches from the ground). Footrests on seating should be foldable. Seating areas should provide opportunities for shade, be a seating order trees, an overhang or an overhang that offering protection from the sun and shelter from precipitation.                                                                                                                                                                                                                                                                                                                                                                                                                                                                                                             |         |
|                                                                                                  |                                                                                                                                                                                                                                                                                                                                                                            |                                     |                                                                               |                                                                                                                                                                                                                                                                                                                                                                                                                                                                                                                                                                                                                                                                                                                                                                                                                                                                                                                                                                                                                          |                                                                                                                                                                                                                                                                                                                                                                                                                                                                                                                                                                                                                                                                                                                                                                                                                                                                                                                                                                                                                                                                                                                           |                                                                                                                                                                                                                                                                                                                                                                                                                                                                                                                                                                                                     | Lighting                                              | Prosignlights, signposts, landscape lighting, and the use of full spectrum bulbs will enhance nighttime visibility and safety. Automatic sensor lights can also be installed for security.                                                                                                                                                                                                                                                                                                                                                                                                                                                                                                                                                                                                                                                                                                                                                                                                                                                    |         |
| Sidewalk, ramp, curb cut, pedestrian crossings, street signage                                   | Tomic, S. (2003). Hamilton Urban Braille System: Urban design for an Aging Society. <i>Plan International</i> , 2003: 41-43.                                                                                                                                                                                                                                               | Hamilton, ON, Canada                | Visually impaired, elderly, inform and aware of a variety of mobility devices | Discuss the features of the "Made in Hamilton" Urban Braille System developed collaboratively by the City of Hamilton, McMaster University and the Canadian National Institute for the Blind through three projects (1996-2002). One of them was the reconstruction of Hamilton's Parkdale Street.                                                                                                                                                                                                                                                                                                                                                                                                                                                                                                                                                                                                                                                                                                                       | Although great progress has been achieved with respect to accessibility in barrier free design of buildings, sidewalks and open spaces between buildings are still not designed, constructed and maintained to ensure free movement, safety and comfort for people with special needs. Public spaces are the living rooms of our communities.                                                                                                                                                                                                                                                                                                                                                                                                                                                                                                                                                                                                                                                                                                                                                                             | Descriptive study                                                                                                                                                                                                                                                                                                                                                                                                                                                                                                                                                                                   | Planning and general design requirements              | Should be in harmony with the local climate (four season design) and use of strategies such as direct and reflected sun, shade control, wind control, wind services, protection against weather elements and construction of sun pits.                                                                                                                                                                                                                                                                                                                                                                                                                                                                                                                                                                                                                                                                                                                                                                                                        | 9       |
|                                                                                                  |                                                                                                                                                                                                                                                                                                                                                                            |                                     |                                                                               |                                                                                                                                                                                                                                                                                                                                                                                                                                                                                                                                                                                                                                                                                                                                                                                                                                                                                                                                                                                                                          |                                                                                                                                                                                                                                                                                                                                                                                                                                                                                                                                                                                                                                                                                                                                                                                                                                                                                                                                                                                                                                                                                                                           |                                                                                                                                                                                                                                                                                                                                                                                                                                                                                                                                                                                                     | Sidewalk width                                        | Must ensure freedom of movement. Major pathway: unobstructed paths for wheelchair and scooter users. All obstructions must be outside the limits of the main pathway. The wheelchair path must be a minimum of 1.5m wide when measured inside the shoulders.                                                                                                                                                                                                                                                                                                                                                                                                                                                                                                                                                                                                                                                                                                                                                                                  |         |
|                                                                                                  |                                                                                                                                                                                                                                                                                                                                                                            |                                     |                                                                               |                                                                                                                                                                                                                                                                                                                                                                                                                                                                                                                                                                                                                                                                                                                                                                                                                                                                                                                                                                                                                          |                                                                                                                                                                                                                                                                                                                                                                                                                                                                                                                                                                                                                                                                                                                                                                                                                                                                                                                                                                                                                                                                                                                           |                                                                                                                                                                                                                                                                                                                                                                                                                                                                                                                                                                                                     | Sidewalk delineation (define lines)                   | Minor pathway: must be converted as an alternate route and as an opportunity to access areas containing obstacles. Highly contrasting lines mark wheelchair paths. Allow wide and continuous of dark grey stamped concrete, granite or other suitable materials.                                                                                                                                                                                                                                                                                                                                                                                                                                                                                                                                                                                                                                                                                                                                                                              |         |
|                                                                                                  |                                                                                                                                                                                                                                                                                                                                                                            |                                     |                                                                               |                                                                                                                                                                                                                                                                                                                                                                                                                                                                                                                                                                                                                                                                                                                                                                                                                                                                                                                                                                                                                          |                                                                                                                                                                                                                                                                                                                                                                                                                                                                                                                                                                                                                                                                                                                                                                                                                                                                                                                                                                                                                                                                                                                           |                                                                                                                                                                                                                                                                                                                                                                                                                                                                                                                                                                                                     | Tactile information                                   | Tactile information can be located within a wheelchair path that is 1.5m wide. The blind and visually impaired can be trained to distinguish 4 or 5 materials and a variety of textures with their hand or cane. In fact, it requires only 2 textures (smooth and grooved) on sidewalks and other horizontal surfaces to produce a 10 distinct classes or textures of tactile information. Hamilton Braille System communicates the following information: directional change (compass N-S-E-W), hierarchy of pathways (major vs minor), entrances to buildings, sidewalk and road boundaries, ramps vs raised pedestrian crossings/intersections, signage/walking, other information (e.g. underground, social activities, building information, business information, addresses, etc.).                                                                                                                                                                                                                                                     |         |
|                                                                                                  |                                                                                                                                                                                                                                                                                                                                                                            |                                     |                                                                               |                                                                                                                                                                                                                                                                                                                                                                                                                                                                                                                                                                                                                                                                                                                                                                                                                                                                                                                                                                                                                          |                                                                                                                                                                                                                                                                                                                                                                                                                                                                                                                                                                                                                                                                                                                                                                                                                                                                                                                                                                                                                                                                                                                           |                                                                                                                                                                                                                                                                                                                                                                                                                                                                                                                                                                                                     | Textured bands on intersections                       | Described in most of the literature as intersection advance warning or a wheelchair path in areas such as the following: at the start and end of driveway approaches; at corners, parallel to and behind the curb within the limit of wheelchair ramps; perpendicular to roadways on other side of the grey portion of the intersection; at the start and end of driveway approaches.                                                                                                                                                                                                                                                                                                                                                                                                                                                                                                                                                                                                                                                         |         |
| Decision nodes on intersections                                                                  | Should be located perpendicular to and between the sides of a wheelchair path in areas such as the following: at the start and end of driveway approaches; at corners, parallel to and behind the curb within the limit of wheelchair ramps; perpendicular to roadways on other side of the grey portion of the intersection; at the start and end of driveway approaches. |                                     |                                                                               |                                                                                                                                                                                                                                                                                                                                                                                                                                                                                                                                                                                                                                                                                                                                                                                                                                                                                                                                                                                                                          |                                                                                                                                                                                                                                                                                                                                                                                                                                                                                                                                                                                                                                                                                                                                                                                                                                                                                                                                                                                                                                                                                                                           |                                                                                                                                                                                                                                                                                                                                                                                                                                                                                                                                                                                                     |                                                       |                                                                                                                                                                                                                                                                                                                                                                                                                                                                                                                                                                                                                                                                                                                                                                                                                                                                                                                                                                                                                                               |         |
| Street name sidewalk plates                                                                      | Located at corners to indicate intersecting streets, show the name of the street that is perpendicular to the path of travel, or to read facing the street.                                                                                                                                                                                                                |                                     |                                                                               |                                                                                                                                                                                                                                                                                                                                                                                                                                                                                                                                                                                                                                                                                                                                                                                                                                                                                                                                                                                                                          |                                                                                                                                                                                                                                                                                                                                                                                                                                                                                                                                                                                                                                                                                                                                                                                                                                                                                                                                                                                                                                                                                                                           |                                                                                                                                                                                                                                                                                                                                                                                                                                                                                                                                                                                                     |                                                       |                                                                                                                                                                                                                                                                                                                                                                                                                                                                                                                                                                                                                                                                                                                                                                                                                                                                                                                                                                                                                                               |         |
| Street name signage                                                                              | Located on corners and streetlights poles. Larger plates allow for more traffic safety and space saving.                                                                                                                                                                                                                                                                   |                                     |                                                                               |                                                                                                                                                                                                                                                                                                                                                                                                                                                                                                                                                                                                                                                                                                                                                                                                                                                                                                                                                                                                                          |                                                                                                                                                                                                                                                                                                                                                                                                                                                                                                                                                                                                                                                                                                                                                                                                                                                                                                                                                                                                                                                                                                                           |                                                                                                                                                                                                                                                                                                                                                                                                                                                                                                                                                                                                     |                                                       |                                                                                                                                                                                                                                                                                                                                                                                                                                                                                                                                                                                                                                                                                                                                                                                                                                                                                                                                                                                                                                               |         |
| Sidewalk delineation: Visual and audio timing                                                    | Visual and audio timing should be used in conjunction with pedestrian traffic lights.                                                                                                                                                                                                                                                                                      |                                     |                                                                               |                                                                                                                                                                                                                                                                                                                                                                                                                                                                                                                                                                                                                                                                                                                                                                                                                                                                                                                                                                                                                          |                                                                                                                                                                                                                                                                                                                                                                                                                                                                                                                                                                                                                                                                                                                                                                                                                                                                                                                                                                                                                                                                                                                           |                                                                                                                                                                                                                                                                                                                                                                                                                                                                                                                                                                                                     |                                                       |                                                                                                                                                                                                                                                                                                                                                                                                                                                                                                                                                                                                                                                                                                                                                                                                                                                                                                                                                                                                                                               |         |
| Bus stop / Bus shelter decision site                                                             | Must be approved by a public transportation agency.                                                                                                                                                                                                                                                                                                                        |                                     |                                                                               |                                                                                                                                                                                                                                                                                                                                                                                                                                                                                                                                                                                                                                                                                                                                                                                                                                                                                                                                                                                                                          |                                                                                                                                                                                                                                                                                                                                                                                                                                                                                                                                                                                                                                                                                                                                                                                                                                                                                                                                                                                                                                                                                                                           |                                                                                                                                                                                                                                                                                                                                                                                                                                                                                                                                                                                                     |                                                       |                                                                                                                                                                                                                                                                                                                                                                                                                                                                                                                                                                                                                                                                                                                                                                                                                                                                                                                                                                                                                                               |         |
| Street design, sidewalk, pedestrian crossings, bus stops                                         | Nerguis, S. H. (2012). Accessibility of urban spaces for visually impaired pedestrians. <i>Proceedings of the Institution of Civil Engineers</i> , municipal engineer, 165 (4): 221-237.                                                                                                                                                                                   | Manchester, United Kingdom          | Visually impaired and elderly                                                 | Present the results of 3 initiatives in the United Kingdom on accessibility of urban spaces to visually impaired pedestrians, focusing on sidewalks. These initiatives are "Age Friendly" Cities, Guide Dogs UK, and the Department of Transport's shared spaces local transportation route.                                                                                                                                                                                                                                                                                                                                                                                                                                                                                                                                                                                                                                                                                                                             | Visual impairment is an established risk factor for loss of independence, being one of the 4 most significant potential contributors to loss of independence among older people. People who are blind or visually impaired are known to report a fear of falling (Gallagher et al., 2011). People with a sight loss are 1.7 times more likely to have a fall (Leggett et al., 2002).                                                                                                                                                                                                                                                                                                                                                                                                                                                                                                                                                                                                                                                                                                                                      | Descriptive study of the 3 initiatives under 5 key themes: Pedestrian priority, Wayways and pedestrian routes, Pavements, kerbs and surface differentiation, Street crossings and intersections, and Access to transit systems, signage and signage. Analysis of documents issued by the institutions that hosted the initiative. It is supported on other studies addressing design features regarding the infrastructures analyzed.                                                                                                                                                               | Street design: Shared streets, non-segregated         | Guide Dogs UK states that priority for pedestrians should take precedence over all other forms of transport on designated footways in traditional streets and also in shared space designs. Regarding the DfT local transport role, the shared space concept when it is "reducing the dominance of motor vehicles and enabling all users to share the space". When pedestrian density is high and includes children and elderly, drivers are less willing to share space, concerns by blind and partially sighted people that shared spaces would reduce independence, hybrid electric cars might become a new risk since they reduce the noise that alerts visually impaired people.                                                                                                                                                                                                                                                                                                                                                         | 14      |
|                                                                                                  |                                                                                                                                                                                                                                                                                                                                                                            |                                     |                                                                               |                                                                                                                                                                                                                                                                                                                                                                                                                                                                                                                                                                                                                                                                                                                                                                                                                                                                                                                                                                                                                          |                                                                                                                                                                                                                                                                                                                                                                                                                                                                                                                                                                                                                                                                                                                                                                                                                                                                                                                                                                                                                                                                                                                           |                                                                                                                                                                                                                                                                                                                                                                                                                                                                                                                                                                                                     | Sidewalk delineation: Kerbs                           | When higher than 40mm, it presents risks. It must have an appropriate height to avoid falls. Kerbs of lower height were not always detected in a study (Duncan-Jones, 2011). Used in conjunction with dropped kerbs and tactile paving, a minimum kerb height was viewed as a way to delineate the walking for all pedestrians, especially vulnerable users. On a study, nearly a quarter of pedestrians were injured by a fall involving a kerb: pointing of marking kerbs might be a solution.                                                                                                                                                                                                                                                                                                                                                                                                                                                                                                                                              |         |
|                                                                                                  |                                                                                                                                                                                                                                                                                                                                                                            |                                     |                                                                               |                                                                                                                                                                                                                                                                                                                                                                                                                                                                                                                                                                                                                                                                                                                                                                                                                                                                                                                                                                                                                          |                                                                                                                                                                                                                                                                                                                                                                                                                                                                                                                                                                                                                                                                                                                                                                                                                                                                                                                                                                                                                                                                                                                           |                                                                                                                                                                                                                                                                                                                                                                                                                                                                                                                                                                                                     | Sidewalk delineation: Tactile guidance paths          | It might be a barrier for other users, some patterns may lead to some degree of change in balance and stability.                                                                                                                                                                                                                                                                                                                                                                                                                                                                                                                                                                                                                                                                                                                                                                                                                                                                                                                              |         |
|                                                                                                  |                                                                                                                                                                                                                                                                                                                                                                            |                                     |                                                                               |                                                                                                                                                                                                                                                                                                                                                                                                                                                                                                                                                                                                                                                                                                                                                                                                                                                                                                                                                                                                                          |                                                                                                                                                                                                                                                                                                                                                                                                                                                                                                                                                                                                                                                                                                                                                                                                                                                                                                                                                                                                                                                                                                                           |                                                                                                                                                                                                                                                                                                                                                                                                                                                                                                                                                                                                     | Sidewalk delineation: Visual contrast                 | Fixed color contrast enables partially sighted users to perceive boundaries such as the edge of the carriageway. On dark pavements the asphalt, lighter colored detectable warnings with a high-reflectance kerbs should be used. Correlated surface patterns can lead to discrimination.                                                                                                                                                                                                                                                                                                                                                                                                                                                                                                                                                                                                                                                                                                                                                     |         |
|                                                                                                  |                                                                                                                                                                                                                                                                                                                                                                            |                                     |                                                                               |                                                                                                                                                                                                                                                                                                                                                                                                                                                                                                                                                                                                                                                                                                                                                                                                                                                                                                                                                                                                                          |                                                                                                                                                                                                                                                                                                                                                                                                                                                                                                                                                                                                                                                                                                                                                                                                                                                                                                                                                                                                                                                                                                                           |                                                                                                                                                                                                                                                                                                                                                                                                                                                                                                                                                                                                     | Sidewalk delineation: Bollards and street furniture   | Dark surfaces, especially in hazy weather, can create significant problems for blind and partially sighted people who often use kerbs to define control space and to navigate by. It must be made depending of the circumstance and depending on the physical context of the street. Guide Dogs UK indicates that bollards and furniture need to be set at the main pedestrian flow and not parallel themselves to it. Additional dimensions: the tactile paving and visual contrast could be used to aid in the situation. Obstacles that are temporary or not consistent in time or use of location (delivering A-bombs, furniture) can be a problem for all users. Management and enforcement practices should be in place to ensure that potential obstacles are either positioned in clearly defined ways away from pedestrian routes or removed. Where potential obstacles are incorporated, these should be clearly identifiable to all users by the use of visual contrast and surface level tactile indicators and/or lighting aids. |         |
| Street design, sidewalk, pedestrian crossings, bus stops                                         | Huglin, Y. (2008). Facilité la vie aux personnes à mobilité réduite. <i>La Revue</i> , 16 juin 2008: 62-64.                                                                                                                                                                                                                                                                | Marseille, France                   | Mobility impaired, elderly                                                    | Describe urban infrastructures and features that allow the development of inclusive urban spaces. Using an obstacle solution methodology, the project addresses the pedestrian later by the City of Marseille. The City, the Centre d'Etude des techniques de l'équipement (CETE) and the DCE des Bouches-du-Rhône prepared a cartographic system. It contains the downtown open public spaces around the City Hall. All the obstacle features were identified and they received an intervention priority, with regards with the introduction of a tramway system.                                                                                                                                                                                                                                                                                                                                                                                                                                                       | 6.2 million French adults declare having difficulties circulating outside their home. This situation negatively impacts the quality of urban infrastructures and the comfort of living in the city.                                                                                                                                                                                                                                                                                                                                                                                                                                                                                                                                                                                                                                                                                                                                                                                                                                                                                                                       | Descriptive study                                                                                                                                                                                                                                                                                                                                                                                                                                                                                                                                                                                   | Surface                                               | Pavements should be non-slip, with enough for wheelchairs and have dropped kerbs to road level to take into account users with mobility needs. Artificial surfaces can be utilized to create detectable safety warnings (e.g. lateral surfaces) of carriageway edges, cut as hazard alert (e.g. concourse surface) for bicyclists and pedestrians (e.g. 2m) and unobstructed to indicate rows.                                                                                                                                                                                                                                                                                                                                                                                                                                                                                                                                                                                                                                                | 19      |
|                                                                                                  |                                                                                                                                                                                                                                                                                                                                                                            |                                     |                                                                               |                                                                                                                                                                                                                                                                                                                                                                                                                                                                                                                                                                                                                                                                                                                                                                                                                                                                                                                                                                                                                          |                                                                                                                                                                                                                                                                                                                                                                                                                                                                                                                                                                                                                                                                                                                                                                                                                                                                                                                                                                                                                                                                                                                           |                                                                                                                                                                                                                                                                                                                                                                                                                                                                                                                                                                                                     | Sidewalk width                                        | Commonly, a 4 m management can lead a pedestrian to front outside the pedestrianized area. In a simulation study determining which cues, if any, facilitated alignment, the implementation of obstacle lane value perpendicular to the desired walking direction about stopping on crosswalk (Scott et al., 2011). Non-slip markings, visual and audio cues and appropriate crossing time should be provided. It is important to provide that modalities from audible and tactile signals (e.g. rotating cones) to enable safe crossings. Controlled crossings should be prioritized over informal ones, informal crossings should not replace controlled areas. Controlled crossings need to be used at the beginning and end of pedestrian zones and shared spaces. Dropped kerbs and tactile paving should be provided in regular intervals, and particularly near bus stops and key destination points.                                                                                                                                   |         |
|                                                                                                  |                                                                                                                                                                                                                                                                                                                                                                            |                                     |                                                                               |                                                                                                                                                                                                                                                                                                                                                                                                                                                                                                                                                                                                                                                                                                                                                                                                                                                                                                                                                                                                                          |                                                                                                                                                                                                                                                                                                                                                                                                                                                                                                                                                                                                                                                                                                                                                                                                                                                                                                                                                                                                                                                                                                                           |                                                                                                                                                                                                                                                                                                                                                                                                                                                                                                                                                                                                     | Signage                                               | Transport signs and stations are conveniently located, accessible, safe, clean, well-lit and well-maintained with adequate seating and shelter. Complete and accessible information provided to users about routes, schedules and special needs requests. The use of talking signs and emerging technologies as additional supplementary signage, and highlights the priority of providing logical layout with consistent reference signs.                                                                                                                                                                                                                                                                                                                                                                                                                                                                                                                                                                                                    |         |
|                                                                                                  |                                                                                                                                                                                                                                                                                                                                                                            |                                     |                                                                               |                                                                                                                                                                                                                                                                                                                                                                                                                                                                                                                                                                                                                                                                                                                                                                                                                                                                                                                                                                                                                          |                                                                                                                                                                                                                                                                                                                                                                                                                                                                                                                                                                                                                                                                                                                                                                                                                                                                                                                                                                                                                                                                                                                           |                                                                                                                                                                                                                                                                                                                                                                                                                                                                                                                                                                                                     | Signage                                               | For all public routes, a tactile paving treatment is mandatory 0.5m from the edge of the sidewalk, regardless of any pavement, the use of different colors is recommended. Different colors can help guide people with visual impairments.                                                                                                                                                                                                                                                                                                                                                                                                                                                                                                                                                                                                                                                                                                                                                                                                    |         |
|                                                                                                  |                                                                                                                                                                                                                                                                                                                                                                            |                                     |                                                                               |                                                                                                                                                                                                                                                                                                                                                                                                                                                                                                                                                                                                                                                                                                                                                                                                                                                                                                                                                                                                                          |                                                                                                                                                                                                                                                                                                                                                                                                                                                                                                                                                                                                                                                                                                                                                                                                                                                                                                                                                                                                                                                                                                                           |                                                                                                                                                                                                                                                                                                                                                                                                                                                                                                                                                                                                     | Signage                                               | 2.0m wide minimum concrete curb should be created on irregularly shaped surfaces.                                                                                                                                                                                                                                                                                                                                                                                                                                                                                                                                                                                                                                                                                                                                                                                                                                                                                                                                                             |         |
| Street design, sidewalk, curb cut, cross steps, pedestrian crossings, public transportation stop | Lankian, M., Sairkka, T., & Sairkka, L. T. (2011). Improving accessibility information in pedestrian maps and databases. <i>Cartographica</i> , 46(2): 101-108.                                                                                                                                                                                                            | Maastricht, Finland                 | Mobility impaired, visually impaired                                          | To identify the extent to which the content of spatial information meets the requirements of mobility impaired pedestrians, 21 To study what spatial information and map data content is appropriate for different kinds of user groups and their special needs. To collect knowledge about what kinds of geographic information currently exist and what are the information content requirements to enable mobility-impaired users to resolve whether or not they can take a particular route. It to create a set of guidelines for developing geospatial databases in terms of accessibility and Design for All. This research is part of the project Maps, Audio and Visual interfaces for Maps and Location Based Services (MapHubs), which is supported by the European Commission. The MapHubs project aims to develop pedestrian location-based services (LBS) that are also accessible by special user groups, such as elderly and visually impaired people, and that support their use of spatial information. | In order to satisfy the various needs of different users, geospatial databases for pedestrian route planning should also contain detailed information on accessibility, such as pavement surfaces, steep slopes, and stairs. A comprehensive spatial database for pedestrians with special needs would ensure that spatial awareness and help them to orient themselves more easily and to find their way in unfamiliar environments. Pedestrians with mobility restrictions will face obstacles and difficulties while moving around in their everyday lives. In order to increase the potential for mobility-impaired persons to move around, the accessibility aspect of various routes and paths should be integrated with the maximum map services, so that users can get comprehensive information on routes and paths and their characteristics for the better route that they intend to take. With comprehensive route information, users can plan the most suitable route for their current needs and judge for themselves whether they can manage to walk the route alone or whether they will need assistance. | Descriptive study "Researchers scrutinized a wide range of map services, geospatial databases, different kinds of hiking and outdoor route services, city maps, and journey planners. In all, they examined approximately 25 map sites and services, some of them covering broad areas and some of them covering local areas. They also included both maps and map services of general accessible parks and routes in the survey, as well as available guidelines for considering pedestrian accessibility. Map services that do not support pedestrian navigation were not included in the survey. | 23                                                    |                                                                                                                                                                                                                                                                                                                                                                                                                                                                                                                                                                                                                                                                                                                                                                                                                                                                                                                                                                                                                                               |         |
|                                                                                                  |                                                                                                                                                                                                                                                                                                                                                                            |                                     |                                                                               |                                                                                                                                                                                                                                                                                                                                                                                                                                                                                                                                                                                                                                                                                                                                                                                                                                                                                                                                                                                                                          |                                                                                                                                                                                                                                                                                                                                                                                                                                                                                                                                                                                                                                                                                                                                                                                                                                                                                                                                                                                                                                                                                                                           |                                                                                                                                                                                                                                                                                                                                                                                                                                                                                                                                                                                                     | Surface                                               | Surface of the road and tactile paving                                                                                                                                                                                                                                                                                                                                                                                                                                                                                                                                                                                                                                                                                                                                                                                                                                                                                                                                                                                                        |         |
|                                                                                                  |                                                                                                                                                                                                                                                                                                                                                                            |                                     |                                                                               |                                                                                                                                                                                                                                                                                                                                                                                                                                                                                                                                                                                                                                                                                                                                                                                                                                                                                                                                                                                                                          |                                                                                                                                                                                                                                                                                                                                                                                                                                                                                                                                                                                                                                                                                                                                                                                                                                                                                                                                                                                                                                                                                                                           |                                                                                                                                                                                                                                                                                                                                                                                                                                                                                                                                                                                                     | Height                                                | Height profiles of roads, or at least indications where slopes are >5%.                                                                                                                                                                                                                                                                                                                                                                                                                                                                                                                                                                                                                                                                                                                                                                                                                                                                                                                                                                       |         |
|                                                                                                  |                                                                                                                                                                                                                                                                                                                                                                            |                                     |                                                                               |                                                                                                                                                                                                                                                                                                                                                                                                                                                                                                                                                                                                                                                                                                                                                                                                                                                                                                                                                                                                                          |                                                                                                                                                                                                                                                                                                                                                                                                                                                                                                                                                                                                                                                                                                                                                                                                                                                                                                                                                                                                                                                                                                                           |                                                                                                                                                                                                                                                                                                                                                                                                                                                                                                                                                                                                     | Width of walkingways                                  | 2.5m                                                                                                                                                                                                                                                                                                                                                                                                                                                                                                                                                                                                                                                                                                                                                                                                                                                                                                                                                                                                                                          |         |
|                                                                                                  |                                                                                                                                                                                                                                                                                                                                                                            |                                     |                                                                               |                                                                                                                                                                                                                                                                                                                                                                                                                                                                                                                                                                                                                                                                                                                                                                                                                                                                                                                                                                                                                          |                                                                                                                                                                                                                                                                                                                                                                                                                                                                                                                                                                                                                                                                                                                                                                                                                                                                                                                                                                                                                                                                                                                           |                                                                                                                                                                                                                                                                                                                                                                                                                                                                                                                                                                                                     | Color, texture, texture                               | Color, texture, texture                                                                                                                                                                                                                                                                                                                                                                                                                                                                                                                                                                                                                                                                                                                                                                                                                                                                                                                                                                                                                       |         |

Warning surfaces

| TYPE OF ACCESSIBILITY AND DESCRIPTION                                                                                    | REFERENCE | ORIGINITY | TARGETED INDIVIDUALS | AIM / OBJECTIVES / HYPOTHESES                                                                                                                                                                                                                                                                                                                                                                                                                                                                                                                                                                                                                                                                                                                                                                                                                                                                                                                                                                                                                                                                                                                                              | JUSTIFICATION                                                                                                                                                                                                                                                                                                                                                                                                                                                                                                                                                                                                                                                                                                                                | STUDY DESIGN | VARIABLES AND INDICATORS STUDIED                  | SPECIFICATIONS ON THE FEATURES AND INFRASTRUCTURES                                                                                                                                                                                                                                                                                                                                                                                                                                                                                                                                                                                                                                                                                                                                                                                                                                                                                                                                                                                                                                                                                                                                                                                                                                                                                                                                                                                                                                                                                                                                                                                                                                                                                                                                                                                                                                                                                                                                                                                                                                                                                                                                                                                                                                                                                                                                                                                                                                                                                                                                                                                                                                                                                                                                                                                                                                                                                                                                                                                                                                                                                                                                                                                                                                                                                                                                                                                                                                                                                                                                                                                                                                                                                                                                                                                                                                                                                                                                                                                                                                                                                                                                                                                                                                                                                                                                                                                                                                                                                                                                                                                                                                                                                                                                                                                                                                                                                                                                                                                                                                                                                                                                                                                                                                                                                                                                                                                                                                                                                                                                                                                                                                                                                                                                                                                                                                                                                                                                                                                                                                                                                                                                                                                                                                                                                                                                                                                                                                                                                                                                                                                                                                                                                                                                                                                                                                                                                                                                                                                                                                                                                                                                                                                                                                                                                                                                                                                                                                                                                                                                                                                                                                                                                                                                                                                                                                                                                                                                                                                                                                                                                                                                                                                                                                                                                                                                                                                                                                                                                                                                                                                                                                                                                                                                                                                                                                                                                                                                                                                                                                                                                                                                                                                                                                                                                                                                                                                                                                                                                                                                                                                                                                                                                                                                                                                                                                                                                                                                                                                                                                                                                                                                                                                                                                                                                                                                                                                                                                                                                                                                                                                                                                                                                                                                                                                                                                                                                                                                                                                                                                                                                                                                                                                                                                                                                                                                                                                                                                                                                                                                                                                                                                                                                                                                                                                                                                                                                                                                                                                                                                                                                                                                                                                                                                                                                                                                                                                                                                                                                                                                                                                                                                                                                                                                                                                                                                                                                                                                                                                                                                                                                                                                                                                                                                                                                                                                                                                                                                                                                                                                                                                                                                                                                                                                                                                                                                                                                                                                                                                                                                                                                                                                                                                                                                                                                                                                                                                                                                                                                                                                                                                                                                                                                                                                                                                                                                                                                                                                                                                                                                                                                                                                                                                                                                                                                                                                                                                                                                                                                                                                                                                                                                                                                                                                                                                                                                                                                                                                                                                                                                                                                                                                                                                                                                                                                                                                                                                                                                                                                                                                                                                                                                                                                                                                                                                                                                                                                                                                                                                                                                                                                                                                                                                                                                                                                                                                                                                                                                                                                                                                                                                                                                                                                                                                                                                                                                                                                                                                                                                                                                                                                                                                                                                                                                                                                                                                                                                                                                                                                                                                                                                                                                                                                                                                                                                                                                                                                                                                                                                                                                                                                                                                                                                                                                                                                                                                                                                                                                                                                                                                                                                                                                                                                                                                                                                                                                                                                                                                                                                                                                                                                                                                                                                                                                                                                                                                                                                                                                                                                                                                                                                                                                                                                                                                                                                                                                                                                                                                                                                                                                                                                                                                                                                                                                                                                                                                                                                                                                                                                                                                                                                                                                                                                                                                                                                                                                                                                                                                                                                                                                                                                                                                                                                                                                                                                                                                                                                                                                                                                                                                                                                                                                                                                                                                                                                                                                                                                                                                                                                                                                                                                                                                                                                                                                                                                                                                                                                                                                                                                                                                                                                                                                                                                                                                                                                                                                                                                                                                                                                                                                                                                                                                                                                                                                                                                                                                                                                                                                                                                                                                                                                                                                                                                                                                                                                                                                                                                                                                                                                                                                                                                                                                                                                                                                                                                                                                                                                                                                                                                                                                                                                                                                                                                                                                                                                                                                                                                                                                                                                                                                                                                                                                                                                                                                                                                                                                                                                                                                                                                                                                                                                                                                                                                                                                                                                                                                                                                                                                                                                                                                                                                                                                                                                                                                                                                                                                                                                                                                                                                                                                                                                                                                                                                                                                                                                                                                                                                                                                                                                                                                                                                                                                                                                                                                                                                                                                                                                                                                                                                                                                                                                                                                                                                                                                                                                                                                                                                                                                                                                                                                                                                                                                                                                                                                                                                                                                                                                                                                                                                                                                                                                                                                                                                                                                                                                                                                                                                                                                                                                                                                                                                                                                                                                                                                                                                                                                                                                                                                                                                                                                                                                                                                                                                                                                                                                                                                                                                                                                                                                                                                                                                                                                                                                                                                                                                                                                                                                                                                                                                                                                                                                                                                                                                                                                                                                                                                                                                                                                                                                                                                                                                                                                                                                                                                                                                                                                                                                                                                                                                                                                                                                                                                                                                                                                                                                                                                                                                                                                                                                                                                                                                                                                                                                                                                                                                                                                                                                                                                                                                                                                                                                                                                                                                                                                                                                                                                                                                                                                                                                                                                                                                                                                                                                                                                                                                                                                                                                                                                                                                                                                                                                                                                                                                                                                                                                                                                                                                                                                                                                                                                                                                                                                                                                                                                                                                                                                                                                                                                                                                                                                                                                                                                                                                                                                                                                                                                                                                                                                                                                                                                                                                                                                                                                                                                                                                                                                                                                                                                                                                                                                                                                                                                                                                                                                                                                                                                                                                                                                                                                                                                                                                                                                                                                                                                                                                                                                                                                                                                                                                                                                                                                                                                                                                                                                                                                                                                                                                                                                                                                                                                                                                                                                                                                                                                                                                                                                                                                                                                                                                                                                                                                                                                                                                                                                                                                                                                                                                                                                                                                                                                                                                                                                                                                                                                                                                                                                                                                                                                                                                                                                                                                                                                                                                                                                                                                                                                                                                                                                                                                                                                                                                                                                                                                                                                                                                                                                                                                                                                                                                                                                                                                                                                                                                                                                                                                                                                                                                                                                                                                                                                                                                                                                                                                                                                                                                                                                                                                                                                                                                                                                                                                                                                                                                                                                                                                                                                                                                                                                                                                                                                                                                                                                                                                                                                                                                                                                                                                                                                                                                                                                                                                                                                                                                                                                                                                                                                                                                                                                                                                                                                                                                                                                                                                                                                                                                                                                                                                                                                                                                                                                                                                                                                                                                                                                                                                                                                                                                                                                                                                                                                                                                                                                                                                                                                                                                                                                                                                                                                                                                                                                                                                                                                                                                                                                                                                                                                                                                                                                                                                                                                                                                                                                                                                                                                                                                                                                                                                                                                                                                                                                                                                                                                                                                                                                                                                                                                                                                                                                                                                                                                                                                                                                                                                                                                                                                                                                                                                                                                                                                                                                                                                                                                                                                                                                                                                                                                                                                                                                                                                                                                                                                                                                                                                                                                                                                                                                                                                                                                                                                                                                                                                                                                                                                                                                                                                                                                                                                                                                                                                                                                                                                                                                                                                                                                                                                                                                                                                                                                                                                                                                                                                                                                                                                                                                                                                                                                                                                                                                                                                                                                                                                                                                                                                                                                                                                                                                                                                                                                                                                                                                                                                                                                                                                                                                                                                                                                                                                                                                                                                                                                                                                                                                                                                                                                                                                                                                                                                                                                                                                                                                                                                                                                                                                                                                                                                                                                                                                                                                                                                                                                                                                                                                                                                                                                                                                                                                                                                                                                                                                                                                                                                                                                                                                                                                                                                                                                                                                                                                                                                                                                                                                                                                                                                                                                                                                                                                                                                                                                                                                                                                                                                                                                                                                                                                                                                                                                                                                                                                                                                                                                                                                                                                                                                                                                                                                                                                                                                                                                                                                                                                                                                                                                                                                                                                                                                                                                                                                                                                                                                                                                                                                                                                                                                                                                                                                                                                                                                                                                                                                                                                                                                                                                                                                                                                                                                                                                                                                                                                                                                                                                                                                                                                                                                                                                                                                                                                                                                                                                                                                                                                                                                                                                                                                                                                                                                                                                                                                                                                                                                                                                                                                                                                                                                                                                                                                                                                                                                                                                                                                                                                                                                                                                                                                                                                                                                                                                                                                                                                                                                                                                                                                                                                                                                                                                                                                                                                                                                                                                                                                                                                                                                                                                                                                                                                                                                                                                                                                                                                                                                                                                                                                                                                                                                                                                                                                                                                                                                                                                                                                                                                                                                                                                                                                                                                                                                                                                                                                                                                                                                                                                                                                                                                                                                                                                                                                                                                                                                                                                                                                                                                                                                                                                                                                                                                                                                                                                                                                                                                                                                                                                                                                                                                                                                                                                                                                                                                                                                                                                                                                                                                                                                                                                                                                                                                                                                                                                                                                                                                                                                                                                                                                                                                                                                                                                                                                                                                                                                                                                                                                                                                                                                                                                                                                                                                                                                                                                                                                                                                                                                                                                                                                                                                                                                                                                                                                                                                                                                                                                                                                                                                                                                                                                                                                                                                                                                                                                                                                                                                                                                                                                                                                                                                                                                                                                                                                                                                                                                                                                                                                                                                                                                                                                                                                                                                                                                                                                                                                                                                                                                                                                                                                                                                                                                                                                                                                                                                                                                                                                                                                                                                                                                                                                                                                                                                                                                                                                                                                                                                                                                                                                                                                                                                                                                                                                                                                                                                                                                                                                                                                                                                                                                                                                                                                                                                                                                                                                                                                                                                                                                                                                                                                                                                                                                                                                                                                                                                                                                                                                                                                                                                                                                                                                                                                                                                                                                                                                                                                                                                                                                                                                                                                                                                                                                                                                                                                                                                                                                                                                                                                                                                                                                                                                                                                                                                                                                                                                                                                                                                                                                                                                                                                                                                                                                                                                                                                                                                                                                                                                                                                                                                                                                                                                                                                                                                                                                                                                                                                                                                                                                               | QUALITY |
|--------------------------------------------------------------------------------------------------------------------------|-----------|-----------|----------------------|----------------------------------------------------------------------------------------------------------------------------------------------------------------------------------------------------------------------------------------------------------------------------------------------------------------------------------------------------------------------------------------------------------------------------------------------------------------------------------------------------------------------------------------------------------------------------------------------------------------------------------------------------------------------------------------------------------------------------------------------------------------------------------------------------------------------------------------------------------------------------------------------------------------------------------------------------------------------------------------------------------------------------------------------------------------------------------------------------------------------------------------------------------------------------|----------------------------------------------------------------------------------------------------------------------------------------------------------------------------------------------------------------------------------------------------------------------------------------------------------------------------------------------------------------------------------------------------------------------------------------------------------------------------------------------------------------------------------------------------------------------------------------------------------------------------------------------------------------------------------------------------------------------------------------------|--------------|---------------------------------------------------|--------------------------------------------------------------------------------------------------------------------------------------------------------------------------------------------------------------------------------------------------------------------------------------------------------------------------------------------------------------------------------------------------------------------------------------------------------------------------------------------------------------------------------------------------------------------------------------------------------------------------------------------------------------------------------------------------------------------------------------------------------------------------------------------------------------------------------------------------------------------------------------------------------------------------------------------------------------------------------------------------------------------------------------------------------------------------------------------------------------------------------------------------------------------------------------------------------------------------------------------------------------------------------------------------------------------------------------------------------------------------------------------------------------------------------------------------------------------------------------------------------------------------------------------------------------------------------------------------------------------------------------------------------------------------------------------------------------------------------------------------------------------------------------------------------------------------------------------------------------------------------------------------------------------------------------------------------------------------------------------------------------------------------------------------------------------------------------------------------------------------------------------------------------------------------------------------------------------------------------------------------------------------------------------------------------------------------------------------------------------------------------------------------------------------------------------------------------------------------------------------------------------------------------------------------------------------------------------------------------------------------------------------------------------------------------------------------------------------------------------------------------------------------------------------------------------------------------------------------------------------------------------------------------------------------------------------------------------------------------------------------------------------------------------------------------------------------------------------------------------------------------------------------------------------------------------------------------------------------------------------------------------------------------------------------------------------------------------------------------------------------------------------------------------------------------------------------------------------------------------------------------------------------------------------------------------------------------------------------------------------------------------------------------------------------------------------------------------------------------------------------------------------------------------------------------------------------------------------------------------------------------------------------------------------------------------------------------------------------------------------------------------------------------------------------------------------------------------------------------------------------------------------------------------------------------------------------------------------------------------------------------------------------------------------------------------------------------------------------------------------------------------------------------------------------------------------------------------------------------------------------------------------------------------------------------------------------------------------------------------------------------------------------------------------------------------------------------------------------------------------------------------------------------------------------------------------------------------------------------------------------------------------------------------------------------------------------------------------------------------------------------------------------------------------------------------------------------------------------------------------------------------------------------------------------------------------------------------------------------------------------------------------------------------------------------------------------------------------------------------------------------------------------------------------------------------------------------------------------------------------------------------------------------------------------------------------------------------------------------------------------------------------------------------------------------------------------------------------------------------------------------------------------------------------------------------------------------------------------------------------------------------------------------------------------------------------------------------------------------------------------------------------------------------------------------------------------------------------------------------------------------------------------------------------------------------------------------------------------------------------------------------------------------------------------------------------------------------------------------------------------------------------------------------------------------------------------------------------------------------------------------------------------------------------------------------------------------------------------------------------------------------------------------------------------------------------------------------------------------------------------------------------------------------------------------------------------------------------------------------------------------------------------------------------------------------------------------------------------------------------------------------------------------------------------------------------------------------------------------------------------------------------------------------------------------------------------------------------------------------------------------------------------------------------------------------------------------------------------------------------------------------------------------------------------------------------------------------------------------------------------------------------------------------------------------------------------------------------------------------------------------------------------------------------------------------------------------------------------------------------------------------------------------------------------------------------------------------------------------------------------------------------------------------------------------------------------------------------------------------------------------------------------------------------------------------------------------------------------------------------------------------------------------------------------------------------------------------------------------------------------------------------------------------------------------------------------------------------------------------------------------------------------------------------------------------------------------------------------------------------------------------------------------------------------------------------------------------------------------------------------------------------------------------------------------------------------------------------------------------------------------------------------------------------------------------------------------------------------------------------------------------------------------------------------------------------------------------------------------------------------------------------------------------------------------------------------------------------------------------------------------------------------------------------------------------------------------------------------------------------------------------------------------------------------------------------------------------------------------------------------------------------------------------------------------------------------------------------------------------------------------------------------------------------------------------------------------------------------------------------------------------------------------------------------------------------------------------------------------------------------------------------------------------------------------------------------------------------------------------------------------------------------------------------------------------------------------------------------------------------------------------------------------------------------------------------------------------------------------------------------------------------------------------------------------------------------------------------------------------------------------------------------------------------------------------------------------------------------------------------------------------------------------------------------------------------------------------------------------------------------------------------------------------------------------------------------------------------------------------------------------------------------------------------------------------------------------------------------------------------------------------------------------------------------------------------------------------------------------------------------------------------------------------------------------------------------------------------------------------------------------------------------------------------------------------------------------------------------------------------------------------------------------------------------------------------------------------------------------------------------------------------------------------------------------------------------------------------------------------------------------------------------------------------------------------------------------------------------------------------------------------------------------------------------------------------------------------------------------------------------------------------------------------------------------------------------------------------------------------------------------------------------------------------------------------------------------------------------------------------------------------------------------------------------------------------------------------------------------------------------------------------------------------------------------------------------------------------------------------------------------------------------------------------------------------------------------------------------------------------------------------------------------------------------------------------------------------------------------------------------------------------------------------------------------------------------------------------------------------------------------------------------------------------------------------------------------------------------------------------------------------------------------------------------------------------------------------------------------------------------------------------------------------------------------------------------------------------------------------------------------------------------------------------------------------------------------------------------------------------------------------------------------------------------------------------------------------------------------------------------------------------------------------------------------------------------------------------------------------------------------------------------------------------------------------------------------------------------------------------------------------------------------------------------------------------------------------------------------------------------------------------------------------------------------------------------------------------------------------------------------------------------------------------------------------------------------------------------------------------------------------------------------------------------------------------------------------------------------------------------------------------------------------------------------------------------------------------------------------------------------------------------------------------------------------------------------------------------------------------------------------------------------------------------------------------------------------------------------------------------------------------------------------------------------------------------------------------------------------------------------------------------------------------------------------------------------------------------------------------------------------------------------------------------------------------------------------------------------------------------------------------------------------------------------------------------------------------------------------------------------------------------------------------------------------------------------------------------------------------------------------------------------------------------------------------------------------------------------------------------------------------------------------------------------------------------------------------------------------------------------------------------------------------------------------------------------------------------------------------------------------------------------------------------------------------------------------------------------------------------------------------------------------------------------------------------------------------------------------------------------------------------------------------------------------------------------------------------------------------------------------------------------------------------------------------------------------------------------------------------------------------------------------------------------------------------------------------------------------------------------------------------------------------------------------------------------------------------------------------------------------------------------------------------------------------------------------------------------------------------------------------------------------------------------------------------------------------------------------------------------------------------------------------------------------------------------------------------------------------------------------------------------------------------------------------------------------------------------------------------------------------------------------------------------------------------------------------------------------------------------------------------------------------------------------------------------------------------------------------------------------------------------------------------------------------------------------------------------------------------------------------------------------------------------------------------------------------------------------------------------------------------------------------------------------------------------------------------------------------------------------------------------------------------------------------------------------------------------------------------------------------------------------------------------------------------------------------------------------------------------------------------------------------------------------------------------------------------------------------------------------------------------------------------------------------------------------------------------------------------------------------------------------------------------------------------------------------------------------------------------------------------------------------------------------------------------------------------------------------------------------------------------------------------------------------------------------------------------------------------------------------------------------------------------------------------------------------------------------------------------------------------------------------------------------------------------------------------------------------------------------------------------------------------------------------------------------------------------------------------------------------------------------------------------------------------------------------------------------------------------------------------------------------------------------------------------------------------------------------------------------------------------------------------------------------------------------------------------------------------------------------------------------------------------------------------------------------------------------------------------------------------------------------------------------------------------------------------------------------------------------------------------------------------------------------------------------------------------------------------------------------------------------------------------------------------------------------------------------------------------------------------------------------------------------------------------------------------------------------------------------------------------------------------------------------------------------------------------------------------------------------------------------------------------------------------------------------------------------------------------------------------------------------------------------------------------------------------------------------------------------------------------------------------------------------------------------------------------------------------------------------------------------------------------------------------------------------------------------------------------------------------------------------------------------------------------------------------------------------------------------------------------------------------------------------------------------------------------------------------------------------------------------------------------------------------------------------------------------------------------------------------------------------------------------------------------------------------------------------------------------------------------------------------------------------------------------------------------------------------------------------------------------------------------------------------------------------------------------------------------------------------------------------------------------------------------------------------------------------------------------------------------------------------------------------------------------------------------------------------------------------------------------------------------------------------------------------------------------------------------------------------------------------------------------------------------------------------------------------------------------------------------------------------------------------------------------------------------------------------------------------------------------------------------------------------------------------------------------------------------------------------------------------------------------------------------------------------------------------------------------------------------------------------------------------------------------------------------------------------------------------------------------------------------------------------------------------------------------------------------------------------------------------------------------------------------------------------------------------------------------------------------------------------------------------------------------------------------------------------------------------------------------------------------------------------------------------------------------------------------------------------------------------------------------------------------------------------------------------------------------------------------------------------------------------------------------------------------------------------------------------------------------------------------------------------------------------------------------------------------------------------------------------------------------------------------------------------------------------------------------------------------------------------------------------------------------------------------------------------------------------------------------------------------------------------------------------------------------------------------------------------------------------------------------------------------------------------------------------------------------------------------------------------------------------------------------------------------------------------------------------------------------------------------------------------------------------------------------------------------------------------------------------------------------------------------------------------------------------------------------------------------------------------------------------------------------------------------------------------------------------------------------------------------------------------------------------------------------------------------------------------------------------------------------------------------------------------------------------------------------------------------------------------------------------------------------------------------------------------------------------------------------------------------------------------------------------------------------------------------------------------------------------------------------------------------------------------------------------------------------------------------------------------------------------------------------------------------------------------------------------------------------------------------------------------------------------------------------------------------------------------------------------------------------------------------------------------------------------------------------------------------------------------------------------------------------------------------------------------------------------------------------------------------------------------------------------------------------------------------------------------------------------------------------------------------------------------------------------------------------------------------------------------------------------------------------------------------------------------------------------------------------------------------------------------------------------------------------------------------------------------------------------------------------------------------------------------------------------------------------------------------------------------------------------------------------------------------------------------------------------------------------------------------------------------------------------------------------------------------------------------------------------------------------------------------------------------------------------------------------------------------------------------------------------------------------------------------------------------------------------------------------------------------------------------------------------------------------------------------------------------------------------------------------------------------------------------------------------------------------------------------------------------------------------------------------------------------------------------------------------------------------------------------------------------------------------------------------------------------------------------------------------------------------------------------------------------------------------------------------------------------------------------------------------------------------------------------------------------------------------------------------------------------------------------------------------------------------------------------------------------------------------------------------------------------------------------------------------------------------------------------------------------------------------------------------------------------------------------------------------------------------------------------------------------------------------------------------------------------------------------------------------------------------------------------------------------------------------------------------------------------------------------------------------------------------------------------------------------------------------------------------------------------------------------------------------------------------------------------------------------------------------------------------------------------------------------------------------------------------------------------------------------------------------------------------------------------------------------------------------------------------------------------------------------------------------------------------------------------------------------------------------------------------------------------------------------------------------------------------------------------------------------------------------------------------------------------------------------------------------------------------------------------------------------------------------------------------------------------------------------------------------------------------------------------------------------------------------------------------------------------------------------------------------------------------------------------------------------------------------------------------------------------------------------------------------------------------------------------------------------------------------------------------------------------------------------------------------------------------------------------------------------------------------------------------------------------------------------------------------------------------------------------------------------------------------------------------------------------------------------------------------------------------------------------------------------------------------------------------------------------------------------------------------------------------------------------------------------------------------------------------------------------------------------------------------------------------------------------------------------------------------------------------------------------------------------------------------------------------------------------------------------------------------------------------------------------------------------------------------------------------------------------------------------------------------------------------------------------------------------------------------------------------------------------------------------------------------------------------------------------------------------------------------------------------------------------------------------------------------------------------------------------------------------------------------------------------------------------------------------------------------------------------------------------------------------------------------------------------------------------------------------------------------------------------------------------------------------------------------------------------------------------------------------------------------------------------------------------------------------------------------------------------------------------------------------------------------------------------------------------------------------------------------------------------------------------------------------------------------------------------------------------------------------------------------------------------------------------------------------------------------------------------------------------------------------------------------------------------------------------------------------------------------------------------------------------------------------------------------------------------------------------------------------------------------------------------------------------------------------------------------------------------------------------------------------------------------------------------------------------------------------------------------------------------------------------------------------------------------------------------------------------------------------------------------------------------------------------------------------------------------------------------------------------------------------------------------------------------------------------------------------------------------------------------------------------------------------------------------------------------------------------------------------------------------------------------------------------------------------------------------------------------------------------------------------------------------------------------------------------------------------------------------------------------------------------------------------------------------------------------------------------------------------------------------------------------------------------------------------------------------------------------------------------------------------------------------------------------------------------------------------------------------------------------------------------------------------------------------------------------------------------------------------------------------------------------------------------------------------------------------------------------------------------------------------------------------------------------------------------------------------------------------------------------------------------------------------------------------------------------------------------------------------------------------------------------------------------------------------------------------------------------------------------------------------------------------------------------------------------------------------------------------------------------------------------------------------------------------------------------------------------------------------------------------------------------------------------------------------------------------------------------------------------------------------------------------------------------------------------------------------------------------------------------------------------------------------------------------------------------------------------------------------------------------------------------------------------------------------------------------------------------------------------------------------------------------------------------------------------------------------------------------------------------------------------------------------------------------------------------------------------------------------------------------------------------------------------------------------------------------------------------------------------------------------------------------------------------------------------------------------------------------------------------------------------------------------------------------------------------------------------------------------------------------------------------------------------------------------------------------------------------------------------------------------------------------------------------------------------------------------------------------------------------------------------------------------------------------------------------------------------------------------------------------------------------------------------------------------------------------------------------------------------------------------------------------------------------------------------------------------------------------------------------------------------------------------------------------------------------------------------------------------------------------------------------------------------------------------------------------------------------------------------------------------------------------------------------------------------------------------------------------------------------------------------------------------------------------------------------------------------------------------------------------------------------------------------------------------------------------------------------------------------------------------------------------------------------------------------------------------------------------------------------------------------------------------------------------------------------------------------------------------------------------------------------------------------------------------------------------------------------------------------------------------------------------------------------------------------------------------------------------------------------------------------------------------------------------------------------------------------------------------------------------------------------------------------------------------------------------------------------------------------------------------------------------------------------------------------------------------------------------------------------------------------------------------------------------------------------------------------------------------------------------------------------------------------------------------------------------------------------------------------------------------------------------------------------------------------------------------------------------------------------------------------------------------------------------------------------------------------------------------------------------------------------------------------------------------------------------------------------------------------------------------------------------------------------------------------------------------------------------------------------------------------------------------------------------------------------------------------------------------------------------------------------------------------------------------------------------------------------------------------------------------------------------------------------------------------------------------------------------------------------------------------------------------------------------------------------------------------------------------------------------------------------------------------------------------------------------------------------------------------------------------------------------------------------------------------------------------------------------------------------------------------------------------------------------------------------------------------------------------------------------------------------------------------------------------------------------------------------------------------------------------------------------------------------------------------------------------------------------------------------------------------------------------------------------------------------------------------------------------------------------------------------------------------------------------------------------------------------------------------------------------------------------------------------------------------------------------------------------------------------------------------------------------------------------------------------------------------------------------------------------------------------------------------------------------------------------------------------------------------------------------------------------------------------------------------------------------------------------------------------------------------------------------------------------------------------------------------------------------------------------------------------------------------------------------------------------------------------------------------------------------------------------------------------------------------------------------------------------------------------------------------------------------------------------------------------------------------------------------------------------------------------------------------------------------------------------------------------------------------------------------------------------------------------------------------------------------------------------------------------------------------------------------------------------------------------------------------------------------------------------------------------------------------------------------------------------------------------------------------------------------------------------------------------------------------------------------------------------------------------------------------------------------------------------------------------------------------------------------------------------------------------------------------------------------------------------------------------------------------------------------------------------------------------------------------------------------------------------------------------------------------------------------------------------------------------------------------------------------------------------------------------------------------------------------------------------------------------------------------------------------------------------------------------------------------------------------------------------------------------------------------------------------------------------------------------------------------------------------------------------------------------------------------------------------------------------------------------------------------------------------------------------------------------------------------------------------------------------------------------------------------------------------------------------------------------------------------------------------------------------------------------------------------------------------------------------------------------------------------------------------------------------------------------------------------------------------------------------------------------------------------------------------------------------------------------------------------------------------------------------------------------------------------------------------------------------------------------------------------------------------------------------------------------------------------------------------------------------------------------------------------------------------------------------------------------------------------------------------------------------------------------------------------------------------------------------------------------------------------------------------------------------------------------------------------------------------------------------------------------------------------------------------------------------------------------------------------------------------------------------------------------------------------------------------------------------------------------------------------------------------------------------------------------------------------------------------------------------------------------------------------------------------------------------------------------------------------------------------------------------------------------------------------------------------------------------------------------------------------------------------------------------------------------------------------------------------------------------------------------------------------------------------------------------------------------------------------------------------------------------------------------------------------------------------------------------------------------------------------------------------------------------------------------------------------------------------------------------------------------------------------------------------------------------------------------------------------------------------------------------------------------------------------------------------------------------------------------------------------------------------------------------------------------------------------------------------------------------------------------------------------------------------------------------------------------------------------------------------------------------------------------------------------------------------------------------------------------------------------------------------------------------------------------------------------------------------------------------------------------------------------------------------------------------------------------------------------------------------------------------------------------------------------------------------------------------------------------------------------------------------------------------------------------------------------------------------------------------------------------------------------------------------------------------------------------------------------------------------------------------------------------------------------------------------------------------------------------------------------------------------------------------------------------------------------------------------------------------------------------------------------------------------------------------------------------------------------------------------------------------------------------------------------------------------------------------------------------------------------------------------------------------------------------------------------------------------------------------------------------------------------------------------------------------------------------------------------------------------------------------------------------------------------------------------------------------------------------------------------------------------------------------------------------------------------------------------------------------------------------------------------------------------------------------------------------------------------------------------------------------------------------------------------------------------------------------------------------------------------------------------------------------------------------------------------------------------------------------------------------------------------------------------------------------------------------------------------------------------------------------------------------------------------------------------------------------------------------------------------------------------------------------------------------------------------------------------------------------------------------------------------------------------------------------------------------------------------------------------------------------------------------------------------------------------------------------------------------------------------------------------------------------------------------------------------------------------------------------------------------------------------------------------------------------------------------------------------------------------------------------------------------------------------------------------------------------------------------------------------------------------------------------------------------------------------------------------------------------------------------------------------------------------------------------------------------------------------------------------------------------------------------------------------------------------------------------------------------------------------------------------------------------------------------------------------------------------------------------------------------------------------------------------------------------------------------------------------------------------------------------------------------------------------------------------------------------------------------------------------------------------------------------------------------------------------------------------------------------------------------------------------------------------------------------------------------------------------------------------------------------------------------------------------------------------------------------------------------------------------------------------------------------------------------------------------------------------------------------------------------------------------------------------------------------------------------------------------------------------------------------------------------------------------------------------------------------------------------------------------------------------------------------------------------------------------------------------------------------------------------------------------------------------------------------------------------------------------------------------------------------------------------------------------------------------------------------------------------------------------------------------------------------------------------------------------------------------------------------------------------------------------------------------------------------------------------------------------------------------------------------------------------------------------------------------------------------------------------------------------------------------------------------------------------------------------------------------------------------------------------------------------------------------------------------------------------------------------------------------------------------------------------------------------------------------------------------------------------------------------------------------------------------------------------------------------------------------------------------------------------------------------------------------------------------------------------------------------------------------------------------------------------------------------------------------------------------------------------------------------------------------------------------------------------------------------------------------------------------------------------------------------------------------------------------------------------------------------------------------------------------------------------------------------------------------------------------------------------------------------------------------------------------------------------------------------------------------------------------------------------------------------------------------------------------------------------------------------------------------------------------------------------------------------------------------------------------------------------------------------------------------------------------------------------------------------------------------------------------------------------------------------------------------------------------------------------------------------------------------------------------------------------------------------------------------------------------------------------------------------------------------------------------------------------------------------------------------------------------------------------------------------------------------------------------------------------------------------------------------------------------------------------------------------------------------------------------------------------------------------------------------------------------------------------------------------------------------------------------------------------------------------------------------------------------------------------------------------------------------------------------------------------------------------------------------------------------------------------------------------------------------------------------------------------------------------------------------------------------------------------------------------------------------------------------------------------------------------------------------------------------------------------------------------------------------------------------------------------------------------------------------------------------------------------------------------------------------------------------------------------------------------------------------------------------------------------------------------------------------------------------------------------------------------------------------------------------------------------------------------------------------------------------------------------------------------------------------------------------------------------------------------------------------------------------------------------------------------------------------------------------------------------------------------------------------------------------------------------------------------------------------------------------------------------------------------------------------------------------------------------------------------------------------------------------------------------------------------------------------------------------------------------------------------------------------------------------------------------------------------------------------------------------------------------------------------------------------------------------------------------------------------------------------------------------------------------------------------------------------------------------------------------------------------------------------------------------------------------------------------------------------------------------------------------------------------------------------------------------------------------------------------------------------------------------------------------------------------------------------------------------------------------------------------------------------------------------------------------------------------------------------------------------------------------------------------------------------------------------------------------------------------------------------------------------------------------------------------------------------------------------------------------------------------------------------------------------------------------------------------------------------------------------------------------------------------------------------------------------------------------------------------------------------------------------------------------------------------------------------------------------------------------------------------------------------------------------------------------------------------------------------------------------------------------------------------------------------------------------------------------------------------------------------------------------------------------------------------------------------------------------------------------------------------------------------------------------------------------------------------------------------------------------------------------------------------------------------------------------------------------------------------------------------------------------------------------------------------------------------------------------------------------------------------------------------------------------------------------------------------------------------------------------------------------------------------------------------------------------------------------------------------------------------------------------------------------------------------------------------------------------------------------------------------------------------------------------------------------------------------------------------------------------------------------------------------------------------------------------------------------------------------------------------------------------------------------------------------------------------------------------------------------------------------------------------------------------------------------------------------------------------------------------------------------------------------------------------------------------------------------------------------------------------------------------------------------------------------------------------------------------------------------------------------------------------------------------------------------------------------------------------------------------------------------------------------------------------------------------------------------------------------------------------------------------------------------------------------------------------------------------------------------------------------------------------------------------------------------------------------------------------------------------------------------------------------------------------------------------------------------------------------------------------------------------------------------------------------------------------------------------------------------------------------------------------------------------------------------------------------------------------------------------------------------------------------------------------------------------------------------------------------------------------------------------------------------------------------------------------------------------------------------------------------------------------------------------------------------------------------------------------------------------------------------------------------------------------------------------------------------------------------------------------------------------------------------------------------------------------------------------------------------------------------------------------------------------------------------------------------------------------------------------------------------------------------------------------------------------------------------------------------------------------------------------------------------------------------------------------------------------------------------------------------------------------------------------------------------------------------------------------------------------------------------------------------------------------------------------------------------------------------------------------------------------------------------------------------------------------------------------------------------------------------------------------------------------------------------------------------------------------------------------------------------------------------------------------------------------------------------------------------------------------------------------------------------------------------------------------------------------------------------------------------------------------------------------------------------------------------------------------------------------------------------------------------------------------------------------------------------------------------------------------------------------------------------------------------------------------------------------------------------------------------------------------------------------------------------------------------------------------------------------------------------------------------------------------------------------------------------------------------------------------------------------------------------------------------------------------------------------------------------------------------------------------------------------------------------------------------------------------------------------------------------------------------------------------------------------------------------------------------------------------------------------------------------------------------------------------------------------------------------------------------------------------------------------------------------------------------------------------------------------------------------------------------------------------------------------------------------------------------------------------------------------------------------------------------------------------------------------------------------------------------------------------------------------------------------------------------------------------------------------------------------------------------------------------------------------------------------------------------------------------------------------------------------------------------------------------------------------------------------------------------------------------------------------------------------------------------------------------------------------------------------------------------------------------------------------------------------------------------------------------------------------------------------------------------------------------------------------------------------------------------------------------------------------------------------------------------------------------------------------------------------------------------------------------------------------------------------------------------------------------------------------------------------------------------------------------------------------------------------------------------------------------------------------------------------------------------------------------------------------------------------------------------------------------------------------------------------------------------------------------------------------------------------------------------------------------------------------------------------------------------------------------------------------------------------------------------------------------------------------------------------------------------------------------------------------------------------------------------------------------------------------------------------------------------------------------------------------------------------------------------------------------------------------------------------------------------------------------------------------------------------------------------------------------------------------------------------------------------------------------------------------------------------------------------------------------------------------------------------------------------------------------------------------------------------------------------------------------------------------------------------------------------------------------------------------------------------------------------------------------------------------------------------------------------------------------------------------------------------------------------------------------------------------------------------------------------------------------------------------------------------------------------------------------------------------------------------------------------------------------------------------------------------------------------------------------------------------------------------------------------------------------------------------------------------------------------------------------------------------------------------------------------------------------------------------------------------------------------------------------------------------------------------------------------------------------------------------------------------------------------------------------------------------------------------------------------------------------------------------------------------------------------------------------------------------------------------------------------------------------------------------------------------------------------------------------------------------------------------------------------------------------------------------------------------------------------------------------------------------------------------------------------------------------------------------------------------------------------------------------------------------------------------------------------------------------------------------------------------------------------------------------------------------------------------------------------------------------------------------------------------------------------------------------------------------------------------------------------------------------------------------------------------------------------------------------------------------------------------------------------------------------------------------------------------------------------------------------------------------------------------------------------------------------------------------------------------------------------------------------------------------------------------------------------------------------------------------------------------------------------------------------------------------------------------------------------------------------------------------------------------------------------------------------------------------------------------------------------------------------------------------------------------------------------------------------------------------------------------------------------------------------------------------------------------------------------------------------------------------------------------------------------------------------------------------------------------------------------------------------------------------------------------------------------------------------------------------------------------------------------------------------------------------------------------------------------------------------------------------------------------------------------------------------------------------------------------------------------------------------------------------------------------------------------------------------------------------------------------------------------------------------------------------------------------------------------------------------------------------------------------------------------------------------------------------------------------------------------------------------------------------------------------------------------------------------------------------------------------------------------------------------------------------------------------------------------------------------------------------------------------------------------------------------------------------------------------------------------------------------------------------------------------------------------------------------------------------------------------------------------------------------------------------------------------------------------------------------------------------------------------------------------------------------------------------------------------------------------------------------------------------------------------------------------------------------------------------------------------------------------------------------------------------------------------------------------------------------------------------------------------------------------------------------------------------------------------------------------------------------------------------------------------------------------------------------------------------------------------------------------------------------------------------------------------------------------------------------------------------------------------------------------------------------------------------------------------------------------------------------------------------------------------------|---------|
| Sharp, S. & Savill, T. (1998). The pedestrian environment – user needs or target the blind and partially sighted people? |           |           |                      | when rising around the pedestrian environment, visually impaired people will actively seek and make use of changes in footway surfaces. Tactile paving surfaces can therefore be used to convey important information to visually impaired pedestrians about their immediate environment. They may have raised edges or may be made of materials which will differ from the surrounding footway surface. The United Kingdom has been carrying out research into tactile surfaces since the early 1980s. The research has aimed to identify tactile surfaces that are: 1) readily identifiable both underfoot and with a cane by the majority of visually impaired people; 2) distinguishable from each other and from other paving surfaces; 3) capable of being learned and remembered; Recognising that the needs of people with physical and sensory disabilities could create potential conflicts, the research that led to the development of the tactile paving surfaces involved not only the target group, i.e. visually impaired people, but also others with a wide range of other disabilities including wheelchair users and people with walking difficulties. | There are approximately one million blind and partially sighted adults in the United Kingdom. Approximately 10% of these live in the north. Walking is a vital mode of transport for visually impaired people either on their own or in combination with the use of public transport. It is many either need or want to make journeys for work or their own. Those who walk around on their own may do so by using their residual sight or by using a mobility aid. In a survey half of the people stated that they had gone on the last week and half of them did not (Stevens et al., 1985). However, many of those interviewed did not not confident in their ability to walk alone other in their immediate neighbourhood or outside it. |              | Capacity to be detected underfoot and with a cane | <p><b>Blister surface.</b> It is used where the blisters is dropped, to inform visually impaired pedestrians that they are about to step off the footway into the carriageway. At light controlled crossings, these are called "Puddles" in the UK, the surface is installed in an "L" shape so that people can walk down the stem of the "L". The L-shape is positioned control lines from where they can see a push button to request the walk phase. An "L" shape is also used at "Crossed" crossings where drivers are required to give way to pedestrians to allow them to walk across the carriageway. At other crossings are considered to be uncontrolled crossings, i.e. pedestrian does not have to yield over vehicles and must make a decision about whether to cross. The Blister surface is installed across the full depth of the dropped kerb and to a depth of 400mm. As this type of crossing, the surface is normally foot traffic. Tactile crossing measures are now widespread in the UK and some schemes install sections of the carriageway being raised to the height of the footway so as to create speed reducing kerbs to help blind people cross the road. This can cause problems for visually impaired people who would normally rely on the presence of the kerb to signal and it is recommended that the blister surface is also installed in situations where there is no level difference between the carriageway and the footway.</p> <p><b>Height warning surface.</b> It was developed to convey the message "hazard, proceed with care". It is most commonly used to indicate steps where it extends across the full width of the stairs and the last step slightly from the first step, at both the top and bottom of the steps. The same surface is now used to indicate to visually impaired people that they are walking onto an on-street light rapid transit area.</p> <p><b>Pedestrian Edge (Off-Street) Warning Surface.</b> Visually impaired people cannot see difficult to know the edge of a platform or train stations, particularly where they do not have the help of a white cane. It was developed to help people who cannot see while the white line running down the platform edge. The surface is installed across the length of the platform, but back slightly to give the person time to see warning before walking the platform edge.</p> <p><b>Platform Edge (On-Street) Warning Surface.</b> Light raised kerbs (LRT) is given in 100mm with tactile surface along the platform edge. The surface is raised to create a platform from which people can board the train. This surface was developed to be along the platform, but back slightly. It was developed because of the risk that the blister edge platform edge (off-street) warning surface could be confused with the blister surface with the latter surface is intended to indicate the presence of a hazard.</p> <p><b>Segregated shared cycle/tactile/surface.</b> On a segregated shared cycle/tactile/surface, the surface is divided in 3 with cycles riding on one side of the facility and pedestrians walking along the other. A white line is painted along the length of the facility and a painted type of a bicycle is used, together with a sign, to inform users of the facility. The tactile surface is used to indicate the boundary between the two facilities. The tactile surface is used to help people who are entering such a facility, not know on which side they are walking. The segregated shared cycle/tactile/surface surface was developed to provide visually impaired people with tactile information to help them that they are entering the facility and to help them distinguish between the pedestrian and cycle facility. The tactile surface is used to indicate the boundary between the two facilities. The tactile surface is used to help people who are entering such a facility, not know on which side they are walking. The segregated shared cycle/tactile/surface surface was developed to provide visually impaired people with tactile information to help them that they are entering the facility and to help them distinguish between the pedestrian and cycle facility. The tactile surface is used to indicate the boundary between the two facilities. The tactile surface is used to help people who are entering such a facility, not know on which side they are walking. The segregated shared cycle/tactile/surface surface was developed to provide visually impaired people with tactile information to help them that they are entering the facility and to help them distinguish between the pedestrian and cycle facility. The tactile surface is used to indicate the boundary between the two facilities. The tactile surface is used to help people who are entering such a facility, not know on which side they are walking. The segregated shared cycle/tactile/surface surface was developed to provide visually impaired people with tactile information to help them that they are entering the facility and to help them distinguish between the pedestrian and cycle facility. The tactile surface is used to indicate the boundary between the two facilities. The tactile surface is used to help people who are entering such a facility, not know on which side they are walking. The segregated shared cycle/tactile/surface surface was developed to provide visually impaired people with tactile information to help them that they are entering the facility and to help them distinguish between the pedestrian and cycle facility. The tactile surface is used to indicate the boundary between the two facilities. The tactile surface is used to help people who are entering such a facility, not know on which side they are walking. The segregated shared cycle/tactile/surface surface was developed to provide visually impaired people with tactile information to help them that they are entering the facility and to help them distinguish between the pedestrian and cycle facility. The tactile surface is used to indicate the boundary between the two facilities. The tactile surface is used to help people who are entering such a facility, not know on which side they are walking. The segregated shared cycle/tactile/surface surface was developed to provide visually impaired people with tactile information to help them that they are entering the facility and to help them distinguish between the pedestrian and cycle facility. The tactile surface is used to indicate the boundary between the two facilities. The tactile surface is used to help people who are entering such a facility, not know on which side they are walking. The segregated shared cycle/tactile/surface surface was developed to provide visually impaired people with tactile information to help them that they are entering the facility and to help them distinguish between the pedestrian and cycle facility. The tactile surface is used to indicate the boundary between the two facilities. The tactile surface is used to help people who are entering such a facility, not know on which side they are walking. The segregated shared cycle/tactile/surface surface was developed to provide visually impaired people with tactile information to help them that they are entering the facility and to help them distinguish between the pedestrian and cycle facility. The tactile surface is used to indicate the boundary between the two facilities. The tactile surface is used to help people who are entering such a facility, not know on which side they are walking. The segregated shared cycle/tactile/surface surface was developed to provide visually impaired people with tactile information to help them that they are entering the facility and to help them distinguish between the pedestrian and cycle facility. The tactile surface is used to indicate the boundary between the two facilities. The tactile surface is used to help people who are entering such a facility, not know on which side they are walking. The segregated shared cycle/tactile/surface surface was developed to provide visually impaired people with tactile information to help them that they are entering the facility and to help them distinguish between the pedestrian and cycle facility. The tactile surface is used to indicate the boundary between the two facilities. The tactile surface is used to help people who are entering such a facility, not know on which side they are walking. The segregated shared cycle/tactile/surface surface was developed to provide visually impaired people with tactile information to help them that they are entering the facility and to help them distinguish between the pedestrian and cycle facility. The tactile surface is used to indicate the boundary between the two facilities. The tactile surface is used to help people who are entering such a facility, not know on which side they are walking. The segregated shared cycle/tactile/surface surface was developed to provide visually impaired people with tactile information to help them that they are entering the facility and to help them distinguish between the pedestrian and cycle facility. The tactile surface is used to indicate the boundary between the two facilities. The tactile surface is used to help people who are entering such a facility, not know on which side they are walking. The segregated shared cycle/tactile/surface surface was developed to provide visually impaired people with tactile information to help them that they are entering the facility and to help them distinguish between the pedestrian and cycle facility. The tactile surface is used to indicate the boundary between the two facilities. The tactile surface is used to help people who are entering such a facility, not know on which side they are walking. The segregated shared cycle/tactile/surface surface was developed to provide visually impaired people with tactile information to help them that they are entering the facility and to help them distinguish between the pedestrian and cycle facility. The tactile surface is used to indicate the boundary between the two facilities. The tactile surface is used to help people who are entering such a facility, not know on which side they are walking. The segregated shared cycle/tactile/surface surface was developed to provide visually impaired people with tactile information to help them that they are entering the facility and to help them distinguish between the pedestrian and cycle facility. The tactile surface is used to indicate the boundary between the two facilities. The tactile surface is used to help people who are entering such a facility, not know on which side they are walking. The segregated shared cycle/tactile/surface surface was developed to provide visually impaired people with tactile information to help them that they are entering the facility and to help them distinguish between the pedestrian and cycle facility. The tactile surface is used to indicate the boundary between the two facilities. The tactile surface is used to help people who are entering such a facility, not know on which side they are walking. The segregated shared cycle/tactile/surface surface was developed to provide visually impaired people with tactile information to help them that they are entering the facility and to help them distinguish between the pedestrian and cycle facility. The tactile surface is used to indicate the boundary between the two facilities. The tactile surface is used to help people who are entering such a facility, not know on which side they are walking. The segregated shared cycle/tactile/surface surface was developed to provide visually impaired people with tactile information to help them that they are entering the facility and to help them distinguish between the pedestrian and cycle facility. The tactile surface is used to indicate the boundary between the two facilities. The tactile surface is used to help people who are entering such a facility, not know on which side they are walking. The segregated shared cycle/tactile/surface surface was developed to provide visually impaired people with tactile information to help them that they are entering the facility and to help them distinguish between the pedestrian and cycle facility. The tactile surface is used to indicate the boundary between the two facilities. The tactile surface is used to help people who are entering such a facility, not know on which side they are walking. The segregated shared cycle/tactile/surface surface was developed to provide visually impaired people with tactile information to help them that they are entering the facility and to help them distinguish between the pedestrian and cycle facility. The tactile surface is used to indicate the boundary between the two facilities. The tactile surface is used to help people who are entering such a facility, not know on which side they are walking. The segregated shared cycle/tactile/surface surface was developed to provide visually impaired people with tactile information to help them that they are entering the facility and to help them distinguish between the pedestrian and cycle facility. The tactile surface is used to indicate the boundary between the two facilities. The tactile surface is used to help people who are entering such a facility, not know on which side they are walking. The segregated shared cycle/tactile/surface surface was developed to provide visually impaired people with tactile information to help them that they are entering the facility and to help them distinguish between the pedestrian and cycle facility. The tactile surface is used to indicate the boundary between the two facilities. The tactile surface is used to help people who are entering such a facility, not know on which side they are walking. The segregated shared cycle/tactile/surface surface was developed to provide visually impaired people with tactile information to help them that they are entering the facility and to help them distinguish between the pedestrian and cycle facility. The tactile surface is used to indicate the boundary between the two facilities. The tactile surface is used to help people who are entering such a facility, not know on which side they are walking. The segregated shared cycle/tactile/surface surface was developed to provide visually impaired people with tactile information to help them that they are entering the facility and to help them distinguish between the pedestrian and cycle facility. The tactile surface is used to indicate the boundary between the two facilities. The tactile surface is used to help people who are entering such a facility, not know on which side they are walking. The segregated shared cycle/tactile/surface surface was developed to provide visually impaired people with tactile information to help them that they are entering the facility and to help them distinguish between the pedestrian and cycle facility. The tactile surface is used to indicate the boundary between the two facilities. The tactile surface is used to help people who are entering such a facility, not know on which side they are walking. The segregated shared cycle/tactile/surface surface was developed to provide visually impaired people with tactile information to help them that they are entering the facility and to help them distinguish between the pedestrian and cycle facility. The tactile surface is used to indicate the boundary between the two facilities. The tactile surface is used to help people who are entering such a facility, not know on which side they are walking. The segregated shared cycle/tactile/surface surface was developed to provide visually impaired people with tactile information to help them that they are entering the facility and to help them distinguish between the pedestrian and cycle facility. The tactile surface is used to indicate the boundary between the two facilities. The tactile surface is used to help people who are entering such a facility, not know on which side they are walking. The segregated shared cycle/tactile/surface surface was developed to provide visually impaired people with tactile information to help them that they are entering the facility and to help them distinguish between the pedestrian and cycle facility. The tactile surface is used to indicate the boundary between the two facilities. The tactile surface is used to help people who are entering such a facility, not know on which side they are walking. The segregated shared cycle/tactile/surface surface was developed to provide visually impaired people with tactile information to help them that they are entering the facility and to help them distinguish between the pedestrian and cycle facility. The tactile surface is used to indicate the boundary between the two facilities. The tactile surface is used to help people who are entering such a facility, not know on which side they are walking. The segregated shared cycle/tactile/surface surface was developed to provide visually impaired people with tactile information to help them that they are entering the facility and to help them distinguish between the pedestrian and cycle facility. The tactile surface is used to indicate the boundary between the two facilities. The tactile surface is used to help people who are entering such a facility, not know on which side they are walking. The segregated shared cycle/tactile/surface surface was developed to provide visually impaired people with tactile information to help them that they are entering the facility and to help them distinguish between the pedestrian and cycle facility. The tactile surface is used to indicate the boundary between the two facilities. The tactile surface is used to help people who are entering such a facility, not know on which side they are walking. The segregated shared cycle/tactile/surface surface was developed to provide visually impaired people with tactile information to help them that they are entering the facility and to help them distinguish between the pedestrian and cycle facility. The tactile surface is used to indicate the boundary between the two facilities. The tactile surface is used to help people who are entering such a facility, not know on which side they are walking. The segregated shared cycle/tactile/surface surface was developed to provide visually impaired people with tactile information to help them that they are entering the facility and to help them distinguish between the pedestrian and cycle facility. The tactile surface is used to indicate the boundary between the two facilities. The tactile surface is used to help people who are entering such a facility, not know on which side they are walking. The segregated shared cycle/tactile/surface surface was developed to provide visually impaired people with tactile information to help them that they are entering the facility and to help them distinguish between the pedestrian and cycle facility. The tactile surface is used to indicate the boundary between the two facilities. The tactile surface is used to help people who are entering such a facility, not know on which side they are walking. The segregated shared cycle/tactile/surface surface was developed to provide visually impaired people with tactile information to help them that they are entering the facility and to help them distinguish between the pedestrian and cycle facility. The tactile surface is used to indicate the boundary between the two facilities. The tactile surface is used to help people who are entering such a facility, not know on which side they are walking. The segregated shared cycle/tactile/surface surface was developed to provide visually impaired people with tactile information to help them that they are entering the facility and to help them distinguish between the pedestrian and cycle facility. The tactile surface is used to indicate the boundary between the two facilities. The tactile surface is used to help people who are entering such a facility, not know on which side they are walking. The segregated shared cycle/tactile/surface surface was developed to provide visually impaired people with tactile information to help them that they are entering the facility and to help them distinguish between the pedestrian and cycle facility. The tactile surface is used to indicate the boundary between the two facilities. The tactile surface is used to help people who are entering such a facility, not know on which side they are walking. The segregated shared cycle/tactile/surface surface was developed to provide visually impaired people with tactile information to help them that they are entering the facility and to help them distinguish between the pedestrian and cycle facility. The tactile surface is used to indicate the boundary between the two facilities. The tactile surface is used to help people who are entering such a facility, not know on which side they are walking. The segregated shared cycle/tactile/surface surface was developed to provide visually impaired people with tactile information to help them that they are entering the facility and to help them distinguish between the pedestrian and cycle facility. The tactile surface is used to indicate the boundary between the two facilities. The tactile surface is used to help people who are entering such a facility, not know on which side they are walking. The segregated shared cycle/tactile/surface surface was developed to provide visually impaired people with tactile information to help them that they are entering the facility and to help them distinguish between the pedestrian and cycle facility. The tactile surface is used to indicate the boundary between the two facilities. The tactile surface is used to help people who are entering such a facility, not know on which side they are walking. The segregated shared cycle/tactile/surface surface was developed to provide visually impaired people with tactile information to help them that they are entering the facility and to help them distinguish between the pedestrian and cycle facility. The tactile surface is used to indicate the boundary between the two facilities. The tactile surface is used to help people who are entering such a facility, not know on which side they are walking. The segregated shared cycle/tactile/surface surface was developed to provide visually impaired people with tactile information to help them that they are entering the facility and to help them distinguish between the pedestrian and cycle facility. The tactile surface is used to indicate the boundary between the two facilities. The tactile surface is used to help people who are entering such a facility, not know on which side they are walking. The segregated shared cycle/tactile/surface surface was developed to provide visually impaired people with tactile information to help them that they are entering the facility and to help them distinguish between the pedestrian and cycle facility. The tactile surface is used to indicate the boundary between the two facilities. The tactile surface is used to help people who are entering such a facility, not know on which side they are walking. The segregated shared cycle/tactile/surface surface was developed to provide visually impaired people with tactile information to help them that they are entering the facility and to help them distinguish between the pedestrian and cycle facility. The tactile surface is used to indicate the boundary between the two facilities. The tactile surface is used to help people who are entering such a facility, not know on which side they are walking. The segregated shared cycle/tactile/surface surface was developed to provide visually impaired people with tactile information to help them that they are entering the facility and to help them distinguish between the pedestrian and cycle facility. The tactile surface is used to indicate the boundary between the two facilities. The tactile surface is used to help people who are entering such a facility, not know on which side they are walking. The segregated shared cycle/tactile/surface surface was developed to provide visually impaired people with tactile information to help them that they are entering the facility and to help them distinguish between the pedestrian and cycle facility. The tactile surface is used to indicate the boundary between the two facilities. The tactile surface is used to help people who are entering such a facility, not know on which side they are walking. The segregated shared cycle/tactile/surface surface was developed to provide visually impaired people with tactile information to help them that they are entering the facility and to help them distinguish between the pedestrian and cycle facility. The tactile surface is used to indicate the boundary between the two facilities. The tactile surface is used to help people who are entering such a facility, not know on which side they are walking. The segregated shared cycle/tactile/surface surface was developed to provide visually impaired people with tactile information to help them that they are entering the facility and to help them distinguish between the pedestrian and cycle facility. The tactile surface is used to indicate the boundary between the two facilities. The tactile surface is used to help people who are entering such a facility, not know on which side they are walking. The segregated shared cycle/tactile/surface surface was developed to provide visually impaired people with tactile information to help them that they are entering the facility and to help them distinguish between the pedestrian and cycle facility. The tactile surface is used to indicate the boundary between the two facilities. The tactile surface is used to help people who are entering such a facility, not know on which side they are walking. The segregated shared cycle/tactile/surface surface was developed to provide visually impaired people with tactile information to help them that they are entering the facility and to help them distinguish between the pedestrian and cycle facility. The tactile surface is used to indicate the boundary between the two facilities. The tactile surface is used to help people who are entering such a facility, not know on which side they are walking. The segregated shared cycle/tactile/surface surface was developed to provide visually impaired people with tactile information to help them that they are entering the facility and to help them distinguish between the pedestrian and cycle facility. The tactile surface is used to indicate the boundary between the two facilities. The tactile surface is used to help people who are entering such a facility, not know on which side they are walking. The segregated shared cycle/tactile/surface surface was developed to provide visually impaired people with tactile information to help them that they are entering the facility and to help them distinguish between the pedestrian and cycle facility. The tactile surface is used to indicate the boundary between the two facilities. The tactile surface is used to help people who are entering such a facility, not know on which side they are walking. The segregated shared cycle/tactile/surface surface was developed to provide visually impaired people with tactile information to help them that they are entering the facility and to help them distinguish between the pedestrian and cycle facility. The tactile surface is used to indicate the boundary between the two facilities. The tactile surface is used to help people who are entering such a facility, not know on which side they are walking. The segregated shared cycle/tactile/surface surface was developed to provide visually impaired people with tactile information to help them that they are entering the facility and to help them distinguish between the pedestrian and cycle facility. The tactile surface is used to indicate the boundary between the two facilities. The tactile surface is used to help people who are entering such a facility, not know on which side they are walking. The segregated shared cycle/tactile/surface surface was developed to provide visually impaired people with tactile information to help them that they are entering the facility and to help them distinguish between the pedestrian and cycle facility. The tactile surface is used to indicate the boundary between the two facilities. The tactile surface is used to help people who are entering such a facility, not know on which side they are walking. The segregated shared cycle/tactile/surface surface was developed to provide visually impaired people with tactile information to help them that they are entering the facility and to help them distinguish between the pedestrian and cycle facility. The tactile surface is used to indicate the boundary between the two facilities. The tactile surface is used to help people who are entering such a facility, not know on which side they are walking. The segregated shared cycle/tactile/surface surface was developed to provide visually impaired people with tactile information to help them that they are entering the facility and to help them distinguish between the pedestrian and cycle facility. The tactile surface is used to indicate the boundary between the two facilities. The tactile surface is used to help people who are entering such a facility, not know on which side they are walking. The segregated shared cycle/tactile/surface surface was developed to provide visually impaired people with tactile information to help them that they are entering the facility and to help them distinguish between the pedestrian and cycle facility. The tactile surface is used to indicate the boundary between the two facilities. The tactile surface is used to help people who are entering such a facility, not know on which side they are walking. The segregated shared cycle/tactile/surface surface was developed to provide visually impaired people with tactile information to help them that they are entering the facility and to help them distinguish between the pedestrian and cycle facility. The tactile surface is used to indicate the boundary between the two facilities. The tactile surface is used to help people who are entering such a facility, not know on which side they are walking. The segregated shared cycle/tactile/surface surface was developed to provide visually impaired people with tactile information to help them that they are entering the facility and to help them distinguish between the pedestrian and cycle facility. The tactile surface is used to indicate the boundary between the two facilities. The tactile surface is used to help people who are entering such a facility, not know on which side they are walking. The segregated shared cycle/tactile/surface surface was developed to provide visually impaired people with tactile information to help them that they are entering the facility and to help them distinguish between the pedestrian and cycle facility. The tactile surface is used to indicate the boundary between the two facilities. The tactile surface is used to help people who are entering such a facility, not know on which side they are walking. The segregated shared cycle/tactile/surface surface was developed to provide visually impaired people with tactile information to help them that they are entering the facility and to help them distinguish between the pedestrian and cycle facility. The tactile surface is used to indicate the boundary between the two facilities. The tactile surface is used to help people who are entering such a facility, not know on which side they are walking. The segregated shared cycle/tactile/surface surface was developed to provide visually impaired people with tactile information to help them that they are entering the facility and to help them distinguish between the pedestrian and cycle facility. The tactile surface is used to indicate the boundary between the two facilities. The tactile surface is used to help people who are entering such a facility, not know on which side they are walking. The segregated shared cycle/tactile/surface surface was developed to provide visually impaired people with tactile information to help them that they are entering the facility and to help them distinguish between the pedestrian and cycle facility. The tactile surface is used to indicate the boundary between the two facilities. The tactile surface is used to help people who are entering such a facility, not know on which side they are walking. The segregated shared cycle/tactile/surface surface was developed to provide visually impaired people with tactile information to help them that they are entering the facility and to help them distinguish between the pedestrian and cycle facility. The tactile surface is used to indicate the boundary between the two facilities. The tactile surface is used to help people who are entering such a facility, not know on which side they are walking. The segregated shared cycle/tactile/surface surface was developed to provide visually impaired people with tactile information to help them that they are entering the facility and to help them distinguish between the pedestrian and cycle facility. The tactile surface is used to indicate the boundary between the two facilities. The tactile surface is used to help people who are entering such a facility, not know on which side they are walking. The segregated shared cycle/tactile/surface surface was developed to provide visually impaired people with tactile information to help them that they are entering the facility and to help them distinguish between the pedestrian and cycle facility. The tactile surface is used to indicate the boundary between the two facilities. The tactile surface is used to help people who are entering such a facility, not know on which side they are walking. The segregated shared cycle/tactile/surface surface was developed to provide visually impaired people with tactile information to help them that they are entering the facility and to help them distinguish between the pedestrian and cycle facility. The tactile surface is used to indicate the boundary between the two facilities. The tactile surface is used to help people who are entering such a facility, not know on which side they are walking. The segregated shared cycle/tactile/surface surface was developed to provide visually impaired people with tactile information to help them that they are entering the facility and to help them distinguish between the pedestrian and cycle facility. The tactile surface is used to indicate the boundary between the two facilities. The tactile surface is used to help people who are entering such a facility, not know on which side they are walking. The segregated shared cycle/tactile/surface surface was developed to provide visually impaired people with tactile information to help them that they are entering the facility and to help them distinguish between the pedestrian and cycle facility. The tactile surface is used to indicate the boundary between the two facilities. The tactile surface is used to help people who are entering such a facility, not know on which side they are walking. The segregated shared cycle/tactile/surface surface was developed to provide visually impaired people with tactile information to help them that they are entering the facility and to help them distinguish between the pedestrian and cycle facility. The tactile surface is used to indicate the boundary between the two facilities. The tactile surface is used to help people who are entering such a facility, not know on which side they are walking. The segregated shared cycle/tactile/surface surface was developed to provide visually impaired people with tactile information to help them that they are entering the facility and to help them distinguish between the pedestrian and cycle facility. The tactile surface is used to indicate the boundary between the two facilities. The tactile surface is used to help people who are entering such a facility, not know on which side they are walking. The segregated shared cycle/tactile/surface surface was developed to provide visually impaired people with tactile information to help them that they are entering the facility and to help them distinguish between the pedestrian and cycle facility. The tactile surface is used to indicate the boundary between the two facilities. The tactile surface is used to help people who are entering such a facility, not know on which side they are walking. The segregated shared cycle/tactile/surface surface was developed to provide visually impaired people with tactile information to help them that they are entering the facility and to help them distinguish between the pedestrian and cycle facility. The tactile surface is used to indicate the boundary between the two facilities. The tactile surface is used to help people who are entering such a facility, not know on which side they are walking. The segregated shared cycle/tactile/surface surface was developed to provide visually impaired people with tactile information to help them that they are entering the facility and to help them distinguish between the pedestrian and cycle facility. The tactile surface is used to indicate the boundary between the two facilities. The tactile surface is used to help people who are entering such a facility, not know on which side they are walking. The segregated shared cycle/tactile/surface surface was developed to provide visually impaired people with tactile information to help them that they are entering the facility and to help them distinguish between the pedestrian and cycle facility. The tactile surface is used to indicate the boundary between the two facilities. The tactile surface is used to help people who are entering such a facility, not know on which side they are walking. The segregated shared cycle/tactile/surface surface was developed to provide visually impaired people with tactile information to help them that they are entering the facility and to help them distinguish between the pedestrian and cycle facility. The tactile surface is used to indicate the boundary between the two facilities. The tactile surface is used to help people who are entering such a facility, not know on which side they are walking. The segregated shared cycle/tactile/surface surface was developed to provide visually impaired people with tactile information to help them that they are entering the facility and to help them distinguish between the pedestrian and cycle facility. The tactile surface is used to indicate the boundary between the two facilities. The tactile surface is used to help people who are entering such a facility, not know on which side they are walking. The segregated shared cycle/tactile/surface surface was developed to provide visually impaired people with tactile information to help them that they are entering the facility and to help them distinguish between the pedestrian and cycle facility. The tactile surface is used to indicate the boundary between the two facilities. The tactile surface is used to help people who are entering such a facility, not know on which side they are walking. The segregated shared cycle/tactile/surface surface was developed to provide visually impaired people with tactile information to help them that they are entering the facility and to help them distinguish between the pedestrian and cycle facility. The tactile surface is used to indicate the boundary between the two facilities. The tactile surface is used to help people who are entering such a facility, not know on which side they are walking. The segregated shared cycle/tactile/surface surface was developed to provide visually impaired people with tactile information to help them that they are entering the facility and to help them distinguish between the pedestrian and cycle facility. The tactile surface is used to indicate the boundary between the two facilities. The tactile surface is used to help people who are entering such a facility, not know on which side they are walking. The segregated shared cycle/tactile/surface surface was developed to provide visually impaired people with tactile information to help them that they are entering the facility and to help them distinguish between the pedestrian and cycle facility. The tactile surface is used to indicate the boundary between the two facilities. The tactile surface is used to help people who are entering such a facility, not know on which side they are walking. The segregated shared cycle/tactile/surface surface was developed to provide visually impaired people with tactile information to help them that they are entering the facility and to help them distinguish between the pedestrian and cycle facility. The tactile surface is used to indicate the boundary between the two facilities. The tactile surface is used to help people who are entering such a facility, not know on which side they are walking. The segregated shared cycle/tactile/surface surface was developed to provide visually impaired people with tactile information to help them that they are entering the facility and to help them distinguish between the pedestrian and cycle facility. The tactile surface is used to indicate the boundary between the two facilities. The tactile surface is used to help people who are entering such a facility, not know on which side they are walking. The segregated shared cycle/tactile/surface surface was developed to provide visually impaired people with tactile information to help them that they are entering the facility and to help them distinguish between the pedestrian and cycle facility. The tactile surface is used to indicate the boundary between the two facilities. The tactile surface is used to help people who are entering such a facility, not know on which side they are walking. The segregated shared cycle/tactile/surface surface was developed to provide visually impaired people with tactile information to help them that they are entering the facility and to help them distinguish between the pedestrian and cycle facility. The tactile surface is used to indicate the boundary between the two facilities. The tactile surface is used to help people who are entering such a facility, not know on which side they are walking. The segregated shared cycle/tactile/surface surface was developed to provide visually impaired people with tactile information to help them that they are entering the facility and to help them distinguish between the pedestrian and cycle facility. The tactile surface is used to indicate the boundary between the two facilities. The tactile surface is used to help people who are entering such a facility, not know on which side they are walking. The segregated shared cycle/tactile/surface surface was developed to provide visually impaired people with tactile information to help them that they are entering the facility and to help them distinguish between the pedestrian and cycle facility. The tactile surface is used to indicate the boundary between the two facilities. The tactile surface is used to help people who are entering such a facility, not know on which side they are walking. The segregated shared cycle/tactile/surface surface was developed to provide visually impaired people with tactile information to help them that they are entering the facility and to help them distinguish between the pedestrian and cycle facility. The tactile surface is used to indicate the boundary between the two facilities. The tactile surface is used to help people who are entering such a facility, not know on which side they are walking. The segregated shared cycle/tactile/surface surface was developed to provide visually impaired people with tactile information to help them that they are entering the facility and to help them distinguish between the pedestrian and cycle facility. The tactile surface is used to indicate the boundary between the two facilities. The tactile surface is used to help people who are entering such a facility, not know on which side they are walking. The segregated shared cycle/tactile/surface surface was developed to provide visually impaired people with tactile information to help them that they are entering the facility and to help them distinguish between the pedestrian and cycle facility. The tactile surface is used to indicate the boundary between the two facilities. The tactile surface is used to help people who are entering such a facility, not know on which side they are walking. The segregated shared cycle/tactile/surface surface was developed to provide visually impaired people with tactile information to help them that they are entering the facility and to help them distinguish between the pedestrian and cycle facility. The tactile surface is used to indicate the boundary between the two facilities. The tactile surface is used to help people who are entering such a facility, not know on which side they are walking. The segregated shared cycle/tactile/surface surface was developed to provide visually impaired people with tactile information to help them that they are entering the facility and to help them distinguish between the pedestrian and cycle facility. The tactile surface is used to indicate the boundary between the two facilities. The tactile surface is used to help people who are entering such a facility, not know on which side they are walking. The segregated shared cycle/tactile/surface surface was developed to provide visually impaired people with tactile information to help them that they are entering the facility and to help them distinguish between the pedestrian and cycle facility. The tactile surface is used to indicate the boundary between the two facilities. The tactile surface is used to help people who are entering such a facility, not know on which side they are walking. The segregated shared cycle/tactile/surface surface was developed to provide visually impaired people with tactile information to help them that they are entering the facility and to help them distinguish between the pedestrian and cycle facility. The tactile surface is used to indicate the boundary between the two facilities. The tactile surface is used to help people who are entering such a facility, not know on which side they are walking. The segregated shared cycle/tactile/surface surface was developed to provide visually impaired people with tactile information to help them that they are entering the facility and to help them distinguish between the pedestrian and cycle facility. The tactile surface is used to indicate the boundary between the two facilities. The tactile surface is used to help people who are entering such a facility, not know on which side they are walking. The segregated shared cycle/tactile/surface surface was developed to provide visually impaired people with tactile information to help them that they are entering the facility and to help them distinguish between the pedestrian and cycle facility. The tactile surface is used to indicate the boundary between the two facilities. The tactile surface is used to help people who are entering such a facility, not know on which side they are walking. The segregated shared cycle/tactile/surface surface was developed to provide visually impaired people with tactile information to help them that they are entering the facility and to help them distinguish between the pedestrian and cycle facility. The tactile surface is used to indicate the boundary between the two facilities. The tactile surface is used to help people who are entering such a facility, not know on which side they are walking. The segregated shared cycle/tactile/surface surface was developed to provide visually impaired people with tactile information to help them that they are entering the facility and to help them distinguish between the pedestrian and cycle facility. The tactile surface is used to indicate the boundary between the two facilities. The tactile surface is used to help people who are entering such a facility, not know on which side they are walking. The segregated shared cycle/tactile/surface surface was developed to provide visually impaired people with tactile information to help them that they are entering the facility and to help them distinguish between the pedestrian and cycle facility. The tactile surface is used to indicate the boundary between the two facilities. The tactile surface is used to help people who are entering such a facility, not know on which side they are walking. The segregated shared cycle/tactile/surface surface was developed to provide visually impaired people with tactile information to help them that they are entering the facility and to help them distinguish between the pedestrian and cycle facility. The tactile surface is used to indicate the boundary between the two facilities. The tactile surface is used to help people who are entering such a facility, not know on which side they are walking. The segregated shared cycle/tactile/surface surface was developed to provide visually impaired people with tactile information to help them that they are entering the facility and to help them distinguish between the pedestrian and cycle facility. The tactile surface is used to indicate the boundary between the two facilities. The tactile surface is used to help people who are entering such a facility, not know on which side they are walking. The segregated shared cycle/tactile/surface surface was developed to provide visually impaired people with tactile information to help them that they are entering the facility and to help them distinguish between the pedestrian and cycle facility. The tactile surface is used to indicate the boundary between the two facilities. The tactile surface is used to help people who are entering such a facility, not know on which side they are walking. The segregated shared cycle/tactile/surface surface was developed to provide visually impaired people with tactile information to help them that they are entering the facility and to help them distinguish between the pedestrian and cycle facility. The tactile surface is used to indicate the boundary between the two facilities. The tactile surface is used to help people who are entering such a facility, not know on which side they are walking. The segregated shared cycle/tactile/surface surface was developed to provide visually impaired people with tactile information to help them that they are entering the facility and to help them distinguish between the pedestrian and cycle facility. The tactile surface is used to indicate the boundary between the two facilities. The tactile surface is used to help people who are entering such a facility, not know on which side they are walking. The segregated shared cycle/tactile/surface surface was developed to provide visually impaired people with tactile information to help them that they are entering the facility and to help them distinguish between the pedestrian and cycle facility. The tactile surface is used to indicate the boundary between the two facilities. The tactile surface is used to help people who are entering such a facility, not know on which side they are walking. The segregated shared cycle/tactile/surface surface was developed to provide visually impaired people with tactile information to help them that they are entering the facility and to help them distinguish between the pedestrian and cycle facility. The tactile surface is used to indicate the boundary between the two facilities. The tactile surface is used to help people who are entering such a facility, not know on which side they are walking. The segregated shared cycle/tactile/surface surface was developed to provide visually impaired people with tactile information to help them that they are entering the facility and to help them distinguish between the pedestrian and cycle facility. The tactile surface is used to indicate the boundary between the two facilities. The tactile surface is used to help people who are entering such a facility, not know on which side they are walking. The segregated shared cycle/tactile/surface surface was developed to provide visually impaired people with tactile information to help them that they are entering the facility and to help them distinguish between the pedestrian and cycle facility. The tactile surface is used to indicate the boundary between the two facilities. The tactile surface is used to help people who are entering such a facility, not know on which side they are walking. The segregated shared cycle/tactile/surface surface was developed to provide visually impaired people with tactile information to help them that they are entering the facility and to help them distinguish between the pedestrian and cycle facility. The tactile surface is used to indicate the boundary between the two facilities. The tactile surface is used to help people who are entering such a facility, not know on which side they are walking. The segregated shared cycle/tactile/surface surface was developed to provide visually impaired people with tactile information to help them that they are entering the facility and to help them distinguish between the pedestrian and cycle facility. The tactile surface is used to indicate the boundary between the two facilities. The tactile surface is used to help people who are entering such a facility, not know on which side they are walking. The segregated shared cycle/tactile/surface surface was developed to provide visually impaired people with tactile information to help them that they are entering the facility and to help them distinguish between the pedestrian and cycle facility. The tactile surface is used to indicate the boundary between the two facilities. The tactile surface is used to help people who are entering such a facility, not know on which side they are walking. The segregated shared cycle/tactile/surface surface was developed to provide visually impaired people with tactile information to help them that they are entering the facility and to help them distinguish between the pedestrian and cycle facility. The tactile surface is used to indicate the boundary between the two facilities. The tactile surface is used to help people who are entering such a facility, not know on which side they are walking. The segregated shared cycle/tactile/surface surface was developed to provide visually impaired people with tactile information to help them that they are entering the facility and to help them distinguish between the pedestrian and cycle facility. The tactile surface is used to indicate the boundary between the two facilities. The tactile surface is used to help people who are entering such a facility, not know on which side they are walking. The segregated shared cycle/tactile/surface surface was developed to provide visually impaired people with tactile information to help them that they are entering the facility and to help them distinguish between the pedestrian and cycle facility. The tactile surface is used to indicate the boundary between the two facilities. The tactile surface is used to help people who are entering such a facility, not know on which side they are walking. The segregated shared cycle/tactile/surface surface was developed to provide visually impaired people with tactile information to help them that they are entering the facility and to help them distinguish between the pedestrian and cycle facility. The tactile surface is used to indicate the boundary between the two facilities. The tactile surface is used to help people who are entering such a facility, not know on which side they are walking. The segregated shared cycle/tactile/surface surface was developed to provide visually impaired people with tactile information to help them that they are entering the facility and to help them distinguish between the pedestrian and cycle facility. The tactile surface is used to indicate the boundary between the two facilities. The tactile surface is used to help people who are entering such a facility, not know on which side they are walking. The segregated shared cycle/tactile/surface surface was developed to provide visually impaired people with tactile information to help them that they are entering the facility and to help them distinguish between the pedestrian and cycle facility. The tactile surface is used to indicate the boundary between the two facilities. The tactile surface is used to help people who are entering such a facility, not know on which side they are walking. The segregated shared cycle/tactile/surface surface was developed to provide visually impaired people with tactile information to help them that they are entering the facility and to help them distinguish between the pedestrian and cycle facility. The tactile surface is used to indicate the boundary between the two facilities. The tactile surface is used to help people who are entering such a facility, not know on which side they are walking. The segregated shared cycle/tactile/surface surface was developed to provide visually impaired people with tactile information to help them that they are entering the facility and to help them distinguish between the pedestrian and cycle facility. The tactile surface is used to indicate the boundary between the two facilities. The tactile surface is used to help people who are entering such a facility, not know on which side they are walking. The segregated shared cycle/tactile/surface surface was developed to provide visually impaired people with tactile information to help them that they are entering the facility and to help them distinguish between the pedestrian and cycle facility. The tactile surface is used to indicate the boundary between the two facilities. The tactile surface is used to help people who are entering such a facility, not know on which side they are walking. The segregated shared cycle/tactile/surface surface was developed to provide visually impaired people with tactile information to help them that they are entering the facility and to help them distinguish between the pedestrian and cycle facility. The tactile surface is used to indicate the boundary between the two facilities. The tactile surface is used to help people who are entering such a facility, not know on which side they are walking. The segregated shared cycle/tactile/surface surface was developed to provide visually impaired people with tactile information to help them that they are entering the facility and to help them distinguish between the pedestrian and cycle facility. The tactile surface is used to indicate the boundary between the two facilities. The tactile surface is used to help people who are entering such a facility, not know on which side they are walking. The segregated shared cycle/tactile/surface surface was developed to provide visually impaired people with tactile information to help them that they are entering the facility and to help them distinguish between the pedestrian and cycle facility. The tactile surface is used to indicate the boundary between the two facilities. The tactile surface is used to help people who are entering such a facility, not know on which side they are walking. The segregated shared cycle/tactile/surface surface was developed to provide visually impaired people with tactile information to help them that they are entering the facility and to help them distinguish between the pedestrian and cycle facility. The tactile surface is used to indicate the boundary between the two facilities. The tactile surface is used to help people who are entering such a facility, not know on which side they are walking. The segregated shared cycle/tactile/surface surface was developed to provide visually impaired people with tactile information to help them that they are entering the facility and to help them distinguish between the pedestrian and cycle facility. The tactile surface is used to indicate the boundary between the two facilities. The tactile surface is used to help people who are entering such a facility, not know on which side they are walking. The segregated shared cycle/tactile/surface surface was developed to provide visually impaired people with tactile information to help them that they are entering the facility and to help them distinguish between the pedestrian and cycle facility. The tactile surface is used to indicate the boundary between the two facilities. The tactile surface is used to help people who are entering such a facility, not know on which side they are walking. The segregated shared cycle/tactile/surface surface was developed to provide visually impaired people with tactile information to help them that they are entering the facility and to help them distinguish between the pedestrian and cycle facility. The tactile surface is used to indicate the boundary between the two facilities. The tactile surface is used to help people who are entering such a facility, not know on which side they are walking. The segregated shared cycle/tactile/surface surface was developed to provide visually impaired people with tactile information to help them that they are entering the facility and to help them distinguish between the pedestrian and cycle facility. The tactile surface is used to indicate the boundary between the two facilities. The tactile surface is used to help people who are entering such a facility, not know on which side they are walking. The segregated shared cycle/tactile/surface surface was developed to provide visually impaired people with tactile information to help them that they are entering the facility and to help them distinguish between the pedestrian and cycle facility. The tactile surface is used to indicate the boundary between the two facilities. The tactile surface is used to help people who are entering such a facility, not know on which side they are walking. The segregated shared cycle/tactile/surface surface was developed to provide visually impaired people with tactile information to help them that they are entering the facility and to help them distinguish between the pedestrian and cycle facility. The tactile surface is used to indicate the boundary between the two facilities. The tactile surface is used to help people who are entering such a facility, not know on which side they are walking. The segregated shared cycle/tactile/surface surface was developed to provide visually impaired people with tactile information to help them that they are entering the facility and to help them distinguish between the pedestrian and cycle facility. The tactile surface is used to indicate the boundary between the two facilities. The tactile surface is used to help people who are entering such a facility, not know on which side they are walking. The segregated shared cycle/tactile/surface surface was developed to provide visually impaired people with tactile information to help them that they are entering the facility and to help them distinguish between the pedestrian and cycle facility. The tactile surface is used to indicate the boundary between the two facilities. The tactile surface is used to help people who are entering such a facility, not know on which side they are walking. The segregated shared cycle/tactile/surface surface was developed to provide visually impaired people with tactile information to help them that they are entering the facility and to help them distinguish between the pedestrian and cycle facility. The tactile surface is used to indicate the boundary between the two facilities. The tactile surface is used to help people who are entering such a facility, not know on which side they are walking. The segregated shared cycle/tactile/surface surface was developed to provide visually impaired people with tactile information to help them that they are entering the facility and to help them distinguish between the pedestrian and cycle facility. The tactile surface is used to indicate the boundary between the two facilities. The tactile surface is used to help people who are entering such a facility, not know on which side they are walking. The segregated shared cycle/tactile/surface surface was developed to provide visually impaired people with tactile information to help them that they are entering the facility and to help them distinguish between the pedestrian and cycle facility. The tactile surface is used to indicate the boundary between the two facilities. The tactile surface is used to help people who are entering such a facility, not know on which side they are walking. The segregated shared cycle/tactile/surface surface was developed to provide visually impaired people with tactile information to help them that they are entering the facility and to help them distinguish between the pedestrian and cycle facility. The tactile surface is used to indicate the boundary between the two facilities. The tactile surface is used to help people who are entering such a facility, not know on which side they are walking. The segregated shared cycle/tactile/surface surface was developed to provide visually impaired people with tactile information to help them that they are entering the facility and to help them distinguish between the pedestrian and cycle facility. The tactile surface is used to indicate the boundary between the two facilities. The tactile surface is used to help people who are entering such a facility, not know on which side they are walking. The segregated shared cycle/tactile/surface surface was developed to provide visually impaired people with tactile information to help them that they are entering the facility and to help them distinguish between the pedestrian and cycle facility. The tactile surface is used to indicate the boundary between the two facilities. The tactile surface is used to help people who are entering such a facility, not know on which side they are walking. The segregated shared cycle/tactile/surface surface was developed to provide visually impaired people with tactile information to help them that they are entering the facility and to help them distinguish between the pedestrian and cycle facility. The tactile surface is used to indicate the boundary between</p> |         |
